# Supplementary material for: Enantioselective total synthesis of (‒)-lucidumone enabled by tandem prins cyclization/cycloetherification sequence
Source: PubMed Central journal article supplement (PMC10966040; doi:10.1038/s41467-024-46896-3), 2024-03-26
Supplement: 41467_2024_46896_MOESM1_ESM.pdf [file 41467_2024_46896_MOESM1_ESM.pdf]

# Supplementary Information

## Enantioselective Total Synthesis of (–)-Lucidumone Enabled by Tandem Prins Cyclization/Cycloetherification Sequence

**Authors:** Xian-Zhang Liao, Ran Wang, Xin Wang, and Guang Li\*

Corresponding author. Email: [guang.li@imm.ac.cn](mailto:guang.li@imm.ac.cn)

### Contents

|                                          |    |
|------------------------------------------|----|
| Supplementary Information .....          | 1  |
| 1. Supplementary Methods .....           | 2  |
| 2. Supplementary Discussion .....        | 3  |
| 3. Supplementary Notes .....             | 8  |
| 3.1 Detailed experimental procedure..... | 8  |
| 3.2 NMR spectra and HPLC spectra .....   | 21 |
| 3.3 Crystallographic information .....   | 40 |
| 4. Supplementary References .....        | 44 |

## 1. Supplementary Methods

Unless otherwise stated, reagents were purchased at the highest commercial quality and used without further purification. Solvents were purchased in HPLC quality, degassed by purging thoroughly with nitrogen and dried over activated molecular sieves of appropriate size. Alternatively, they were purged with argon and passed through alumina columns in a solvent purification system (Innovative Technology). Conversion was monitored by thin layer chromatography (TLC) using Merck TLC silica gel 60 F254. Compounds were visualized by UV light at 254 nm and by dipping the plates in an ethanolic vanillin/sulfuric acid solution or an aqueous potassium permanganate solution followed by heating. Flash column chromatography was performed over silica gel (230–400 mesh).

NMR spectra were recorded on a Bruker 500 MHz and 400 MHz at room temperature, Chemical shifts ( $\delta$ ) were reported in parts per million (ppm) relative to residual solvent peaks rounded to the nearest 0.01 for proton and 0.1 for carbon. Coupling constants ( $J$ ) were reported in Hz to the nearest 0.1 Hz. Peak multiplicity was indicated as follows s (singlet), d (doublet), t (triplet), q (quartet), m (multiplet) and br (broad). Attribution of peaks was done using the multiplicities and integrals of the peaks.

IR spectra were recorded in a Perkin-Elmer 1000 series FT-IR spectrometer. The spectra were reported in  $\text{cm}^{-1}$ .

The accurate masses were measured by the mass spectrometry service of IMM, PUMC&CAMS on an Agilent 6244 Tof-MS using ESI (Electrospray Ionization).

## 2. Supplementary Discussion

Supplementary Table 1. Catalytic enantioselective intramolecular Diels-Alder cycloaddition: optimization of reaction conditions.<sup>[a]</sup>

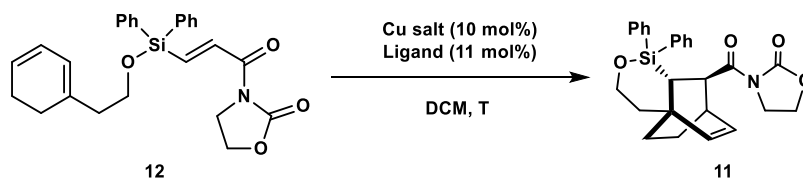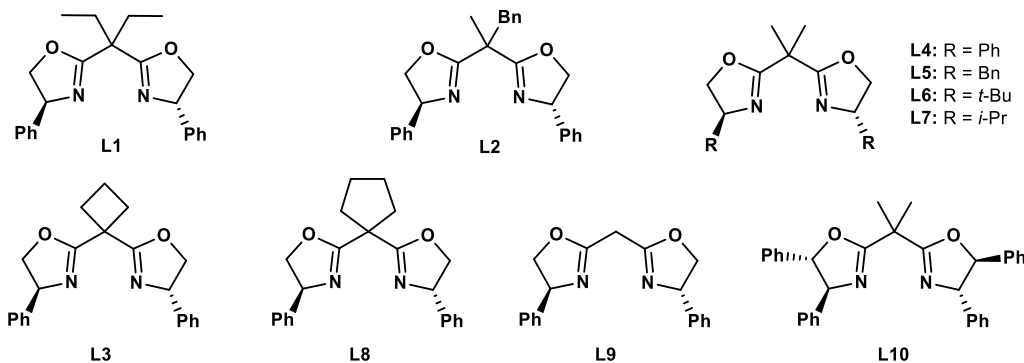

| Entry <sup>[b]</sup>    | Catalyst                                      | T[°C]     | Yield [%] <sup>[b]</sup> | ee [%] <sup>[c]</sup> |
|-------------------------|-----------------------------------------------|-----------|--------------------------|-----------------------|
| 1                       | <b>L6</b> /Cu(OTf) <sub>2</sub>               | r.t       | n.r                      | -                     |
| 2                       | <b>L6</b> /Cu(SbF <sub>6</sub> ) <sub>2</sub> | r.t       | 80                       | 87                    |
| 3                       | <b>L6</b> /Cu(SbF <sub>6</sub> ) <sub>2</sub> | 50        | 86                       | 87                    |
| 4                       | <b>L6</b> /Cu(SbF <sub>6</sub> ) <sub>2</sub> | 70        | 82                       | 87                    |
| 5                       | <b>L6</b> /Cu(SbF <sub>6</sub> ) <sub>2</sub> | 90        | 85                       | 86                    |
| 6                       | <b>L7</b> /Cu(SbF <sub>6</sub> ) <sub>2</sub> | 50        | 85                       | 17                    |
| 7 <sup>[e]</sup>        | <b>L4</b> /Cu(SbF <sub>6</sub> ) <sub>2</sub> | 50        | 84                       | 89                    |
| 8 <sup>[e]</sup>        | <b>L4</b> /Cu(OTf) <sub>2</sub>               | 50        | 95                       | 91                    |
| 9 <sup>[e]</sup>        | <b>L5</b> /Cu(SbF <sub>6</sub> ) <sub>2</sub> | 50        | 88                       | 60                    |
| 10 <sup>[e]</sup>       | <b>L1</b> /Cu(SbF <sub>6</sub> ) <sub>2</sub> | 50        | 88                       | 92                    |
| <b>11<sup>[e]</sup></b> | <b>L1</b> /Cu(OTf) <sub>2</sub>               | <b>50</b> | <b>96</b>                | <b>92</b>             |
| 12 <sup>[d][e]</sup>    | <b>L1</b> /Cu(OTf) <sub>2</sub>               | 50        | 95                       | 92                    |
| 13 <sup>[e]</sup>       | <b>L2</b> /Cu(OTf) <sub>2</sub>               | 50        | 90                       | 85                    |
| 14 <sup>[e]</sup>       | <b>L3</b> /Cu(OTf) <sub>2</sub>               | 50        | 86                       | 63                    |
| 15 <sup>[e]</sup>       | <b>L8</b> /Cu(OTf) <sub>2</sub>               | 50        | 85                       | 77                    |
| 16                      | <b>L9</b> /Cu(OTf) <sub>2</sub>               | 50        | n.r                      | -                     |
| 17                      | <b>L10</b> /Cu(OTf) <sub>2</sub>              | 50        | n.r                      | -                     |

[a] Standard conditions: **12** (0.1 mmol), CuX<sub>2</sub> (0.01 mmol), **L\*** (0.011 mmol), DCM (c 0.1 M), sealed tube, nitrogen. [b] Isolated yields. [c] Determined by HPLC analysis. [d] **12** (3.0 mmol), Cu(OTf)<sub>2</sub> (0.3 mmol), **L1** (0.33 mmol), DCM (c 0.1 M), sealed tube, nitrogen. [e] Configuration inverse. Abbreviations: DCM = dichloromethane.

### Supplementary Table 2. Optimization of Suzuki cross-coupling reaction conditions

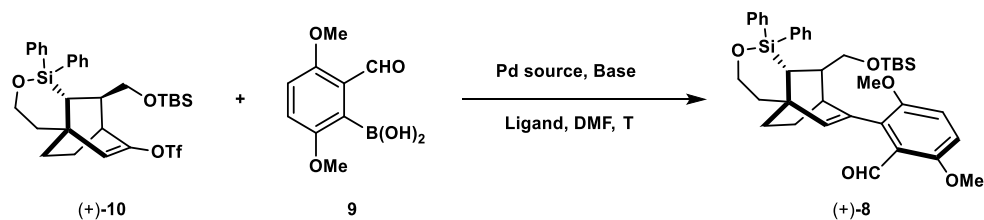

| Entry | Conditions <sup>[a]</sup>                                                | Yield of (+)-8(%) <sup>[b]</sup> |
|-------|--------------------------------------------------------------------------|----------------------------------|
| 1     | none                                                                     | 69                               |
| 2     | degassed dioxane instead of degassed DMF                                 | 20                               |
| 3     | K <sub>2</sub> CO <sub>3</sub> instead of K <sub>3</sub> PO <sub>4</sub> | 42                               |
| 4     | without S-Phos                                                           | 40                               |
| 5     | PdCl <sub>2</sub> instead of Pd(dppf)Cl <sub>2</sub>                     | 35                               |
| 6     | Pd(OAc) <sub>2</sub> instead of Pd(dppf)Cl <sub>2</sub>                  | 30                               |
| 7     | 25°C instead of 80°C                                                     | n.r.                             |

[a] All the reactions were performed using (+)-**10** (0.1 mmol), **9** (0.15 mmol), with Pd(dppf)Cl<sub>2</sub> (10 mol%) and S-Phos (20 mol%), K<sub>3</sub>PO<sub>4</sub> (0.3 mmol) in degassed DMF (2.0 mL) at 80 °C for 3 h under N<sub>2</sub> atmosphere in a Schlenk tube. [b] Isolated yield.

Supplementary Table 3. Comparison of <sup>1</sup>H and <sup>13</sup>C NMR data for isolated lucidumone and synthetic lucidumone in CD<sub>3</sub>OD

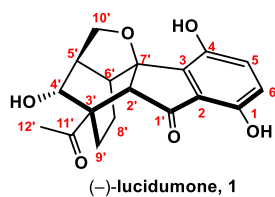

| No. | proton (J in Hz)       |                        | carbon                |                       |
|-----|------------------------|------------------------|-----------------------|-----------------------|
|     | synthetic              | isolated               | synthetic             | isolated              |
| 1   |                        |                        | 149.5, C              | 149.5, C              |
| 2   |                        |                        | 125.4, C              | 125.4, C              |
| 3   |                        |                        | 135.4, C              | 135.4, C              |
| 4   |                        |                        | 150.8, C              | 150.8, C              |
| 5   | 7.02, d (8.8)          | 7.01, d (8.7)          | 126.4, CH             | 126.4, CH             |
| 6   | 6.76, d (8.7)          | 6.75, d (8.7)          | 118.6, CH             | 118.6, CH             |
| 1'  |                        |                        | 204.3, C              | 204.2, C              |
| 2'  | 2.89, d (2.3)          | 2.88, d (2.2)          | 62.4, CH              | 62.3, CH              |
| 3'  |                        |                        | 52.7, C               | 52.7, C               |
| 4'  | 3.92 – 3.89 m          | 3.90, brs              | 79.5, CH              | 79.5, CH              |
| 5'  | 2.36, t-like (4.6)     | 2.35, t-like (4.5)     | 48.7, CH              | 48.7, CH              |
| 6'  | 2.70, q-like (3.3)     | 2.69, q-like (3.4)     | 39.1, CH              | 39.1, CH              |
| 7'  |                        |                        | 87.4, C               | 87.4, C               |
| 8'  | Ha 1.92-1.83, m        | Ha 1.86, m             | 16.2, CH <sub>2</sub> | 16.2, CH <sub>2</sub> |
|     | Hb 1.07, dddd          | Hb 1.06, m             |                       |                       |
| 9'  | Ha 2.21-2.15, m        | Ha 2.17, m             | 15.9, CH <sub>2</sub> | 15.8, CH <sub>2</sub> |
|     | Hb 1.38-1.32, m        | Hb 1.33, m             |                       |                       |
| 10' | Ha 4.26, dd (8.3, 4.9) | Ha 4.25, dd (8.3, 4.9) | 74.3, CH <sub>2</sub> | 74.3, CH <sub>2</sub> |
|     | Hb 3.78, d (8.4)       | Hb 3.77, d (8.3)       |                       |                       |
| 11' |                        |                        | 214.8, C              | 214.8, C              |
| 12' | 2.29, s                | 2.26, s                | 28.5, CH <sub>3</sub> | 28.5, CH <sub>3</sub> |

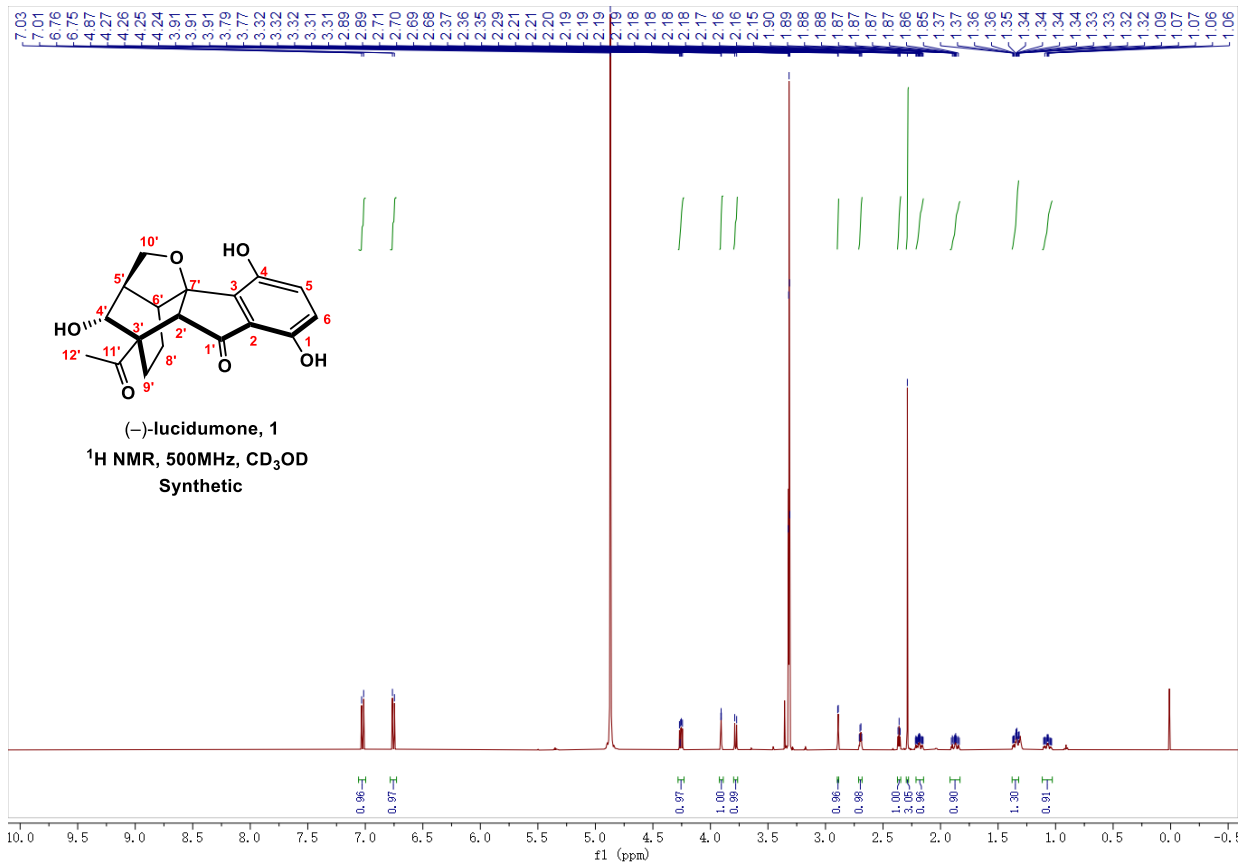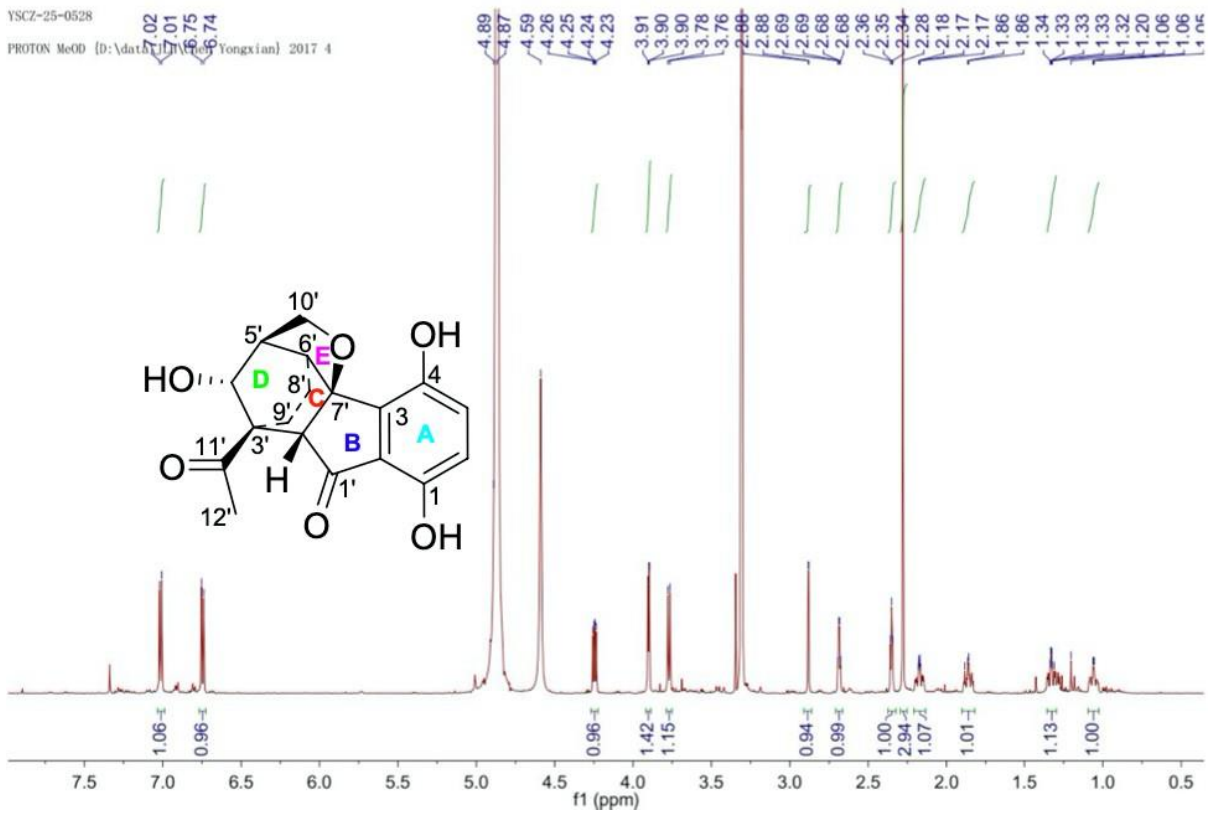

Supplementary Figure 1. <sup>1</sup>H NMR Data of synthetic and isolated lucidumone

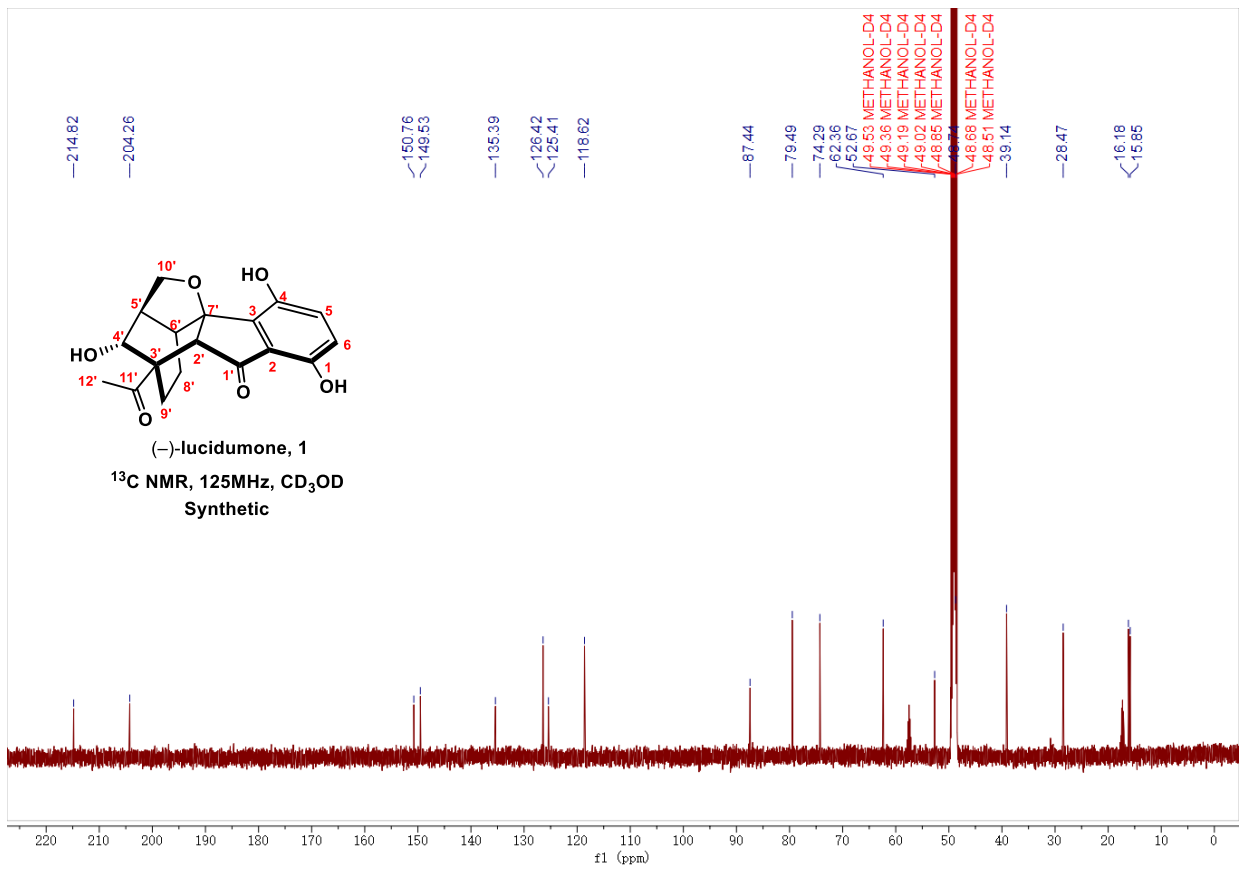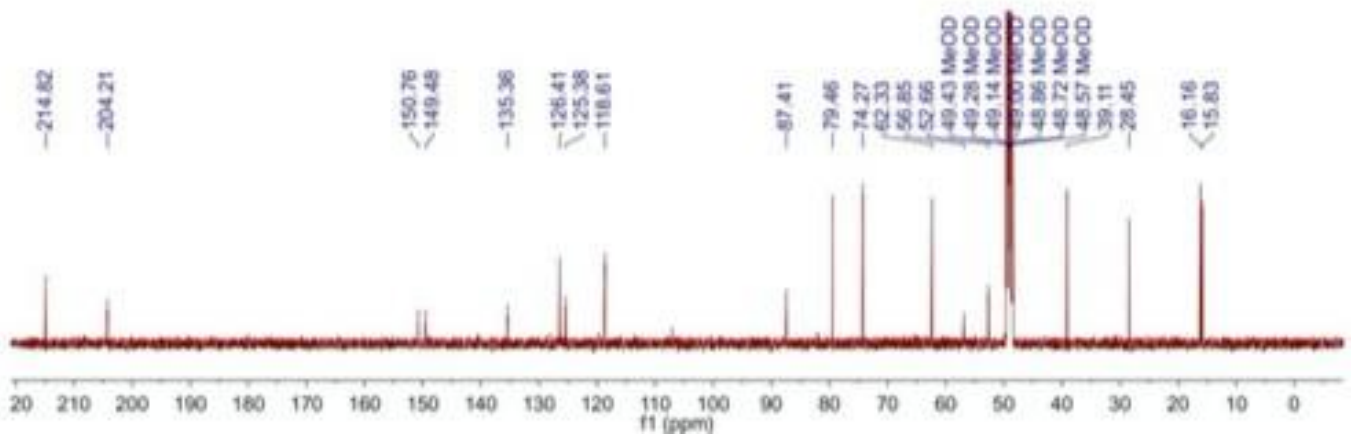

Supplementary Figure 2. <sup>13</sup>C NMR Data of synthetic and isolated lucidumone

### 3. Supplementary Notes

#### 3.1 Detailed experimental procedure

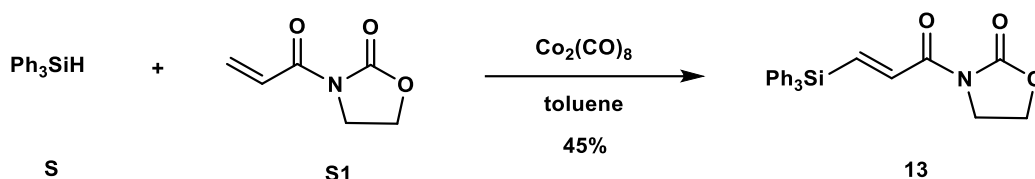

A mixture of triphenylsilane **S** (2.60 g, 10 mmol),  $\text{Co}_2(\text{CO})_8$  (136.0 mg, 0.4 mmol), **S1** (7.05 g, 50 mmol) and 50 mL of degassed toluene were added to a 200 mL Schlenk tube under  $\text{N}_2$  atmosphere, and stirred for 12 h at room temperature. Then the reaction mixture was cooled to 0 °C and quenched by saturated aqueous  $\text{NH}_4\text{Cl}$  solution, extracted with EtOAc (three times). The combined organic layers were washed with brine, dried over anhydrous  $\text{Na}_2\text{SO}_4$ , filtered, concentrated in *vacuo*. The residue was purified by silica gel flash chromatography (petroleum ether/ethyl acetate = 10/1) to afford compound **13** (1.81 g, 45%) as a white solid<sup>1</sup>.

#### Compound 13

**TLC** (petroleum ether/ethyl acetate, 5:1 v/v):  $R_f = 0.3$ .

**$^1\text{H NMR}$**  (400 MHz,  $\text{CDCl}_3$ )  $\delta$  7.88 (d,  $J = 18.5$  Hz, 1H), 7.68 (d,  $J = 18.5$  Hz, 1H), 7.57 – 7.51 (m, 6H), 7.48 – 7.36 (m, 9H), 4.41 (t,  $J = 7.9$  Hz, 2H), 4.07 (t,  $J = 8.0$  Hz, 2H).

**$^{13}\text{C NMR}$**  (100 MHz,  $\text{CDCl}_3$ )  $\delta$  164.6, 153.3, 145.0, 136.9, 136.0, 132.7, 130.1, 128.1, 62.2, 42.7.

**IR (KBr)**:  $\nu$  ( $\text{cm}^{-1}$ ) 3068, 3048, 2996, 2923, 1781, 1711, 1681, 1477, 1428, 1386, 1361, 1345, 1270, 1223, 1112, 1026, 998, 964, 844, 758, 741, 709, 700, 653, 617.

**HRMS (ESI)**:  $m/z$  calcd. for  $\text{C}_{24}\text{H}_{22}\text{NO}_3\text{Si}$  [ $\text{M}+\text{H}$ ]<sup>+</sup>: 400.1369, found 400.1364.

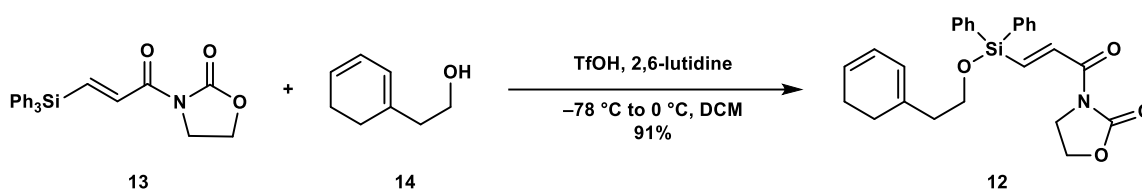

$\text{TfOH}$  (790  $\mu\text{L}$ , 8.9 mmol) was added to a solution of **13** (1.62 g, 4.1 mmol) in DCM (50 mL) at 0 °C under  $\text{N}_2$  atmosphere and stirred for 3 h. The mixture was cooled to  $-78$  °C and 2,6-lutidine (1.2 mL, 9.8 mmol) was added dropwise. After stirring for another 5 minutes, **14**<sup>2</sup> (554.7 mg, 4.5 mmol) was added. Then the mixture was warmed to 0 °C, quenched by saturated aqueous  $\text{NH}_4\text{Cl}$  solution (100 mL) and extracted with DCM (three times). The combined organic layers were washed with brine, dried over anhydrous  $\text{Na}_2\text{SO}_4$ , and concentrated *in vacuo*. The residue was subjected to flash chromatography on silica gel (petroleum ether/ethyl acetate = 10:1 to 5:1) to afford **12** (1.63 g, 91%) as a colorless oil<sup>3</sup>.

#### Compound 12

**TLC** (petroleum ether/ethyl acetate, 5:1 v/v):  $R_f = 0.2$ .



**<sup>1</sup>H NMR** (400 MHz, CDCl<sub>3</sub>) δ 7.82 (d, *J* = 18.6 Hz, 1H), 7.67 – 7.58 (m, 5H), 7.46 – 7.36 (m, 6H), 5.90 – 5.81 (m, 1H), 5.66 (m, 2H), 4.42 (t, *J* = 8.0 Hz, 2H), 4.08 (t, *J* = 8.0 Hz, 2H), 3.88 (t, *J* = 7.0 Hz, 2H), 2.38 (t, *J* = 7.0 Hz, 2H), 2.16 – 2.08 (m, 2H), 2.08 – 1.99 (m, 2H).

**<sup>13</sup>C NMR** (100 MHz, CDCl<sub>3</sub>) δ 164.5, 153.3, 144.0, 136.4, 136.0, 135.0, 132.9, 130.5, 128.1, 124.6, 124.0, 120.6, 62.8, 62.2, 42.7, 40.4, 26.5, 22.8.

**IR (KBr):**  $\nu$  (cm<sup>-1</sup>) 2956, 2923, 2853, 1781, 1743, 1682, 1590, 1466, 1429, 1385, 1362, 1344, 1270, 1212, 1191, 1112, 1082, 1052, 1032, 969, 867, 847, 829, 758, 741, 715, 700, 662.

**HRMS (ESI):** *m/z* calcd. for C<sub>26</sub>H<sub>28</sub>NO<sub>4</sub>Si [M+H]<sup>+</sup>: 446.1788, found 446.1782.

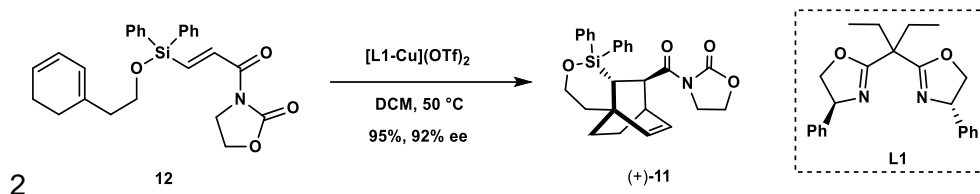

Cu(OTf)<sub>2</sub> (109.5 mg, 0.3 mmol) was added to a solution of (4*S*,4'*S*)-2,2'-(1-ethylpropylidene)bis[4,5-dihydro-4-phenyl-oxazole] (**L1**, 120.1 mg, 0.33 mmol) in DCM (20 mL) under N<sub>2</sub> atmosphere and stirred for 3 h to deliver [L1-Cu](OTf)<sub>2</sub> complex which was used without further purification. Subsequently, compound **12** (3.0 mmol, 1.32 g) in 20 mL of DCM was added to [L1-Cu](OTf)<sub>2</sub> (in 20 mL of DCM) under N<sub>2</sub> atmosphere and stirred at 50 °C for 12 h. Upon completion, the reaction was quenched by saturated aqueous NH<sub>4</sub>Cl solution and extracted with DCM (three times). The combined organic layers were washed with brine, dried over anhydrous Na<sub>2</sub>SO<sub>4</sub>, and concentrated. The residue was subjected to flash chromatography on silica gel (petroleum ether/ethyl acetate = 10:1 to 5:1) to afford (+)-**11** (1.25 g, 95%, 92% ee) as a colorless oil.

### Compound (+)-11

**TLC** (petroleum ether/ethyl acetate, 5:1 v/v): R<sub>f</sub> = 0.2.

**Optical rotation:** [α]<sub>D</sub><sup>20</sup> = +42 (c = 1.0, MeOH).

**<sup>1</sup>H NMR** (400 MHz, CDCl<sub>3</sub>) δ 7.74 (dt, *J* = 4.6, 2.6 Hz, 2H), 7.46 (tt, *J* = 3.3, 1.8 Hz, 5H), 7.38 – 7.26 (m, 3H), 6.24 (d, *J* = 8.2 Hz, 1H), 6.00 (dd, *J* = 8.3, 6.4 Hz, 1H), 4.42 (td, *J* = 13.1, 12.3, 2.3 Hz, 1H), 4.34 (td, *J* = 9.0, 7.3 Hz, 1H), 4.31 – 4.16 (m, 3H), 3.88 (dddd, *J* = 30.4, 11.1, 9.2, 6.9 Hz, 2H), 2.83 (dq, *J* = 5.7, 3.4 Hz, 1H), 2.39 (td, *J* = 13.6, 13.1, 5.0 Hz, 1H), 2.09 (dd, *J* = 7.3, 3.1 Hz, 1H), 1.88 – 1.76 (m, 2H), 1.35 – 1.26 (m, 1H), 1.19 (tt, *J* = 12.3, 3.9 Hz, 1H), 0.84 (tq, *J* = 12.1, 4.5, 3.8 Hz, 1H).

**<sup>13</sup>C NMR** (100 MHz, CDCl<sub>3</sub>) δ 174.8, 153.2, 142.8, 135.3, 134.8, 134.6, 134.1, 130.2, 130.0, 128.4, 128.1, 127.8, 61.8, 61.6, 43.0, 42.5, 38.8, 36.9, 35.1, 28.7, 26.3, 25.8.

**IR (KBr):**  $\nu$  (cm<sup>-1</sup>) 2924, 2868, 1775, 1697, 1478, 1427, 1385, 1361, 1317, 1277, 1255, 1193, 1108, 1075, 1040, 999, 982, 956, 916, 857, 759, 738, 709, 701, 686, 664.

**HRMS (ESI):** *m/z* calcd. for C<sub>26</sub>H<sub>28</sub>NO<sub>4</sub>Si [M+H]<sup>+</sup>: 446.1788, found 446.1771.

Chiral HPLC: Chiralpak OD-H, hexane:*i*-PrOH = 80:20, 1.0 mL/min, 210 nm; t<sub>R</sub> = 11.8 min (minor), 15.9 min (major).

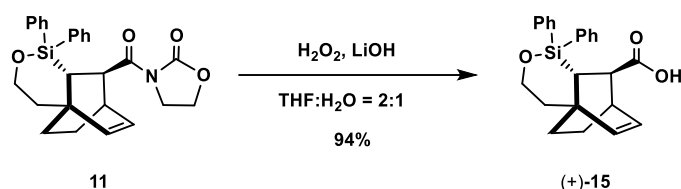

To a solution of compound **11** (448.6 mg, 1.0 mmol) in THF (10 mL) and H<sub>2</sub>O (5.0 mL) was added 30 wt.% H<sub>2</sub>O<sub>2</sub> in H<sub>2</sub>O (1.0 mL, 8.8 mmol), LiOH (72.2 mg, 3.0 mmol) at 0 °C. The mixture was stirred for 5 h then quenched by saturated Na<sub>2</sub>S<sub>2</sub>O<sub>3</sub> solution. The pH was adjusted to 1 by addition of 1M HCl and extracted with EtOAc (three times). The combined organic layers were washed with brine, dried over anhydrous Na<sub>2</sub>SO<sub>4</sub>, filtered and concentrated in *vacuo*. The resulting residue was purified by silica gel column chromatography (petroleum ether/ethyl acetate = 10:1) to afford (+)-**15** (354.2 mg, 94%) as white solid.

### Compound (+)-15

**TLC** (petroleum ether/ethyl acetate, 5:1 v/v): R<sub>f</sub> = 0.4.

**Optical rotation:**  $[\alpha]_{\text{D}}^{20} = +10$  (c = 1.0, MeOH).

**<sup>1</sup>H NMR** (500 MHz, CDCl<sub>3</sub>) δ 7.73 – 7.69 (m, 2H), 7.57 – 7.54 (m, 2H), 7.47 – 7.41 (m, 3H), 7.37 – 7.33 (m, 1H), 7.30 – 7.26 (m, 2H), 6.20 (dt, *J* = 8.2, 1.2 Hz, 1H), 6.14 (dd, *J* = 8.2, 6.3 Hz, 1H), 4.45 (ddd, *J* = 13.0, 11.5, 2.6 Hz, 1H), 4.23 (ddd, *J* = 11.5, 5.2, 1.7 Hz, 1H), 2.94 – 2.88 (m, 1H), 2.81 (dd, *J* = 7.6, 2.0 Hz, 1H), 2.31 (ddd, *J* = 14.3, 13.0, 5.3 Hz, 1H), 1.88 (ddd, *J* = 12.1, 9.6, 4.3 Hz, 1H), 1.81 (ddd, *J* = 14.3, 2.6, 1.7 Hz, 1H), 1.76 (dd, *J* = 7.6, 3.0 Hz, 1H), 1.24 – 1.17 (m, 1H), 1.07 (dddd, *J* = 12.4, 9.9, 4.3, 2.4 Hz, 1H), 0.95 – 0.87 (m, 1H).

**<sup>13</sup>C NMR** (125 MHz, CDCl<sub>3</sub>) δ 179.9, 142.5, 135.6, 134.82, 134.78, 134.4, 130.2, 130.0, 129.9, 128.0, 127.9, 61.8, 44.9, 38.5, 36.8, 34.2, 30.5, 26.3, 25.7.

**IR (KBr):** ν (cm<sup>-1</sup>) 3346, 2971, 2932, 2883, 1467, 1409, 1379, 1340, 1310, 1161, 1129, 1109, 953, 817.

**HRMS (ESI):** *m/z* calcd. for C<sub>23</sub>H<sub>25</sub>O<sub>3</sub>Si [M+H]<sup>+</sup>: 377.1573, found 377.1568.

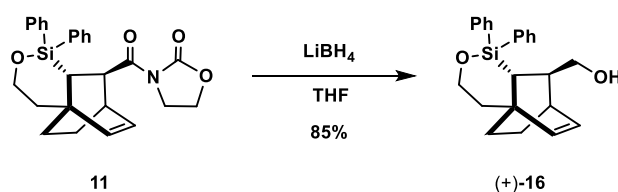

To a solution of compound **11** (44.2 mg, 0.1 mmol) in THF (2.0 mL) was added LiBH<sub>4</sub> (1.1 mmol, 23.6 mg) at 0 °C. The mixture was stirred for 3 h at r.t., then quenched by saturated NH<sub>4</sub>Cl solution and extracted with EtOAc (three times). The combined organic layers were washed with brine, dried over anhydrous Na<sub>2</sub>SO<sub>4</sub>, filtered and concentrated in *vacuo*. The resulting residue was purified by silica gel column chromatography (petroleum ether/ethyl acetate = 7:1) to afford (+)-**16** (30.5 mg, 85%) as colorless oil.

### Compound (+)-16

**TLC** (petroleum ether/ethyl acetate, 4:1 v/v): R<sub>f</sub> = 0.4.

**Optical rotation:**  $[\alpha]_{\text{D}}^{20} = +15$  ( $c = 1.0$ , MeOH).

**$^1\text{H NMR}$**  (400 MHz,  $\text{CDCl}_3$ )  $\delta$  7.85 – 7.77 (m, 2H), 7.58 – 7.52 (m, 2H), 7.46 (td,  $J = 4.4, 3.9, 2.3$  Hz, 3H), 7.34 (ddd,  $J = 14.2, 7.7, 6.0$  Hz, 3H), 6.16 – 6.08 (m, 2H), 4.41 (ddd,  $J = 13.3, 11.6, 2.4$  Hz, 1H), 4.19 (ddd,  $J = 11.6, 5.1, 1.9$  Hz, 1H), 3.11 (dd,  $J = 6.9, 2.9$  Hz, 2H), 2.64 (dq,  $J = 5.4, 2.6$  Hz, 1H), 2.32 – 2.16 (m, 2H), 1.79 (tdd,  $J = 14.2, 7.1, 3.3$  Hz, 2H), 1.20 (dt,  $J = 12.1, 4.0$  Hz, 1H), 1.11 (dddd,  $J = 12.3, 9.8, 4.2, 2.5$  Hz, 1H), 0.87 (dt,  $J = 12.1, 3.5$  Hz, 1H), 0.73 (dd,  $J = 7.3, 3.1$  Hz, 1H).

**$^{13}\text{C NMR}$**  (125 MHz,  $\text{CDCl}_3$ )  $\delta$  141.9, 136.0, 135.0, 134.7, 134.3, 130.5, 130.3, 129.9, 128.1, 128.0, 67.3, 61.6, 43.0, 39.0, 37.0, 32.5, 32.3, 26.48, 26.46.

**IR (KBr):**  $\nu$  ( $\text{cm}^{-1}$ ) 3420, 2922, 2866, 1427, 1263, 1108, 1070, 1032, 911, 859, 804, 773, 755, 734, 698, 677.

**HRMS (ESI):**  $m/z$  calcd. for  $\text{C}_{23}\text{H}_{27}\text{O}_2\text{Si}$   $[\text{M}+\text{H}]^+$ : 363.1780, found 363.1767.

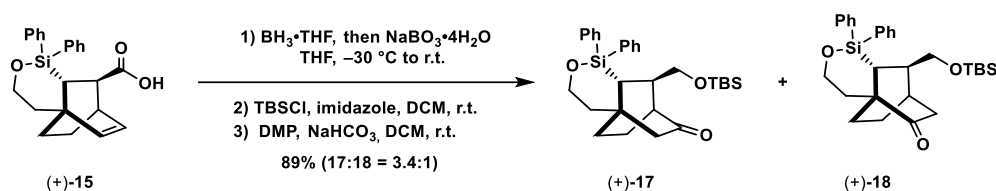

$\text{BH}_3 \cdot \text{THF}$  (1M in THF, 5.0 mL, 5.0 mmol) was added to a solution of (+)-**15** (376.5 mg, 1.0 mmol) in THF (10 mL) at  $-30\text{ }^\circ\text{C}$  under  $\text{N}_2$  atmosphere. Upon consumption of the starting material as indicated by TLC, the mixture was allowed to warm to room temperature, and stirred for another 12 h at the same temperature. Then the reaction mixture was cooled to  $0\text{ }^\circ\text{C}$  followed by the addition of  $\text{NaBO}_3 \cdot 4\text{H}_2\text{O}$  (1.53 g, 10 mmol). The reaction mixture was quenched by saturated aq.  $\text{NH}_4\text{Cl}$  and extracted with EtOAc (three times). The combined organic layers were washed with brine, dried over anhydrous  $\text{Na}_2\text{SO}_4$ , and concentrated in *vacuo* to give crude diol which was used for the next step without further purification.

To a solution of crude diol, imidazole (340 mg, 5.0 mmol) in DCM (20 mL) at room temperature was added TBSCl (453.6 mg, 3.0 mmol). The reaction was completed in 5 h, then  $\text{NaHCO}_3$  (840 mg, 10 mmol) and Dess-Martin periodinane (830.2 mg, 2.0 mmol) was added at  $0\text{ }^\circ\text{C}$ . The mixture was warmed to room temperature, and the reaction was completed in 2 h, quenched by sat.  $\text{Na}_2\text{S}_2\text{O}_3$  aq. and extracted with DCM (three times). The combined organic layers were washed with brine, dried over anhydrous  $\text{Na}_2\text{SO}_4$  and concentrated in *vacuo*. The resulting residue was purified by silica gel column chromatography (petroleum ether/ethyl acetate = 20:1 to 10:1) to afford (+)-**17** (340.2 mg, 69%) and (+)-**18** (98.6 mg, 20%) both in the form of colorless solid.

### Compound (+)-**17** (major)

**TLC** (petroleum ether/ethyl acetate, 10:1 v/v):  $R_f = 0.35$ .

**Optical rotation:**  $[\alpha]_{\text{D}}^{20} = +53$  ( $c = 1.0$ , MeOH).

**$^1\text{H NMR}$**  (500 MHz,  $\text{CDCl}_3$ )  $\delta$  7.73 – 7.69 (m, 2H), 7.60 – 7.56 (m, 2H), 7.50 – 7.42 (m, 3H), 7.42 – 7.39 (m, 1H), 7.37 – 7.33 (m, 2H), 4.37 (ddd,  $J = 12.9, 11.6, 2.4$  Hz, 1H), 4.17 (ddd,  $J = 11.6, 5.1, 1.8$  Hz, 1H), 3.44 (dd,  $J = 10.0, 2.7$  Hz, 1H), 3.28 (dd,  $J = 10.0, 5.1$  Hz, 1H), 2.29 – 2.24 (m, 2H), 2.10 (d,  $J = 1.5$  Hz, 2H), 2.01 – 1.93 (m, 2H), 1.71 – 1.62 (m, 1H), 1.55 (dd,  $J = 8.4, 2.9$  Hz,

1H), 1.52 (dt,  $J = 14.3, 2.2$  Hz, 1H), 1.47 – 1.41 (m, 1H), 1.21 (dddd,  $J = 13.3, 11.7, 4.3, 3.0$  Hz, 1H), 0.85 (s, 9H), –0.059 (s, 3H), –0.065 (s, 3H).

$^{13}\text{C}$  NMR (125 MHz,  $\text{CDCl}_3$ )  $\delta$  214.7, 135.6, 135.1, 134.8, 134.0, 130.5, 130.1, 128.14, 128.08, 65.9, 61.4, 55.0, 46.9, 41.2, 40.4, 36.6, 28.9, 26.4, 26.0, 23.8, 18.5, –5.70, –5.73.

IR (KBr):  $\nu$  ( $\text{cm}^{-1}$ ) 2955, 2927, 2855, 1728, 1470, 1428, 1258, 1180, 1108, 1064, 1018, 912, 892, 878, 861, 834, 801, 734, 705, 685.

HRMS (ESI):  $m/z$  calcd. for  $\text{C}_{29}\text{H}_{41}\text{O}_3\text{Si}_2$   $[\text{M}+\text{H}]^+$ : 493.2594, found 493.2582.

### Compound (+)-18 (minor)

TLC (petroleum ether/ethyl acetate, 10:1 v/v):  $R_f = 0.5$ .

Optical rotation:  $[\alpha]_{\text{D}}^{20} = +50$  ( $c = 1.0$ , MeOH).

$^1\text{H}$  NMR (500 MHz,  $\text{CDCl}_3$ )  $\delta$  7.76 – 7.72 (m, 2H), 7.56 – 7.53 (m, 2H), 7.51 – 7.39 (m, 4H), 7.36 – 7.33 (m, 2H), 4.30 (ddd,  $J = 12.6, 11.5, 2.5$  Hz, 1H), 4.23 (ddd,  $J = 11.4, 5.3, 2.4$  Hz, 1H), 3.38 (dd,  $J = 10.4, 4.2$  Hz, 1H), 3.30 (dd,  $J = 10.4, 8.2$  Hz, 1H), 2.69 (dt,  $J = 19.0, 2.8$  Hz, 1H), 2.21 (hept,  $J = 2.7$  Hz, 1H), 2.19 – 2.02 (m, 4H), 1.68 (dt,  $J = 15.0, 2.4$  Hz, 1H), 1.55 – 1.49 (m, 1H), 1.45 – 1.35 (m, 2H), 1.30 (dd,  $J = 8.9, 2.5$  Hz, 1H), 0.82 (s, 9H), –0.11 (d,  $J = 0.9$  Hz, 6H).

$^{13}\text{C}$  NMR (125 MHz,  $\text{CDCl}_3$ )  $\delta$  215.3, 135.5, 135.1, 134.6, 134.0, 130.5, 130.2, 128.2, 128.1, 65.2, 61.3, 44.7, 39.7, 39.0, 32.5, 29.7, 26.5, 26.0, 26.0, 25.1, 18.3, –5.51, –5.52.

IR (KBr):  $\nu$  ( $\text{cm}^{-1}$ ) 2928, 2856, 1715, 1470, 1428, 1251, 1180, 1111, 1090, 946, 885, 855, 835, 755, 737, 725, 706, 666, 640, 626.

HRMS (ESI):  $m/z$  calcd. for  $\text{C}_{29}\text{H}_{41}\text{O}_3\text{Si}_2$   $[\text{M}+\text{H}]^+$ : 493.2594, found 493.2581.

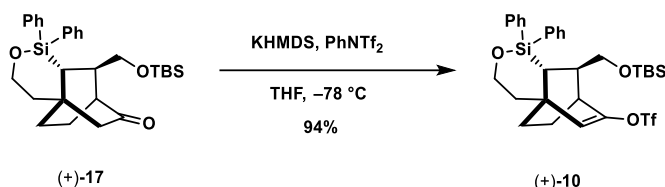

KHMDS (1M in THF, 0.84 mL, 0.84 mmol) was added to a solution of (+)-17 (300.2 mg, 0.6 mmol) in THF (8.0 mL) at –78 °C under  $\text{N}_2$  atmosphere. After stirring for 15 minutes at this temperature to ensure full deprotonation,  $\text{PhNTf}_2$  (300.0 mg, 0.84 mmol) in THF (2.0 mL) was added. The reaction mixture was stirred at the same temperature until TLC indicating full consumption of (+)-17 (ca. 30 minutes) and then quenched by sat.  $\text{NH}_4\text{Cl}$  solution. The aqueous layer was extracted with EtOAc (three times). The combined extracts were dried over anhydrous  $\text{Na}_2\text{SO}_4$ , filtered, and concentrated in *vacuo*. The resulting residue was purified by silica gel column chromatography (petroleum ether/ethyl acetate = 30:1) to afford (+)-10 (350.8 mg, 94%) as a colorless solid.

### Compound (+)-10

TLC (petroleum ether/ethyl acetate, 30:1 v/v):  $R_f = 0.30$

Optical rotation:  $[\alpha]_{\text{D}}^{20} = +53$  ( $c = 1.0$ , MeOH).

**<sup>1</sup>H NMR** (500 MHz, CDCl<sub>3</sub>) δ 7.78 – 7.73 (m, 2H), 7.54 – 7.50 (m, 2H), 7.50 – 7.44 (m, 3H), 7.42 – 7.37 (m, 1H), 7.36 – 7.30 (m, 2H), 5.84 (d, *J* = 2.5 Hz, 1H), 4.41 – 4.33 (m, 1H), 4.20 (ddd, *J* = 11.8, 5.0, 1.9 Hz, 1H), 3.15 (dd, *J* = 10.2, 4.0 Hz, 1H), 3.03 – 2.96 (m, 1H), 2.92 (p, *J* = 2.4 Hz, 1H), 2.35 – 2.21 (m, 2H), 1.86 (dt, *J* = 14.3, 2.2 Hz, 1H), 1.82 – 1.75 (m, 1H), 1.54 (tt, *J* = 12.2, 3.7 Hz, 1H), 1.15 (tdd, *J* = 9.8, 4.3, 2.5 Hz, 1H), 0.97 (tt, *J* = 12.2, 3.8 Hz, 1H), 0.82 (s, 9H), 0.72 (dd, *J* = 7.2, 3.1 Hz, 1H), –0.09 (s, 6H).

**<sup>13</sup>C NMR** (125 MHz, CDCl<sub>3</sub>) δ 149.7, 135.2, 134.7, 134.5, 133.7, 130.4, 130.1, 128.1, 128.0, 126.1, 118.6(q, *J*<sub>C-F</sub> = 318.7 Hz), 65.8, 61.3, 43.8, 40.2, 38.9, 37.2, 31.1, 26.8, 26.2, 25.8, 18.3, –5.69, –5.71.

**IR (KBr):** ν (cm<sup>-1</sup>) 2963, 2923, 2854, 1650, 1470, 1420, 1262, 1246, 1211, 1141, 1107, 1066, 1032, 903, 887, 836, 805, 777, 760, 732, 706, 670, 646, 606.

**HRMS (ESI):** *m/z* calcd. for C<sub>30</sub>H<sub>40</sub>F<sub>3</sub>O<sub>5</sub>SSi<sub>2</sub> [M+H]<sup>+</sup>: 625.2087, found 625.2072.

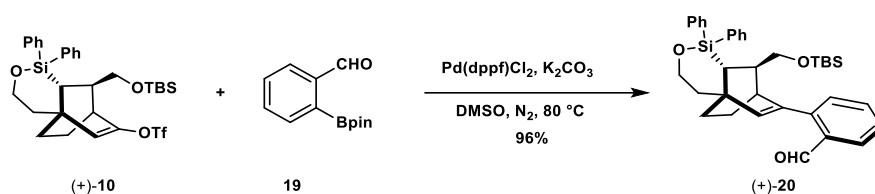

To a sealed tube were added Pd(dppf)Cl<sub>2</sub> (3.9 mg, 0.005 mmol), K<sub>2</sub>CO<sub>3</sub> (41.6 mg, 0.3 mmol), **19** (34.8 mg, 0.15 mmol), (+)-**10** (61.9 mg, 0.1 mmol) and DMSO (2.0 mL) under N<sub>2</sub> atmosphere. The resulting mixture was heated to 80 °C and stirred for 3 h. Then the reaction was cooled to 0 °C and quenched by water, extracted with EtOAc (three times). The combined organic layers were washed with brine, dried over anhydrous Na<sub>2</sub>SO<sub>4</sub>, filtered, concentrated in *vacuo*. The residue was purified by silica gel flash chromatography (petroleum ether/ethyl acetate = 10/1) to afford compound (+)-**20** (55.3 mg, 96%) as a yellow oil.

### Compound (+)-20

**TLC** (petroleum ether/ethyl acetate, 5:1 v/v): R<sub>f</sub> = 0.30.

**Optical rotation:** [α]<sub>D</sub><sup>20</sup> = +65 (c = 1.0, MeOH).

**<sup>1</sup>H NMR** (400 MHz, CD<sub>3</sub>OD) δ 10.10 (s, 1H), 7.88 – 7.82 (m, 3H), 7.70 (dd, *J* = 7.9, 1.1 Hz, 1H), 7.59 – 7.49 (m, 7H), 7.43 – 7.39 (m, 1H), 7.38 – 7.35 (m, 2H), 6.01 (d, *J* = 1.8 Hz, 1H), 4.50 – 4.40 (m, 1H), 4.19 (ddd, *J* = 11.7, 5.0, 1.9 Hz, 1H), 3.24 (q, *J* = 2.4 Hz, 1H), 3.15 – 3.07 (m, 1H), 2.93 (t, *J* = 10.5 Hz, 1H), 2.41 – 2.30 (m, 2H), 1.97 – 1.86 (m, 2H), 1.46 – 1.41 (m, 1H), 1.28 (dt, *J* = 10.0, 2.4 Hz, 1H), 1.07 – 0.99 (m, 1H), 0.80 (s, 9H), 0.66 (dd, *J* = 7.3, 2.9 Hz, 1H), –0.13 (s, 3H), –0.18 (s, 3H).

**<sup>13</sup>C NMR** (100 MHz, CD<sub>3</sub>OD) δ 192.3, 145.1, 144.5, 138.1, 135.5, 134.5, 134.4, 134.2, 133.8, 133.1, 130.1, 130.0, 128.7, 127.9, 127.6, 127.3, 126.6, 65.9, 61.2, 42.8, 38.53, 38.49, 37.6, 31.2, 26.2, 25.5, 25.0, 17.6, –6.6, –6.8.

**IR (KBr):** ν (cm<sup>-1</sup>) 2953, 2927, 2854, 1690, 1595, 1487, 1428, 1386, 1253, 1195, 1108, 1092, 1074, 1005, 962, 923, 847, 837, 775, 764, 731, 705, 682, 640.

**HRMS (ESI):** *m/z* calcd. for C<sub>36</sub>H<sub>44</sub>NaSi<sub>2</sub> [M+Na]<sup>+</sup>: 603.2721, found 603.2725.

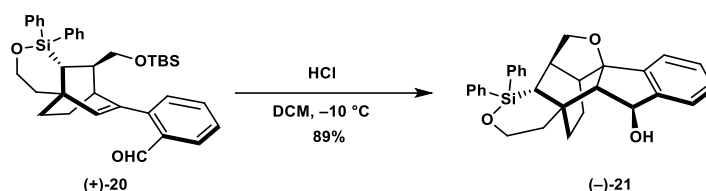

HCl (2M in EtOAc, 0.43 mL, 0.86 mmol) was added to a solution of (+)-**20** (50.7 mg, 0.086 mmol) in DCM (2.0 mL) at  $-78\text{ }^\circ\text{C}$  under  $\text{N}_2$  atmosphere. After stirring for 12 h at this temperature, the reaction was quenched by  $\text{H}_2\text{O}$ . The aqueous layer was extracted with DCM (three times). The combined extracts were dried over  $\text{Na}_2\text{SO}_4$ , filtered, and concentrated in *vacuo*. The residue was purified by silica gel flash chromatography (petroleum ether/ethyl acetate = 3/1) to afford compound (-)-**21** (41 mg, 89%) as a white solid.

### Compound (-)-21

**TLC** (petroleum ether/ethyl acetate, 2:1 v/v):  $R_f = 0.33$ .

**Optical rotation:**  $[\alpha]_{\text{D}}^{20} = -31$  ( $c = 1.0$ , MeOH).

**$^1\text{H NMR}$**  (400 MHz,  $\text{CDCl}_3$ )  $\delta$  7.78 – 7.72 (m, 2H), 7.58 (dd,  $J = 7.8, 1.8$  Hz, 2H), 7.47 – 7.39 (m, 7H), 7.35 (d,  $J = 6.5$  Hz, 3H), 4.76 (dd,  $J = 10.5, 5.9$  Hz, 1H), 4.31 (td,  $J = 12.1, 2.7$  Hz, 1H), 4.18 (ddd,  $J = 11.6, 5.1, 1.9$  Hz, 1H), 4.01 (dd,  $J = 7.3, 3.2$  Hz, 1H), 3.49 (d,  $J = 7.2$  Hz, 1H), 2.98 (d,  $J = 10.5$  Hz, 1H), 2.69 (q,  $J = 3.4$  Hz, 1H), 1.95 (q,  $J = 3.6$  Hz, 1H), 1.89 (dt,  $J = 14.5, 2.4$  Hz, 1H), 1.84 – 1.67 (m, 2H), 1.49 (d,  $J = 5.9$  Hz, 1H), 1.24 – 1.13 (m, 3H), 0.85 – 0.74 (m, 1H).

**$^{13}\text{C NMR}$**  (100 MHz,  $\text{CDCl}_3$ )  $\delta$  145.5, 140.9, 135.8, 135.3, 134.53, 134.49, 130.3, 129.9, 129.1, 128.9, 128.1, 128.1, 124.6, 124.2, 90.0, 76.6, 73.6, 71.6, 61.7, 41.5, 39.9, 36.7, 36.4, 32.7, 21.7, 15.5.

**IR (KBr):**  $\nu$  ( $\text{cm}^{-1}$ ) 3391, 2923, 1428, 1112, 1053, 1042, 1032, 1016, 996, 912, 853, 816, 758, 740, 704, 680, 670, 643.

**HRMS (ESI):**  $m/z$  calcd. for  $\text{C}_{30}\text{H}_{30}\text{O}_3\text{NaSi}$   $[\text{M}+\text{Na}]^+$ : 489.1856, found 489.1860.

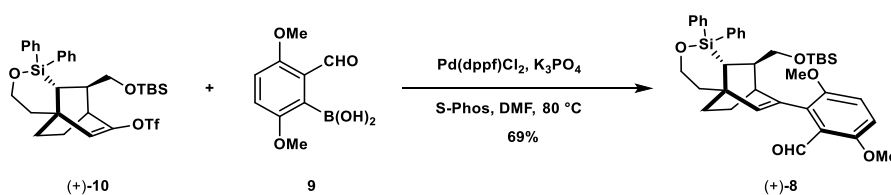

To a sealed tube were added  $\text{Pd(dppf)Cl}_2$  (36.5 mg, 0.05 mmol),  $\text{K}_3\text{PO}_4$  (0.97 g, 1.5 mmol), 2-dicyclohexylphosphino-2',6'-dimethoxybiphenyl (S-Phos, 41.2 mg, 0.1 mmol), **9** (213.2 mg, 1.0 mmol) and (+)-**10** (313.3 mg, 0.5 mmol). Degassed DMF (10 mL) were then added under  $\text{N}_2$  atmosphere. The resulting mixture was heated to  $80\text{ }^\circ\text{C}$  and stirred for 1.5 h. Then the reaction was cooled to  $0\text{ }^\circ\text{C}$  and quenched by sat.  $\text{NaHCO}_3$  solution, extracted with EtOAc (three times). The combined organic layers were washed with brine, dried over anhydrous  $\text{Na}_2\text{SO}_4$ , filtered, concentrated in *vacuo*. The residue was purified by silica gel flash chromatography (petroleum ether/ethyl acetate/ $\text{Et}_3\text{N}$  = 100/10/1) to afford compound (+)-**8** (219.1 mg, 69%) as a yellow oil.

### Compound (+)-8

**TLC** (petroleum ether/ethyl acetate, 4:1 v/v): R<sub>f</sub> = 0.32.

**Optical rotation:**  $[\alpha]_{\text{D}}^{20} = +38$  (c = 1.0, MeOH).

**<sup>1</sup>H NMR** (400 MHz, CD<sub>3</sub>OD)  $\delta$  10.19 (s, 1H), 7.83 – 7.79 (m, 2H), 7.57 – 7.53 (m, 2H), 7.52 – 7.47 (m, 3H), 7.42 – 7.38 (m, 1H), 7.37 – 7.32 (m, 2H), 7.14 (d, *J* = 9.2 Hz, 1H), 6.98 (d, *J* = 9.1 Hz, 1H), 5.95 (d, *J* = 1.6 Hz, 1H), 4.42 (ddd, *J* = 12.9, 11.6, 2.2 Hz, 1H), 4.15 (ddd, *J* = 11.7, 4.9, 1.9 Hz, 1H), 3.80 (s, 3H), 3.75 (s, 3H), 3.13 – 2.98 (m, 3H), 2.36 – 2.25 (m, 2H), 1.92 – 1.69 (m, 3H), 1.20 – 1.13 (m, 1H), 0.98 – 0.91 (m, 1H), 0.89 – 0.86 (m, 1H), 0.64 (s, 9H), –0.31 (s, 3H), –0.36 (s, 3H).

**<sup>13</sup>C NMR** (100 MHz, CD<sub>3</sub>OD)  $\delta$  192.7, 153.5, 151.7, 145.6, 136.9, 136.0, 134.6, 134.5, 134.0, 133.4, 130.0, 129.9, 127.8, 127.6, 125.3, 116.0, 110.9, 66.5, 61.2, 55.5, 55.1, 43.3, 38.7, 38.2, 37.7, 32.4, 26.7, 26.6, 25.0, 17.7, –6.8, –6.9.

**IR (KBr):**  $\nu$  (cm<sup>-1</sup>) 2922, 2851, 1697, 1658, 1632, 1587, 1470, 1428, 1252, 1218, 1191, 1150, 1109, 1093, 1033, 1010, 962, 942, 922, 851, 837, 804, 777, 735, 706, 684, 653, 605.

**HRMS (ESI):** *m/z* calcd. for C<sub>38</sub>H<sub>49</sub>F<sub>3</sub>O<sub>5</sub>Si<sub>2</sub> [M+H]<sup>+</sup>: 641.3119, found 641.3104.

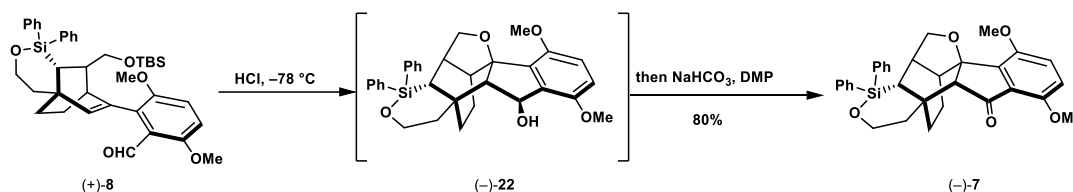

HCl (2M in EtOAc, 1.7 mL, 3.4 mmol) was added to a solution of (+)-**8** (210.0 mg, 0.33 mmol) in DCM (5 mL) at –78 °C under N<sub>2</sub> atmosphere. After stirring for 24 h at this temperature, the reaction was quenched by H<sub>2</sub>O. The aqueous layer was extracted with DCM (three times). The combined extracts were dried over Na<sub>2</sub>SO<sub>4</sub>, filtered, and concentrated in vacuo to give crude alcohol which was used for the next step without further purification.

To a solution of crude alcohol, NaHCO<sub>3</sub> (277.0 mg, 10 mmol) in DCM (10 mL) at 0 °C was added Dess-Martin periodinane (279.2 mg, 0.66 mmol) and the mixture was warmed to room temperature. The reaction was completed in 30 min, quenched by saturated aq. Na<sub>2</sub>S<sub>2</sub>O<sub>3</sub> and extracted with DCM (three times). The combined organic layers were washed with brine, dried over anhydrous Na<sub>2</sub>SO<sub>4</sub> and concentrated in *vacuo*. The resulting residue was purified by silica gel column chromatography (petroleum ether/ethyl acetate = 2:1 to 1:1) to afford (–)-**7** (138.6 mg, 80%) as a yellow solid.

### Compound (–)-**22**

**TLC** (petroleum ether/ethyl acetate, 1:1 v/v): R<sub>f</sub> = 0.35.

**Optical rotation:**  $[\alpha]_{\text{D}}^{20} = -25$  (c = 1.0, MeOH).

**<sup>1</sup>H NMR** (500 MHz, CDCl<sub>3</sub>)  $\delta$  7.79 – 7.76 (m, 2H), 7.60 – 7.57 (m, 2H), 7.44 – 7.40 (m, 3H), 7.40 – 7.37 (m, 2H), 7.36 – 7.34 (m, 1H), 6.73 (s, 2H), 5.74 (d, *J* = 8.8 Hz, 1H), 4.39 (ddd, *J* = 12.9, 11.5, 2.3 Hz, 1H), 4.17 (ddd, *J* = 11.5, 5.0, 1.8 Hz, 1H), 4.01 (dd, *J* = 7.1, 3.1 Hz, 1H), 3.81 (s, 3H), 3.77 (s, 3H), 3.53 (d, *J* = 7.1 Hz, 1H), 2.72 (q, *J* = 3.4 Hz, 1H), 2.62 (td, *J* = 4.0, 2.1 Hz, 1H), 2.32 (dt, *J* = 14.0, 2.1 Hz, 1H), 2.08 – 2.01 (m, 2H), 1.89 (td, *J* = 13.5, 5.0 Hz, 1H), 1.62 –

1.54 (m, 2H), 1.36 (t,  $J = 3.3$  Hz, 1H), 1.31 (ddd,  $J = 11.2, 4.2, 2.3$  Hz, 1H), 1.19 (dddd,  $J = 13.9, 11.2, 7.6, 2.1$  Hz, 1H).

$^{13}\text{C NMR}$  (125 MHz,  $\text{CDCl}_3$ )  $\delta$  151.6, 150.1, 136.4, 136.04, 136.03, 134.7, 134.6, 130.4, 130.1, 129.7, 128.1, 128.0, 111.7, 110.8, 93.8, 76.4, 74.4, 62.6, 62.0, 56.1, 55.5, 39.14, 39.11, 38.1, 36.7, 34.6, 22.7, 16.7.

**IR (KBr):**  $\nu$  ( $\text{cm}^{-1}$ ) 2923, 2853, 1495, 1463, 1428, 1282, 1260, 1186, 1112, 1075, 1093, 1040, 1019, 980, 943, 911, 863, 798, 759, 735, 702, 661.

**HRMS (ESI):**  $m/z$  calcd. for  $\text{C}_{32}\text{H}_{35}\text{O}_5\text{Si}$   $[\text{M}+\text{H}]^+$ : 527.2248, found 527.2253.

### Compound (–)-7

**TLC** (petroleum ether/ethyl acetate, 1:1 v/v):  $R_f = 0.26$ .

**Optical rotation:**  $[\alpha]_{\text{D}}^{20} = -13$  ( $c = 1.0$ , MeOH).

$^1\text{H NMR}$  (500 MHz,  $\text{CDCl}_3$ )  $\delta$  7.77 – 7.75 (m, 2H), 7.59 – 7.57 (m, 2H), 7.46 – 7.40 (m, 4H), 7.38– 7.35 (m, 2H), 7.05 (d,  $J = 8.8$  Hz, 1H), 6.82 (d,  $J = 8.8$  Hz, 1H), 4.33 (td,  $J = 12.4, 2.4$  Hz, 1H), 4.20 (ddd,  $J = 11.7, 5.1, 1.8$  Hz, 1H), 4.14 – 4.12 (m, 1H), 3.88 (s, 3H), 3.83 (s, 3H), 3.62 (d,  $J = 7.4$  Hz, 1H), 2.76 (q,  $J = 3.4$  Hz, 1H), 2.72 (dt,  $J = 14.5, 2.2$  Hz, 1H), 2.59 (q,  $J = 3.3$  Hz, 1H), 2.28 (d,  $J = 2.3$  Hz, 1H), 1.99 – 1.92 (m, 1H), 1.67 – 1.59 (m, 1H), 1.47 (t,  $J = 3.0$  Hz, 1H), 1.23 – 1.12 (m, 2H), 0.87 – 0.81 (m, 1H).

$^{13}\text{C NMR}$  (125 MHz,  $\text{CDCl}_3$ )  $\delta$  201.1, 151.42, 151.41, 140.6, 135.7, 135.4, 134.60, 134.57, 130.4, 130.0, 128.2, 128.1, 127.9, 118.6, 111.8, 86.0, 77.2, 67.5, 61.9, 56.4, 56.1, 38.7, 38.5, 37.0, 36.6, 35.4, 21.2, 15.9.

**IR (KBr):**  $\nu$  ( $\text{cm}^{-1}$ ) 2925, 2866, 1707, 1590, 1495, 1464, 1428, 1286, 1266, 1238, 1195, 1113, 1092, 1078, 1061, 1039, 952, 939, 856, 811, 767, 741, 702, 620.

**HRMS (ESI):**  $m/z$  calcd. for  $\text{C}_{32}\text{H}_{33}\text{O}_5\text{Si}$   $[\text{M}+\text{H}]^+$ : 525.2097, found 525.2079.

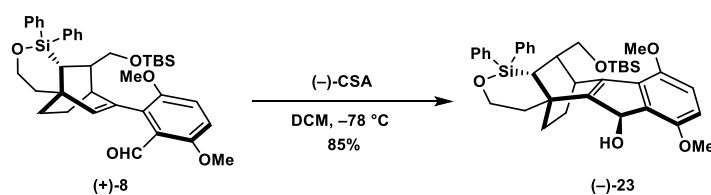

(–)-CSA (23.6 mg, 0.1 mmol) was added to a solution of (+)-**8** (64.5 mg, 0.1 mmol) in DCM (1.0 mL) at  $-78\text{ }^\circ\text{C}$  under  $\text{N}_2$  atmosphere. After stirring for 12 h at this temperature, the reaction was quenched by  $\text{H}_2\text{O}$ . The aqueous layer was extracted with DCM (three times). The combined extracts were dried over  $\text{Na}_2\text{SO}_4$ , filtered, and concentrated in *vacuo*. The resulting residue was purified by silica gel column chromatography (petroleum ether/ethyl acetate = 8:1) to afford (–)-**23** (55.1 mg, 85%) as a yellow oil.

### Compound (–)-23

**TLC** (petroleum ether/ethyl acetate, 5:1 v/v):  $R_f = 0.25$ .

**Optical rotation:**  $[\alpha]_{\text{D}}^{20} = -55$  ( $c = 1.0$ , MeOH).



**<sup>1</sup>H NMR** (400 MHz, CDCl<sub>3</sub>) δ 7.86 (dt, *J* = 5.0, 2.5 Hz, 2H), 7.61 – 7.55 (m, 2H), 7.50 (dd, *J* = 5.8, 1.7 Hz, 3H), 7.41 – 7.30 (m, 3H), 6.76 (d, *J* = 8.9 Hz, 1H), 6.63 (d, *J* = 8.8 Hz, 1H), 5.51 (s, 1H), 4.51 (td, *J* = 12.1, 2.8 Hz, 1H), 4.31 (ddd, *J* = 11.7, 5.0, 2.1 Hz, 1H), 3.89 (s, 3H), 3.78 (s, 3H), 3.73 (q, *J* = 2.9 Hz, 1H), 3.02 (dd, *J* = 10.0, 3.9 Hz, 1H), 2.82 (t, *J* = 9.5 Hz, 1H), 2.58 – 2.41 (m, 2H), 2.36 – 2.29 (m, 1H), 2.00 (td, *J* = 9.0, 8.3, 5.1 Hz, 1H), 1.42 (dt, *J* = 12.1, 4.0 Hz, 1H), 1.08 (tt, *J* = 13.6, 4.7 Hz, 1H), 0.95 – 0.89 (m, 1H), 0.77 (s, 9H), 0.70 – 0.64 (m, 1H), –0.18 (s, 3H), –0.21 (s, 3H).

**<sup>13</sup>C NMR** (100 MHz, CDCl<sub>3</sub>) δ 151.4, 150.2, 148.5, 142.4, 136.2, 134.9, 134.5, 133.2, 131.5, 130.0, 130.0, 129.8, 127.9, 127.8, 113.2, 108.7, 73.6, 66.7, 61.5, 56.3, 55.7, 43.8, 39.1, 35.3, 33.1, 32.9, 27.7, 26.4, 25.8, 18.2, –5.6, –5.9.

**IR (KBr):** ν (cm<sup>-1</sup>) 3480, 2935, 2855, 1494, 1463, 1428, 1257, 1185, 1112, 1057, 1033, 867, 837, 777, 736, 721, 702, 661, 620.

**HRMS (ESI):** *m/z* calcd. for C<sub>38</sub>H<sub>48</sub>O<sub>5</sub>NaSi<sub>2</sub> [M+Na]<sup>+</sup>: 663.2932, found 663.2932.

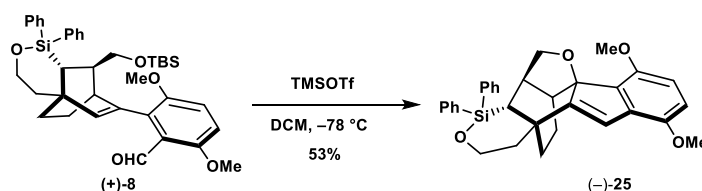

TMSOTf (18 μL, 0.1 mmol) was added to a solution of (+)-**8** (64.2 mg, 0.1 mmol) in DCM (5.0 mL) at –78 °C under N<sub>2</sub> atmosphere. After stirring for 12 h at this temperature, the reaction was quenched by H<sub>2</sub>O. The aqueous layer was extracted with DCM (three times). The combined extracts were dried over Na<sub>2</sub>SO<sub>4</sub>, filtered, and concentrated in *vacuo*. The resulting residue was purified by silica gel column chromatography (petroleum ether/ethyl acetate = 5:1) to afford (–)-**25** (27.1 mg, 53%) as a yellow solid.

### Compound (–)-**25**

**TLC** (petroleum ether/ethyl acetate, 5:1 v/v): R<sub>f</sub> = 0.30.

**Optical rotation:** [α]<sub>D</sub><sup>20</sup> = –23 (c = 1.0, MeOH).

**<sup>1</sup>H NMR** (400 MHz, CDCl<sub>3</sub>) δ 7.82 – 7.76 (m, 2H), 7.58 (dt, *J* = 6.5, 1.7 Hz, 2H), 7.48 – 7.42 (m, 3H), 7.42 – 7.33 (m, 3H), 6.73 (d, *J* = 8.9 Hz, 1H), 6.59 (d, *J* = 8.9 Hz, 1H), 6.28 (s, 1H), 4.38 (td, *J* = 13.0, 12.3, 2.4 Hz, 1H), 4.27 (ddd, *J* = 11.7, 5.2, 1.9 Hz, 1H), 4.06 (dd, *J* = 6.8, 2.5 Hz, 1H), 3.80 (s, 3H), 3.78 (s, 3H), 3.54 (d, *J* = 6.8 Hz, 1H), 3.05 – 3.00 (m, 1H), 2.85 (q, *J* = 3.6 Hz, 1H), 2.26 (td, *J* = 13.6, 13.0, 5.2 Hz, 1H), 2.11 – 2.03 (m, 1H), 1.97 (dt, *J* = 14.2, 2.2 Hz, 1H), 1.87 (t, *J* = 3.2 Hz, 1H), 1.61 – 1.54 (m, 1H), 1.17 – 1.09 (m, 2H).

**<sup>13</sup>C NMR** (100 MHz, CDCl<sub>3</sub>) δ 159.9, 151.3, 147.6, 135.5, 135.4, 134.6, 134.5, 133.9, 131.0, 130.3, 129.9, 128.1, 128.0, 116.6, 113.4, 110.0, 92.3, 76.1, 61.6, 56.3, 56.1, 40.5, 38.1, 37.2, 35.6, 34.9, 32.4, 16.6.

**IR (KBr):** ν (cm<sup>-1</sup>) 2921, 2851, 1659, 1632, 1494, 1462, 1428, 1289, 1271, 1259, 1211, 1084, 1112, 1081, 1038, 1010, 979, 965, 942, 924, 897, 865, 844, 807, 767, 737, 708, 681.

**HRMS (ESI):** *m/z* calcd. for C<sub>32</sub>H<sub>33</sub>O<sub>4</sub>Si [M+H]<sup>+</sup>: 509.2142, found 509.2147.

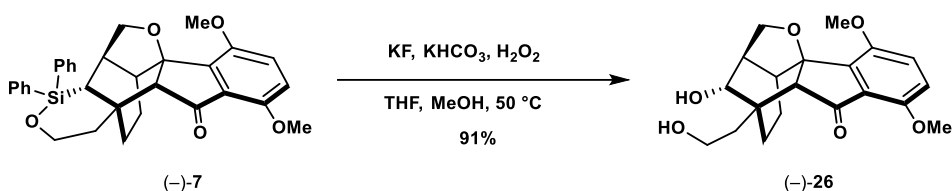

To a solution of (-)-7 (131.4 mg, 0.25 mmol), KF (72.5 mg, 1.25 mmol), KHCO<sub>3</sub> (40.1 mg, 0.4 mmol) in MeOH/THF (1:1, 5.0 mL) was added H<sub>2</sub>O<sub>2</sub> (30% wt with H<sub>2</sub>O, 0.64 mL, 5.0 mmol) at room temperature. The mixture was warmed to 50 °C, and stirred for 12 h. Then the reaction mixture was cooled to 0 °C, quenched by saturated aq. Na<sub>2</sub>S<sub>2</sub>O<sub>3</sub> and extracted with EtOAc (three times). The combined organic layers were washed with brine, dried over anhydrous Na<sub>2</sub>SO<sub>4</sub>, filtered, and concentrated in *vacuo*. The resulting residue was purified by silica gel column chromatography (pure ethyl acetate) to afford (-)-26 (83.3 mg, 91%) as a colorless oil.

### Compound (-)-26

**TLC** (pure ethyl acetate): R<sub>f</sub> = 0.4.

**Optical rotation:**  $[\alpha]_{\text{D}}^{20} = -24$  (c = 1.0, MeOH).

**<sup>1</sup>H NMR** (500 MHz, CDCl<sub>3</sub>) δ 7.06 (d, *J* = 8.8 Hz, 1H), 6.83 (d, *J* = 8.8 Hz, 1H), 4.15 (dd, *J* = 7.9, 4.4 Hz, 1H), 3.88 (s, 3H), 3.83 (s, 3H), 3.81 (dd, *J* = 6.1, 3.2 Hz, 1H), 3.77 – 3.72 (m, 2H), 3.61 (s, 1H), 2.65 – 2.63 (m, 1H), 2.41 (ddd, *J* = 15.6, 6.0, 2.4 Hz, 1H), 2.33 (t, *J* = 4.2 Hz, 1H), 2.19 (d, *J* = 1.8 Hz, 1H), 1.96 (ddd, *J* = 15.6, 9.3, 3.2 Hz, 1H), 1.79 – 1.69 (m, 2H), 1.05 – 0.96 (m, 2H).

**<sup>13</sup>C NMR** (125 MHz, CDCl<sub>3</sub>) δ 201.7, 151.4, 151.3, 140.0, 128.0, 118.8, 112.0, 86.1, 78.2, 73.6, 59.5, 58.5, 56.4, 56.0, 46.0, 39.3, 37.5, 36.4, 17.9, 15.8.

**IR (KBr):** ν (cm<sup>-1</sup>) 3375, 2962, 2921, 2851, 1704, 1497, 1465, 1260, 1099, 1032, 860, 799, 706, 625, 606.

**HRMS (ESI):** *m/z* calcd. for C<sub>20</sub>H<sub>25</sub>O<sub>6</sub> [M+H]<sup>+</sup>: 361.1651, found 361.1638.

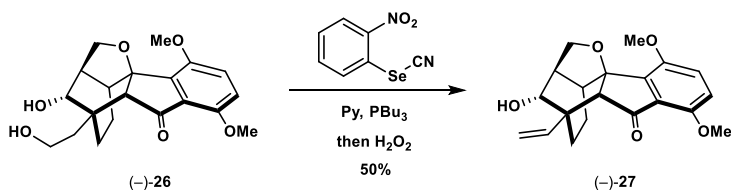

To a solution of (-)-26 (73.5 mg, 0.2 mmol), 2-nitrophenylselenocyanate (55.1 mg, 0.24 mmol) and pyridine (20 μL, 0.24 mmol) in dry THF (5.0 mL) PBU<sub>3</sub> (60 μL, 0.24 mmol) was added dropwise at room temperature. Upon consumption of the starting material as indicated by TLC, H<sub>2</sub>O<sub>2</sub> (30% wt with H<sub>2</sub>O, 0.6 mL, 4.8 mmol) was added into this mixture and stirred for 12 h. Then the reaction mixture was cooled to 0 °C, quenched by saturated aq. Na<sub>2</sub>S<sub>2</sub>O<sub>3</sub> and extracted with EtOAc (three times). The combined organic layers were washed with brine, dried over anhydrous Na<sub>2</sub>SO<sub>4</sub>, filtered, and concentrated in *vacuo*. The resulting residue was purified by silica gel column chromatography (petroleum ether/ethyl acetate = 1:1) to afford (-)-27 (34.0 mg, 50%) as a colorless solid.

### Compound (-)-27

**TLC** (petroleum ether/ethyl acetate, 1:1 v/v):  $R_f = 0.15$ .

**Optical rotation:**  $[\alpha]_D^{20} = -40$  ( $c = 1.0$ ,  $\text{CHCl}_3$ ).

**$^1\text{H NMR}$**  (500 MHz,  $\text{CDCl}_3$ )  $\delta$  7.07 (d,  $J = 8.9$  Hz, 1H), 6.85 (d,  $J = 8.8$  Hz, 1H), 6.01 (dd,  $J = 17.6, 10.9$  Hz, 1H), 5.35 (dd,  $J = 10.9, 1.0$  Hz, 1H), 5.13 (dd,  $J = 17.6, 1.1$  Hz, 1H), 4.22 (dd,  $J = 8.1, 4.5$  Hz, 1H), 3.88 (s, 3H), 3.85 (s, 3H), 3.79 – 3.76 (d,  $J = 7.6$  Hz, 1H), 3.55 (s, 1H), 2.70 (q,  $J = 3.2$  Hz, 1H), 2.42 (t,  $J = 4.2$  Hz, 1H), 2.33 (d,  $J = 1.8$  Hz, 1H), 1.92 (d,  $J = 1.6$  Hz, 1H), 1.83 – 1.74 (m, 2H), 1.23 – 1.17 (m, 1H), 1.10 – 1.02 (m, 1H).

**$^{13}\text{C NMR}$**  (125 MHz,  $\text{CDCl}_3$ )  $\delta$  199.6, 151.52, 151.45, 142.4, 139.6, 128.1, 118.8, 116.0, 112.4, 85.8, 73.6, 61.9, 56.5, 56.5, 56.1, 44.8, 42.6, 37.8, 15.48, 15.47.

**IR (KBr):**  $\nu$  ( $\text{cm}^{-1}$ ) 3402, 2963, 2921, 2851, 1705, 1591, 1496, 1463, 1418, 1264, 1100, 1055, 1032, 913, 868, 806, 708, 662.

**HRMS (ESI):**  $m/z$  calcd. for  $\text{C}_{20}\text{H}_{23}\text{O}_5$   $[\text{M}+\text{H}]^+$ : 343.1545, found 343.1534.

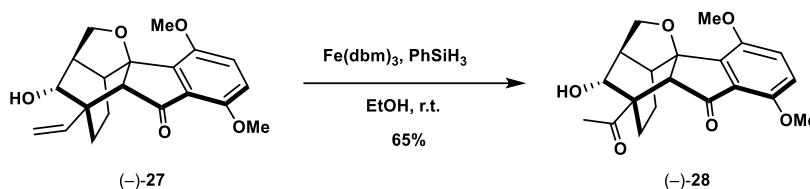

To a solution of (–)-**27** (34.0 mg, 0.1 mmol) in EtOH (3.0 mL) was added  $\text{FeCl}_3$  (1.7 mg, 0.01 mmol) followed by the addition of dibenzoylmethane (2.3mg, 0.01 mmol) while the reaction mixture was stirred open to air. After 5 min,  $\text{PhSiH}_3$  (120  $\mu\text{L}$ , 1.0 mmol) was added in one portion, and the solution was stirred at room temperature for 2 h. The reaction mixture was then quenched by water, extracted with EtOAc (three times). The combined organic layers were washed with brine, dried over anhydrous  $\text{Na}_2\text{SO}_4$ , filtered, and concentrated *in vacuo*. The crude product was purified by silica gel column chromatography (petroleum ether/ethyl acetate = 1:3) to afford (–)-**28** (23.1 mg, 65%) as a colorless solid.

### Compound (–)-**28**

**TLC** (pure ethyl acetate):  $R_f = 0.25$ .

**Optical rotation:**  $[\alpha]_D^{20} = -41$  ( $c = 1.0$ ,  $\text{CHCl}_3$ ).

**$^1\text{H NMR}$**  (500 MHz,  $\text{CDCl}_3$ )  $\delta$  7.10 (d,  $J = 8.2$  Hz, 1H), 6.68 (d,  $J = 8.8$  Hz, 1H), 4.21 (dd,  $J = 8.3, 4.6$  Hz, 1H), 3.97 – 3.95 (m, 1H), 3.90 (s, 3H), 3.85 (s, 3H), 3.79 (d,  $J = 8.2$  Hz, 1H), 2.92 (d,  $J = 2.3$  Hz, 1H), 2.71 (q,  $J = 3.4$  Hz, 1H), 2.42 – 2.36 (m, 1H), 2.38 (s, 3H), 2.19 – 2.12 (m, 1H), 2.01 (q,  $J = 6.8$  Hz, 1H), 1.83 (ddt,  $J = 14.4, 12.1, 3.9$  Hz, 1H), 1.45 – 1.40 (m, 1H), 1.07 (ddd,  $J = 14.3, 5.1, 2.6$  Hz, 1H).

**$^{13}\text{C NMR}$**  (125 MHz,  $\text{CDCl}_3$ )  $\delta$  213.7, 199.4, 151.52, 151.46, 139.5, 127.5, 119.2, 112.4, 85.4, 77.8, 73.1, 61.6, 56.5, 56.1, 51.3, 47.4, 37.7, 28.8, 15.4, 14.9.

**IR (KBr):**  $\nu$  ( $\text{cm}^{-1}$ ) 3355, 2955, 2923, 2853, 1709, 1593, 1497, 1462, 1288, 1271, 1261, 1097, 1053, 1032, 801, 708.

**HRMS (ESI):**  $m/z$  calcd. for  $\text{C}_{20}\text{H}_{23}\text{O}_6$   $[\text{M}+\text{H}]^+$ : 359.1495, found 359.1551.

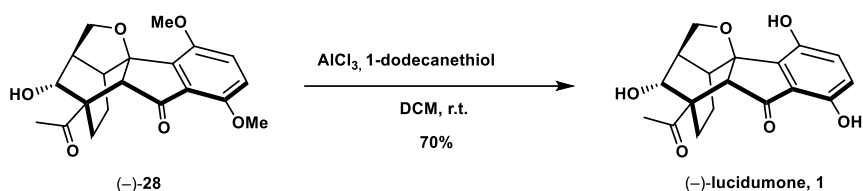

To a Schlenk tube were added  $\text{AlCl}_3$  (330.2 mg, 2.5 mmol) under  $\text{N}_2$  atmosphere followed by the addition of (-)-**28** (17.5 mg in 2.0 mL DCM, 0.05 mmol) at 0 °C, then 1-dodecanethiol (0.6 mL, 2.5 mmol) was added to this mixture, and the reaction mixture was allowed to stir at 25 °C for 5 h. Upon completion, the solution was quenched by water (5.0 mL), extracted with EtOAc (three times), and the combined organic layers were washed with brine, dried over anhydrous  $\text{Na}_2\text{SO}_4$ , filtered, and concentrated *in vacuo*. The crude product was purified by silica gel column chromatography (petroleum ether/ethyl acetate = 1:1) to afford (-)-**lucidumone** (8.1 mg, 70%) as a brown solid.

### (-)-Lucidumone [(-)-**1**]

**TLC** (petroleum ether/ethyl acetate, 1:1 v/v):  $R_f = 0.10$ .

**Optical rotation:**  $[\alpha]_{\text{D}}^{20} = -62$  ( $c = 1.0$ , MeOH).

**$^1\text{H NMR}$**  (500 MHz,  $\text{CD}_3\text{OD}$ )  $\delta$  7.02 (d,  $J = 8.8$  Hz, 1H), 6.76 (d,  $J = 8.7$  Hz, 1H), 4.26 (dd,  $J = 8.3, 4.9$  Hz, 1H), 3.92 – 3.89 (m, 1H), 3.78 (d,  $J = 8.4$  Hz, 1H), 2.89 (d,  $J = 2.3$  Hz, 1H), 2.70 (q-like, (3.3) 1H), 2.36 (t-like, (4.6) 1H), 2.29 (s, 3H), 2.21 – 2.15 (m, 1H), 1.92 – 1.83 (m, 1H), 1.38 – 1.32 (m, 1H), 1.07 (dddd,  $J = 14.7, 11.9, 4.9, 2.7$  Hz, 1H).

**$^{13}\text{C NMR}$**  (125 MHz,  $\text{CD}_3\text{OD}$ )  $\delta$  214.8, 204.3, 150.8, 149.5, 135.4, 126.4, 125.4, 118.6, 87.4, 79.5, 74.3, 62.4, 52.7, 48.7, 39.1, 28.5, 16.2, 15.9.

**IR (KBr):**  $\nu$  ( $\text{cm}^{-1}$ ) 3355, 3186, 2919, 2849, 1697, 1659, 1632, 1495, 1470, 1423, 1296, 1262, 1190, 1051.

**HRMS (ESI):**  $m/z$  calcd. for  $\text{C}_{18}\text{H}_{19}\text{O}_6$   $[\text{M}+\text{H}]^+$ : 331.1182, found 331.1177.

### 3.2 NMR spectra and HPLC spectra

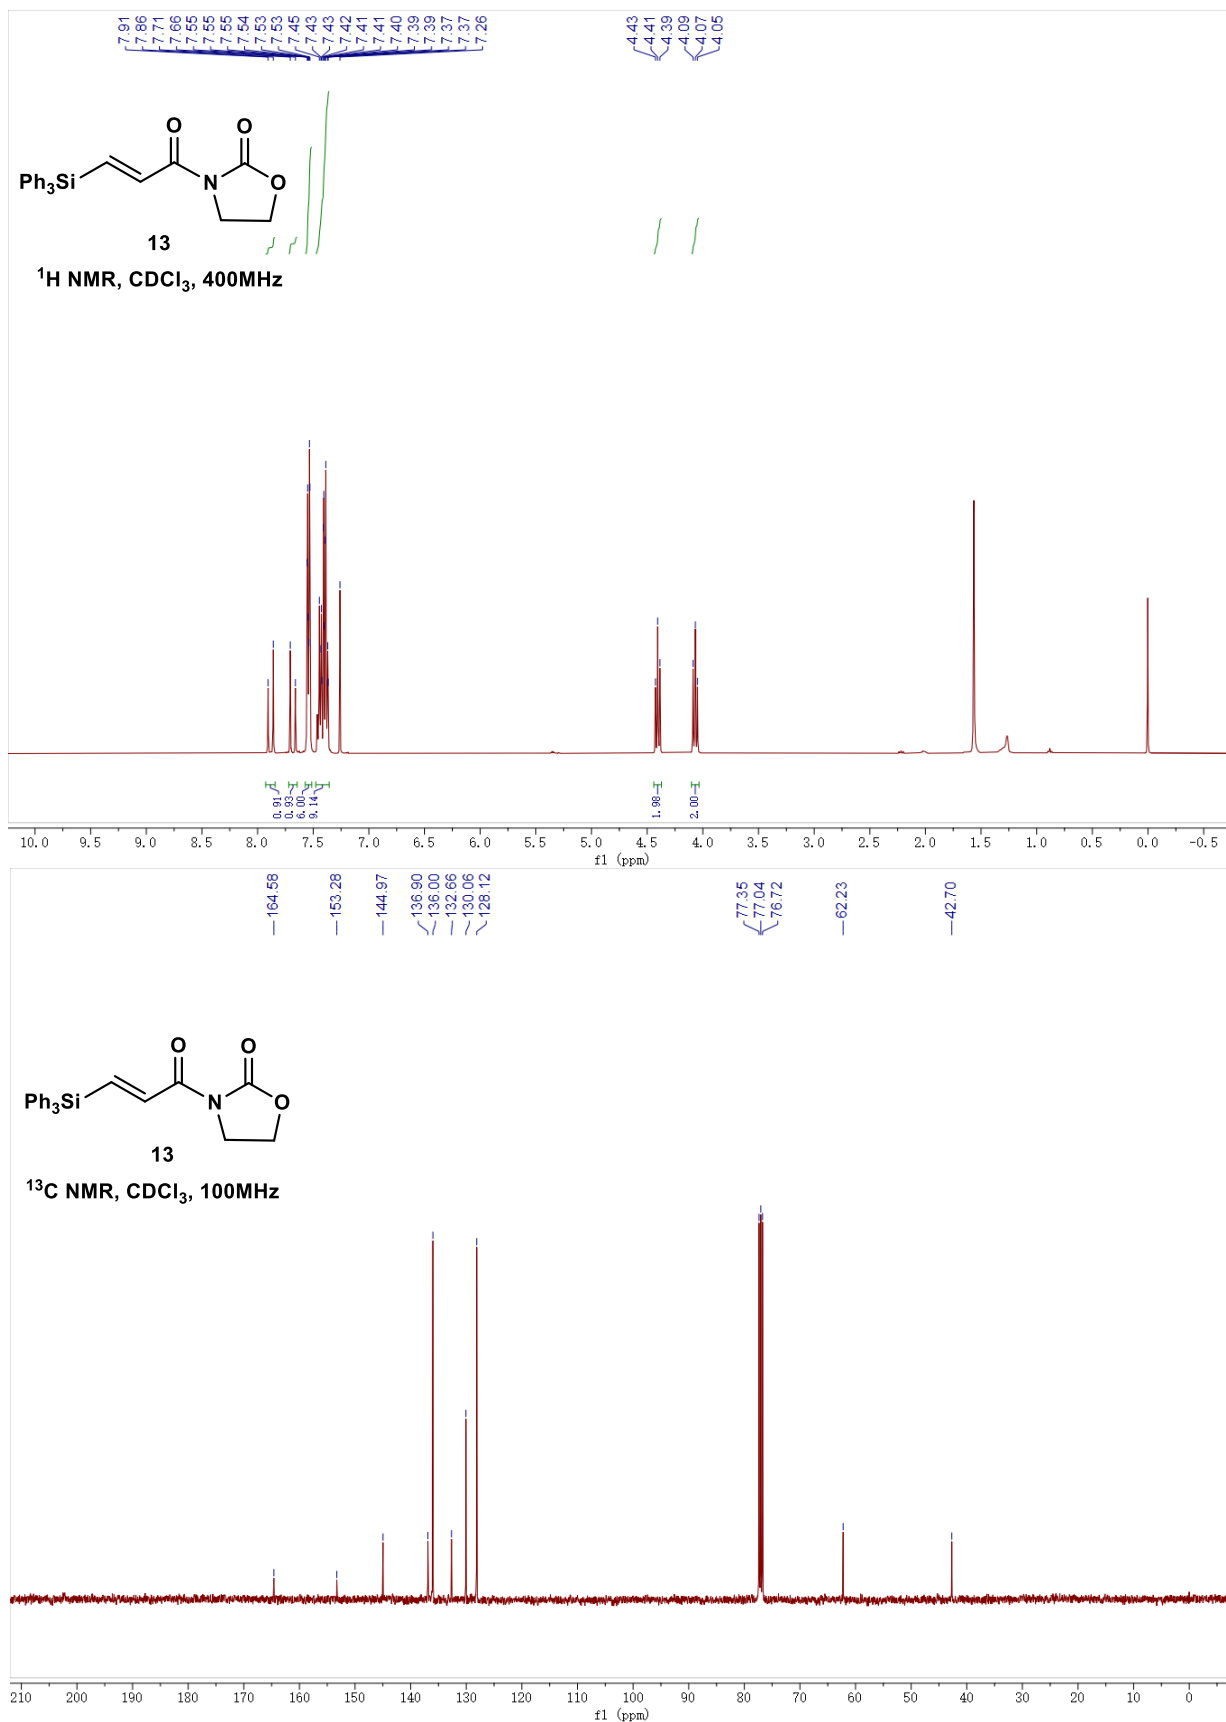

Supplementary Figure 3. NMR spectra of compound 13

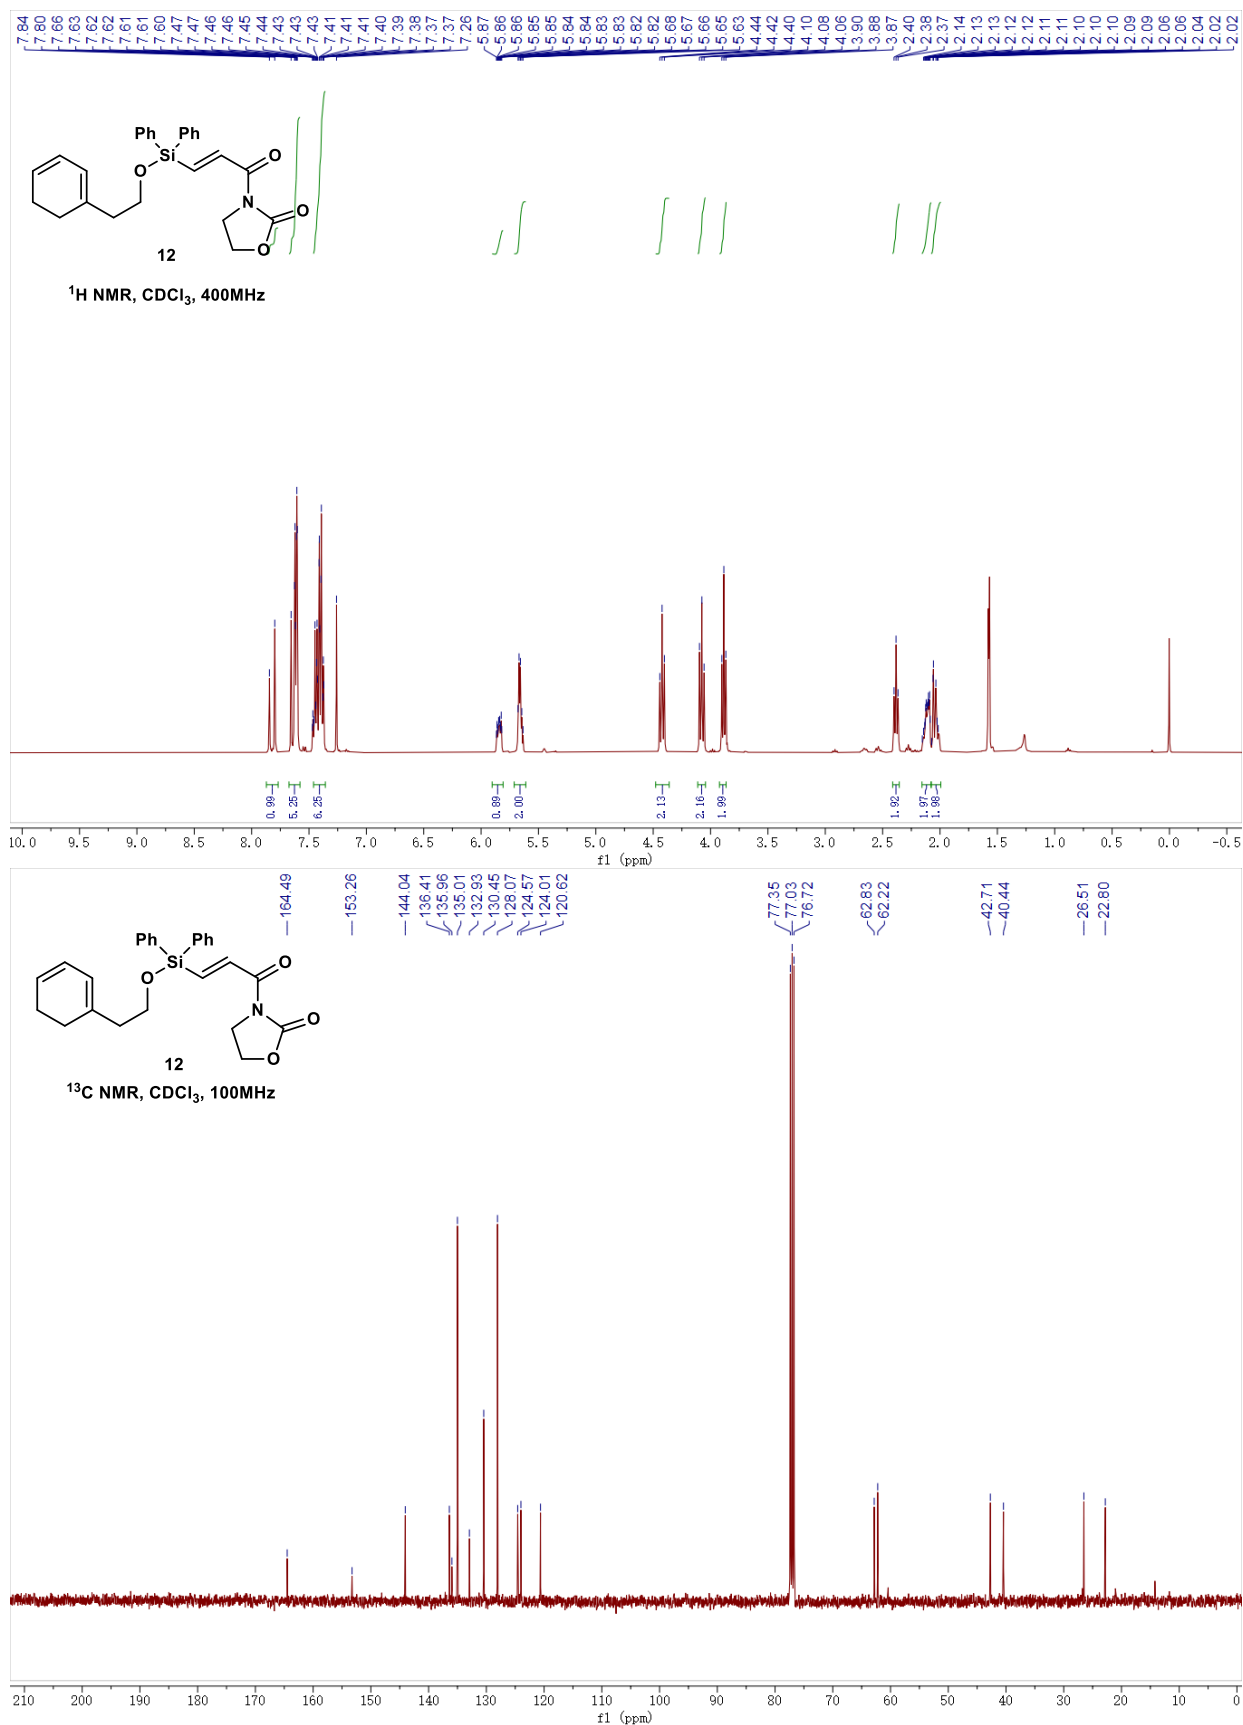

Supplementary Figure 4. NMR spectra of compound 12

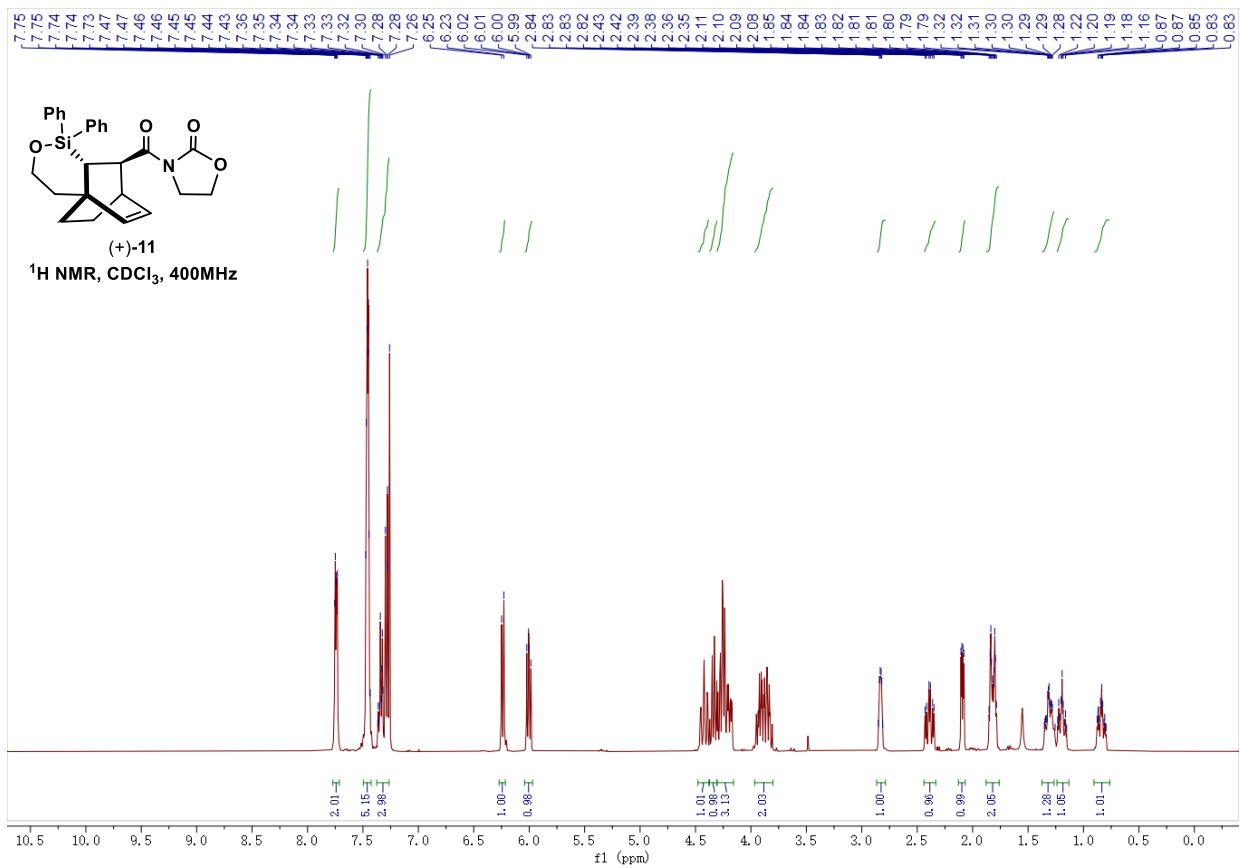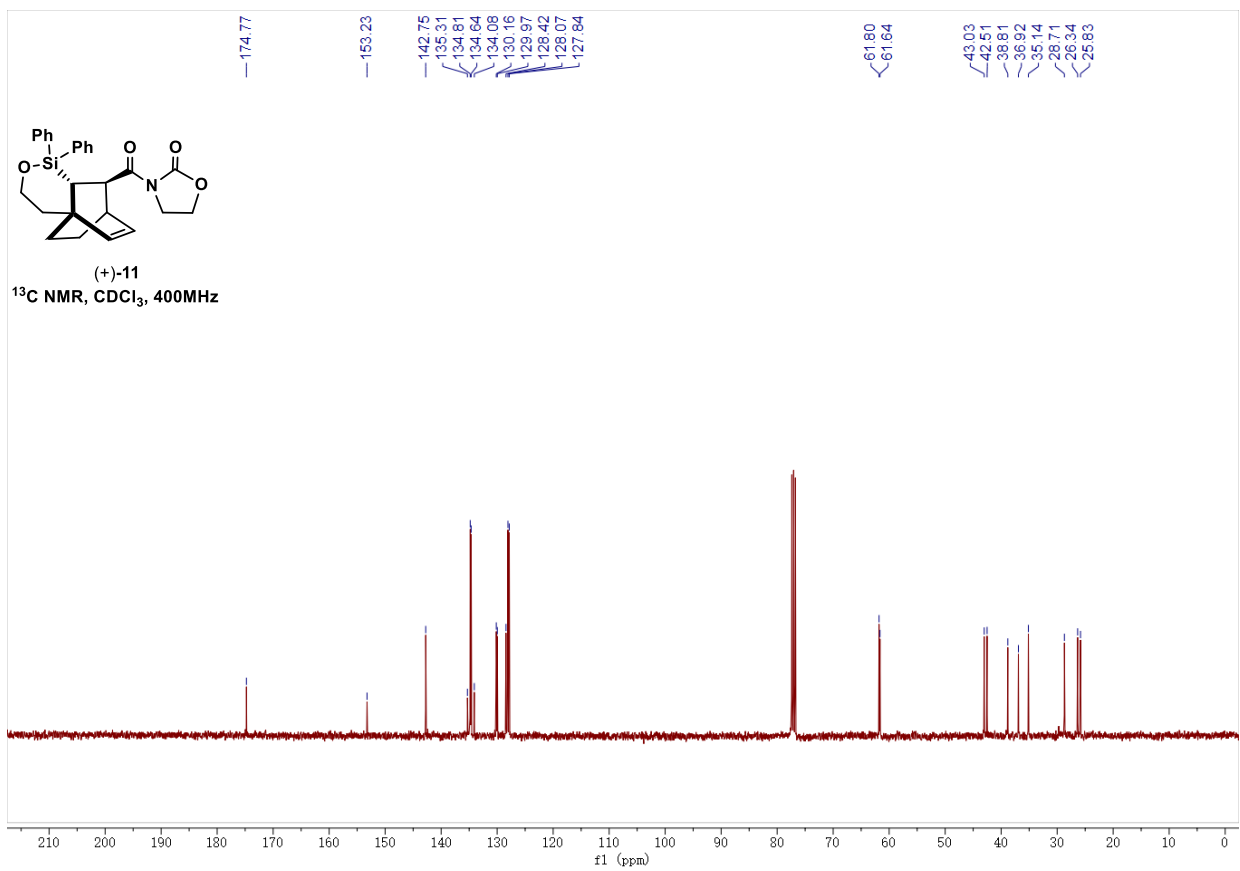

Supplementary Figure 5. NMR spectra of compound (+)-11

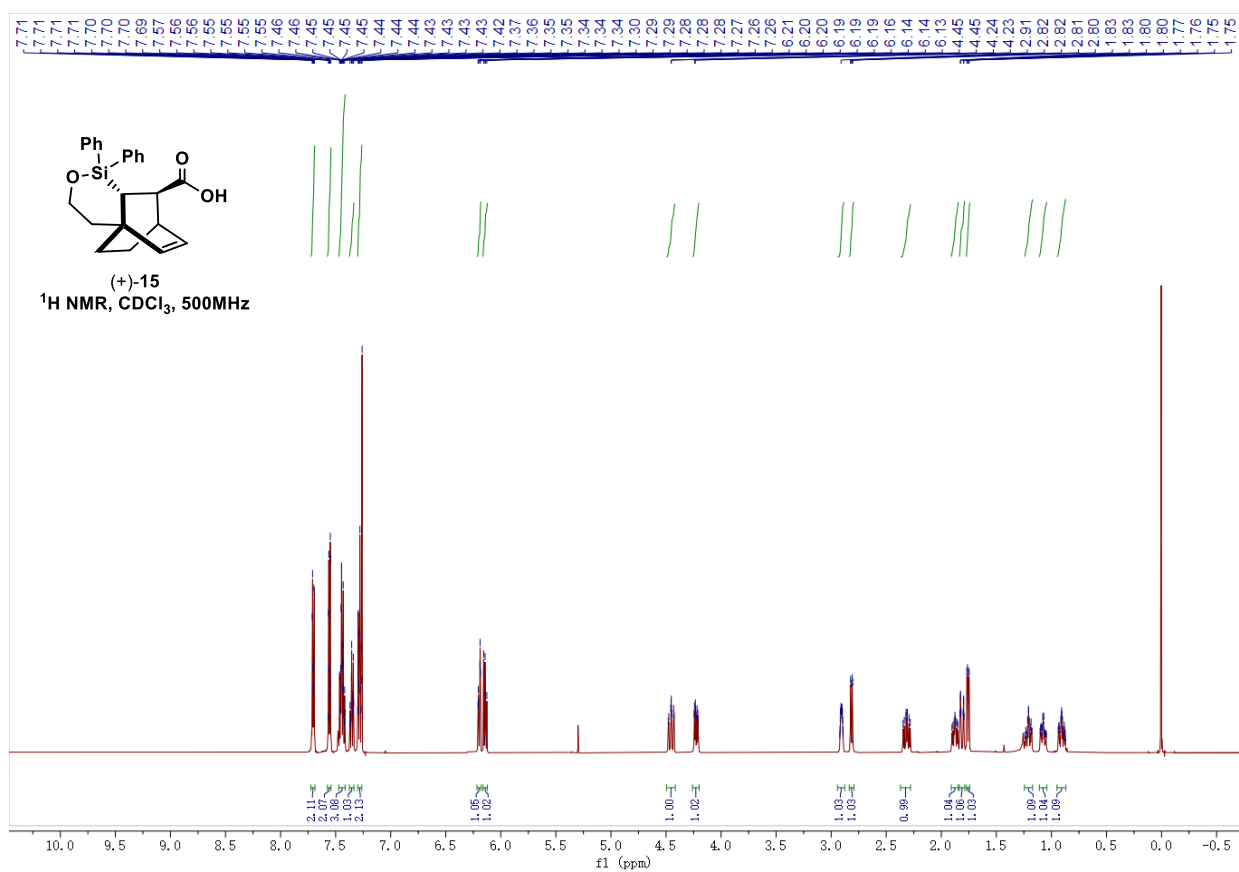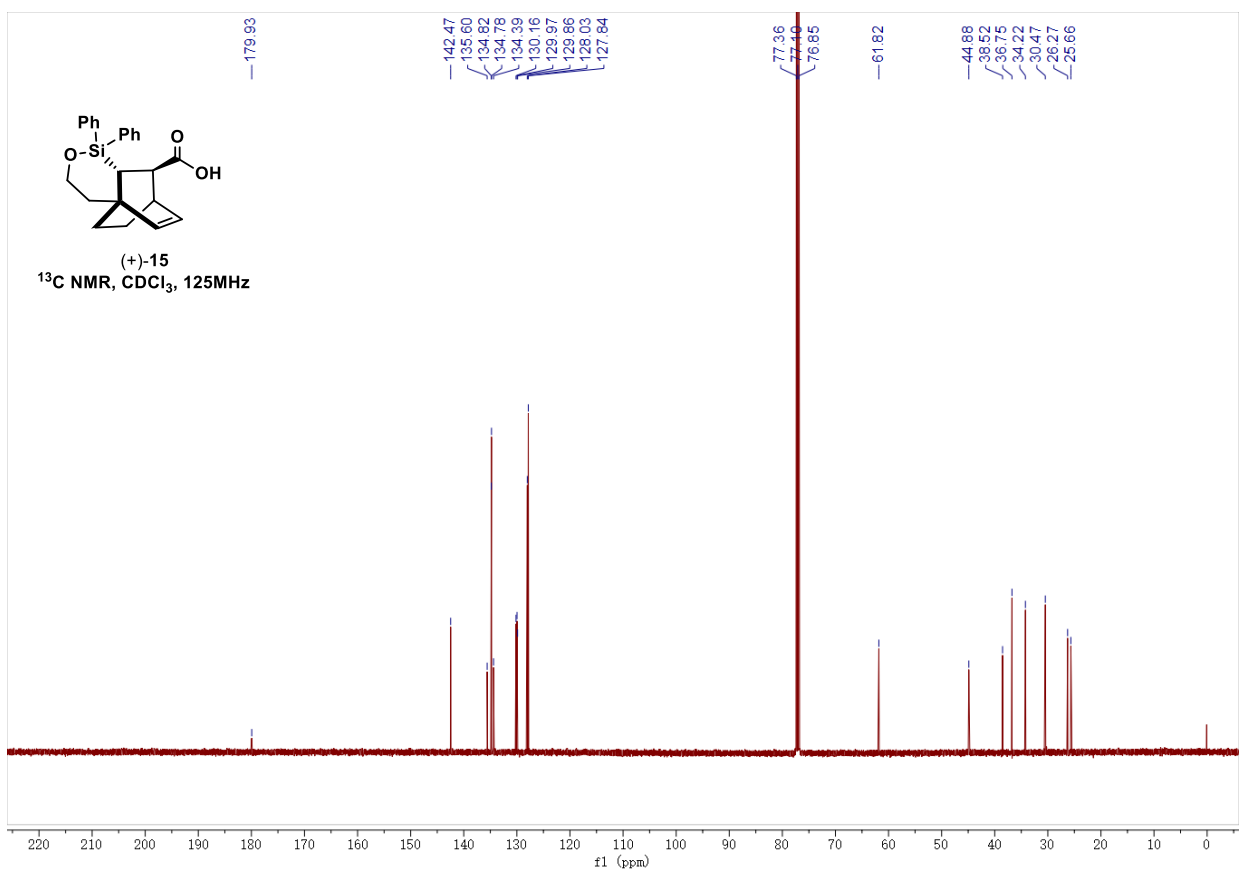

Supplementary Figure 6. NMR spectra of compound (+)-15



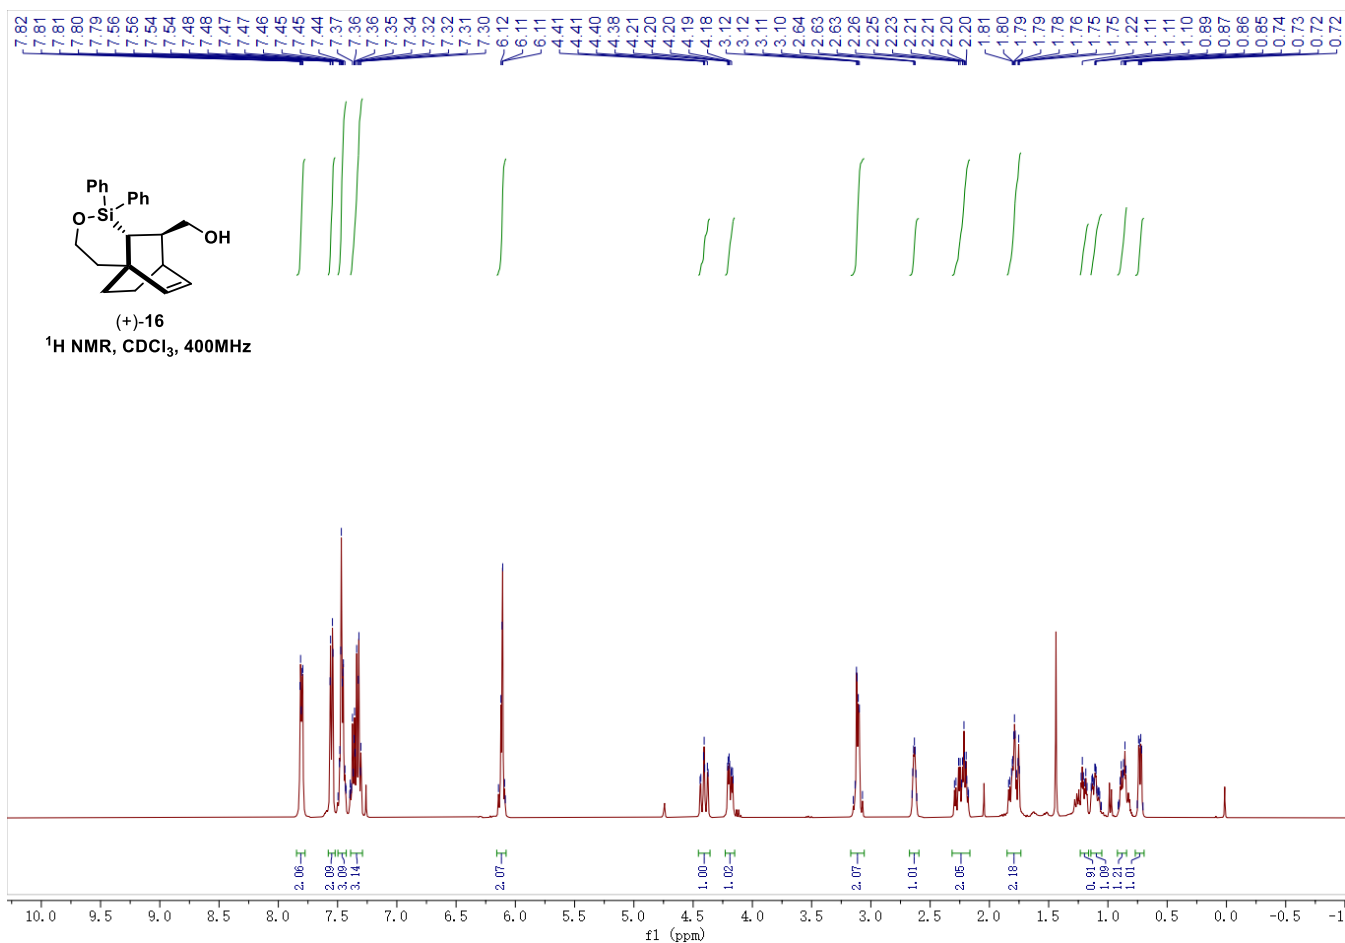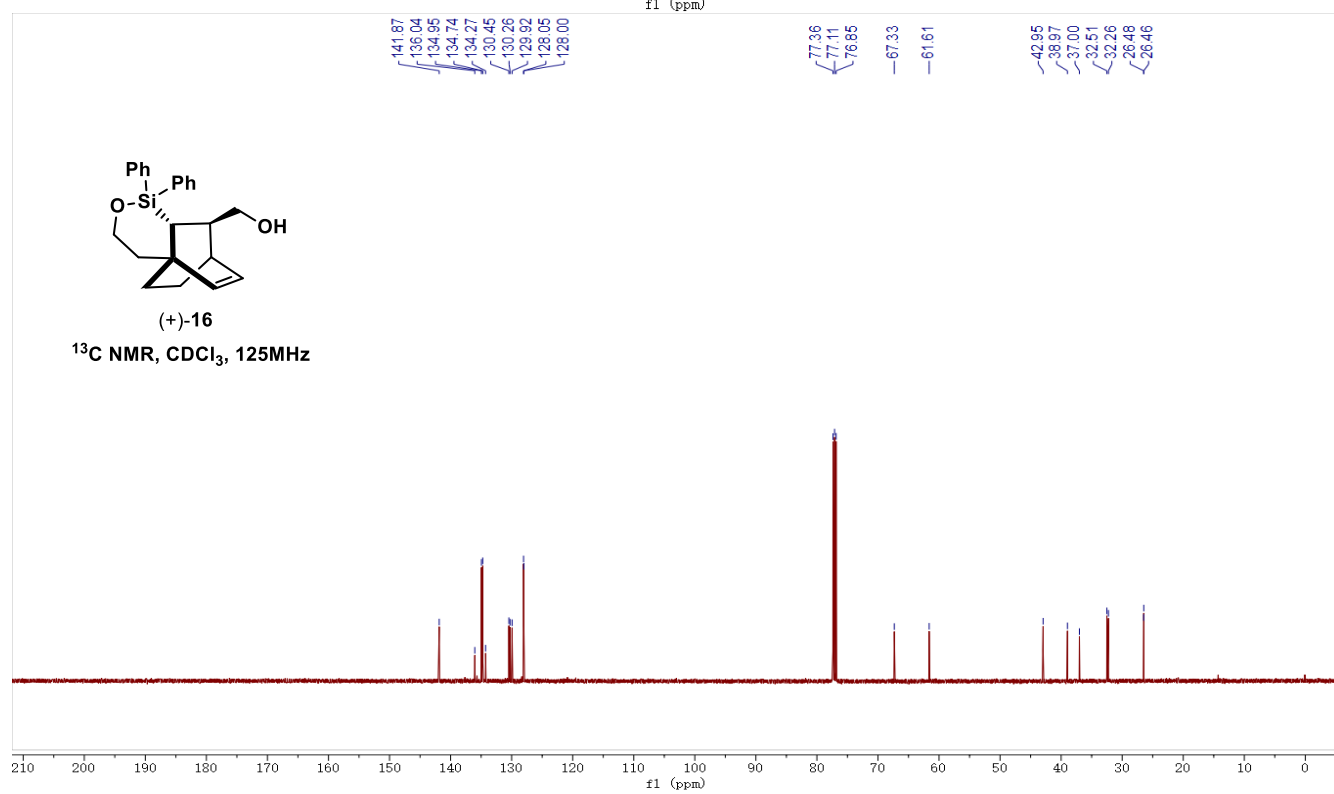

Supplementary Figure 7. NMR spectra of compound (+)-16

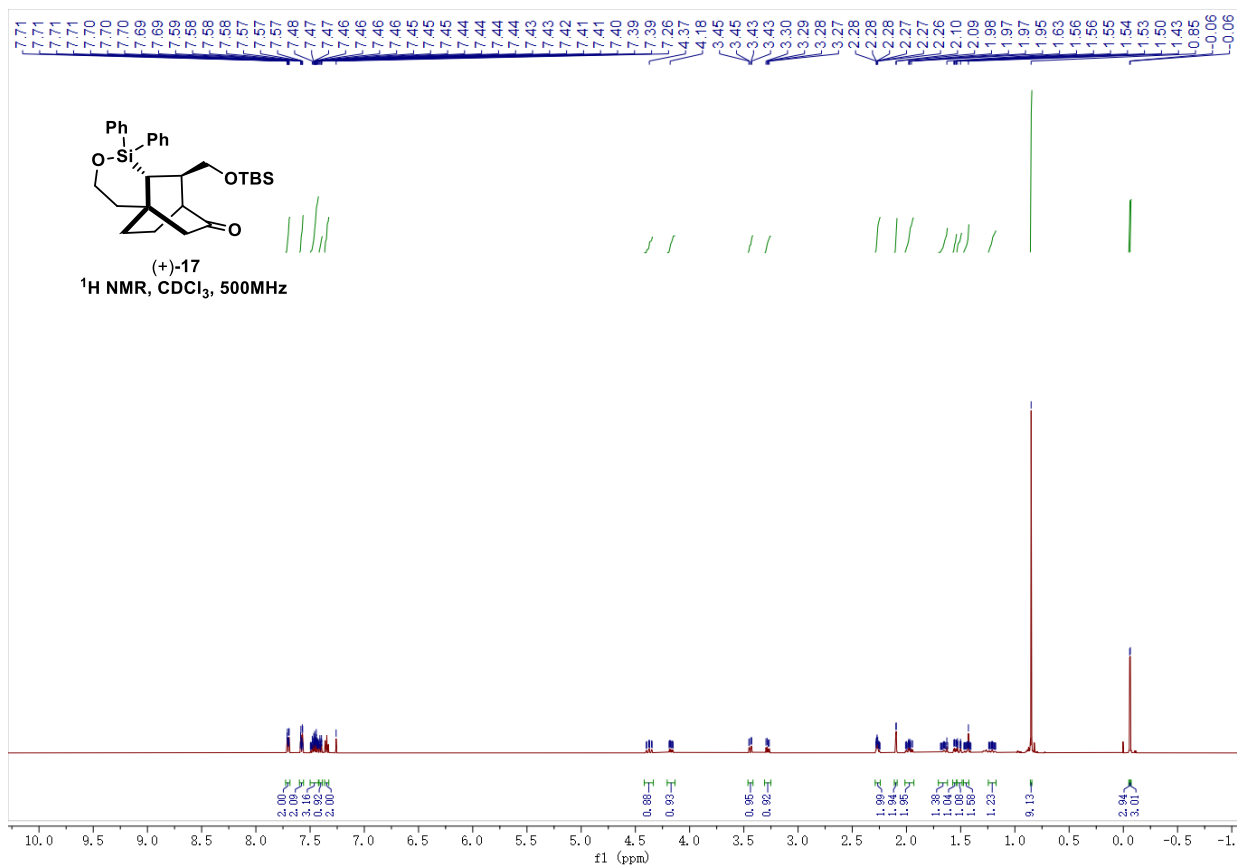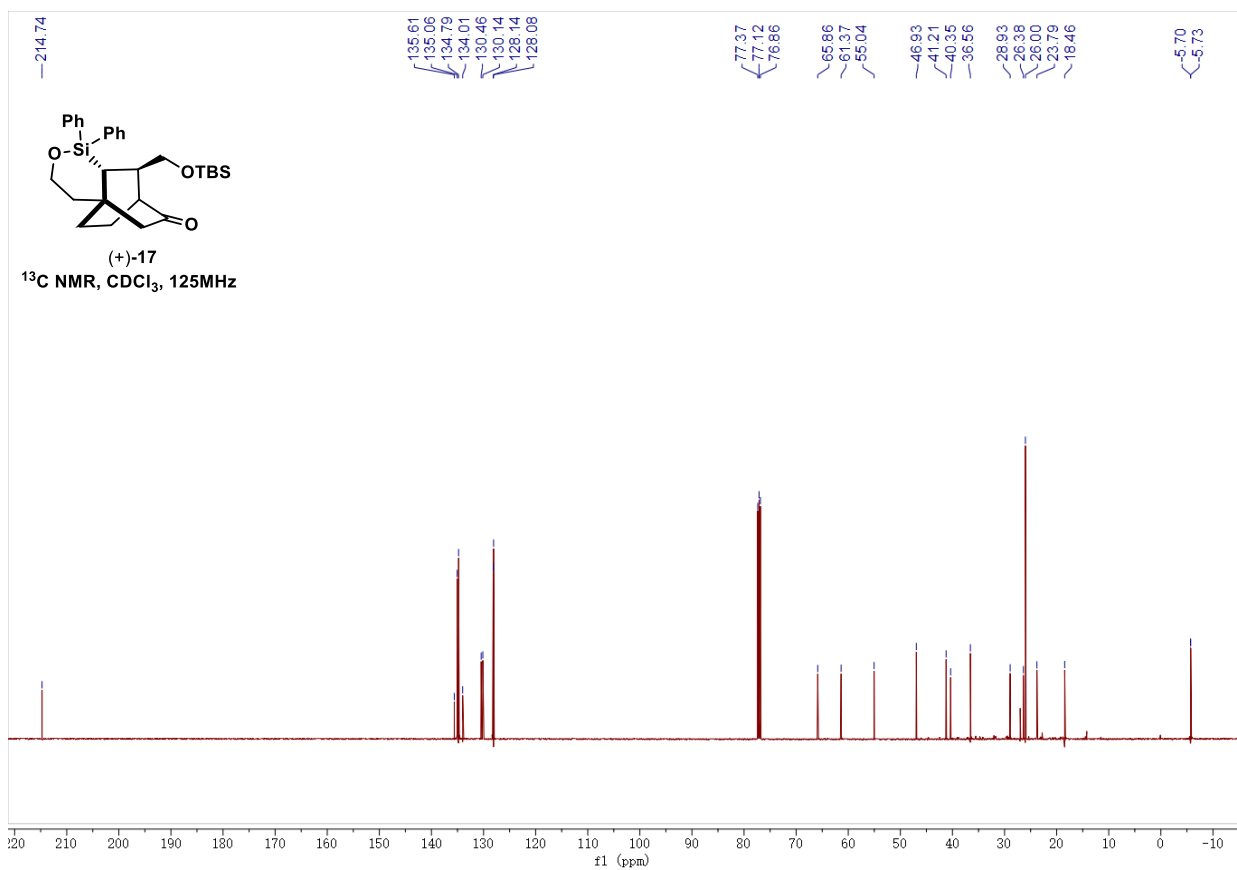

Supplementary Figure 8. NMR spectra of compound (+)-17



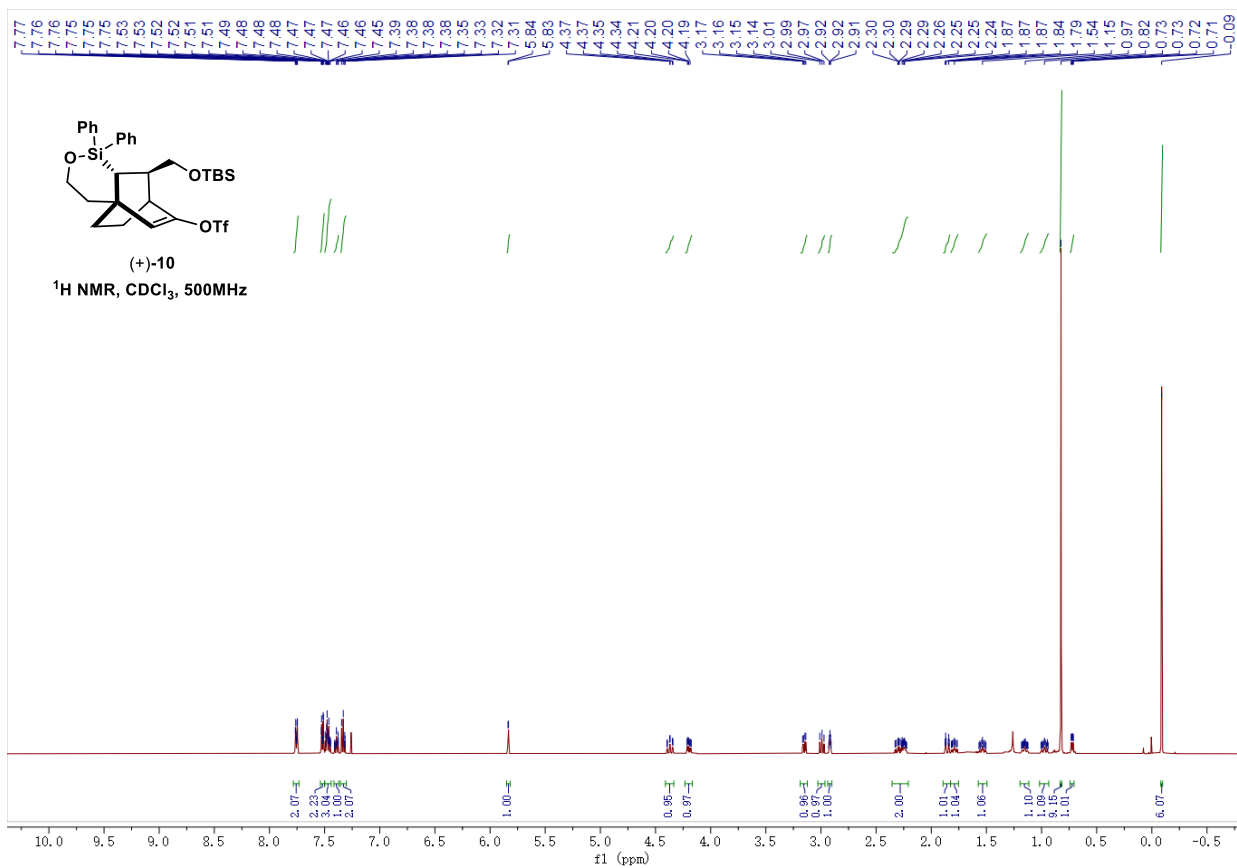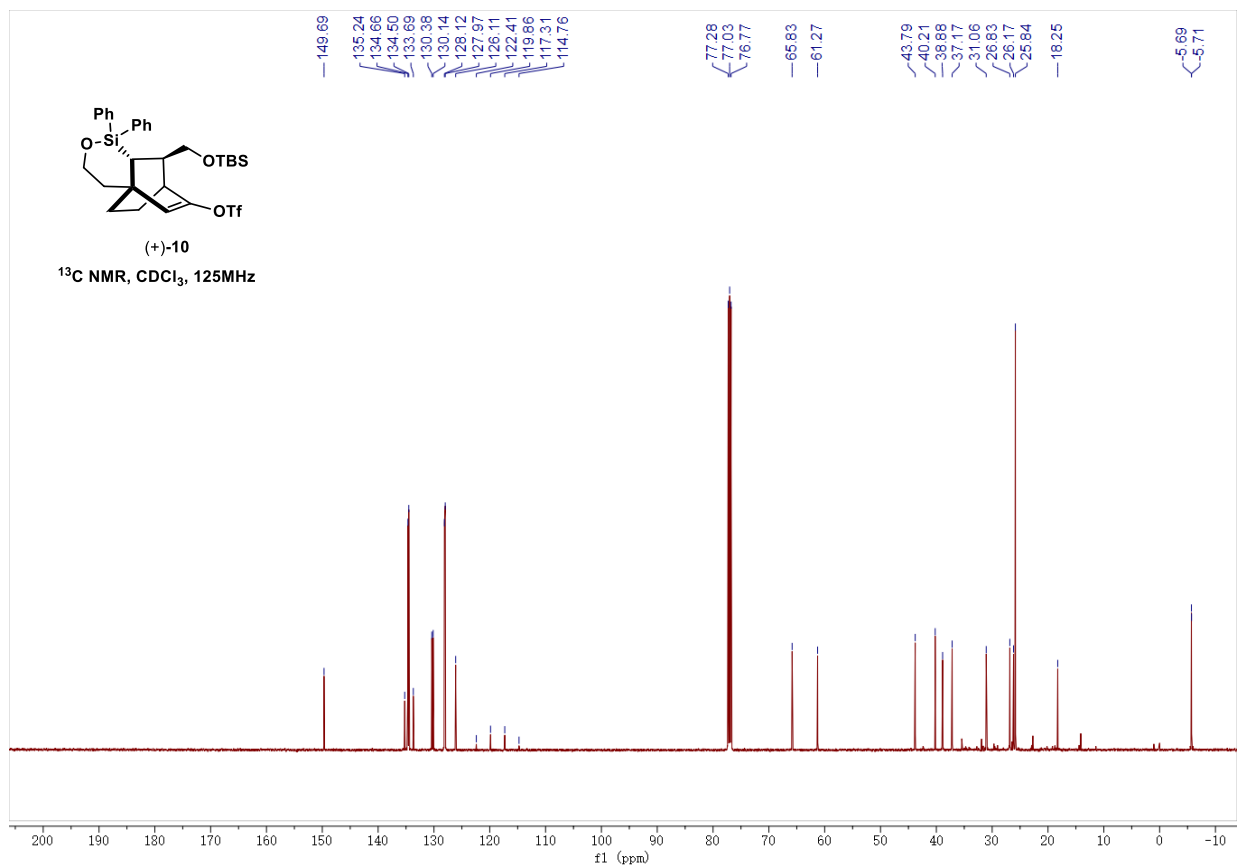

**Supplementary Figure 10. NMR spectra of compound (+)-10**

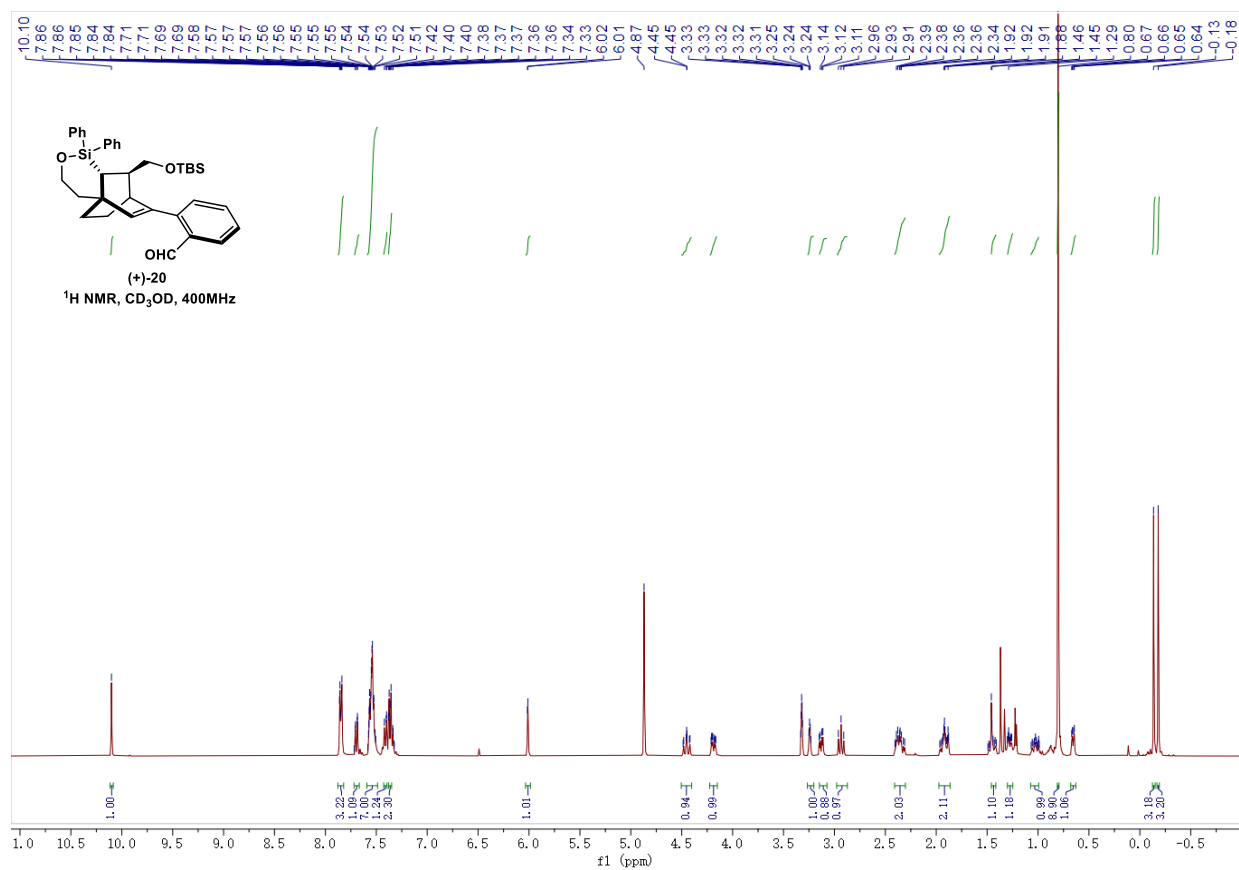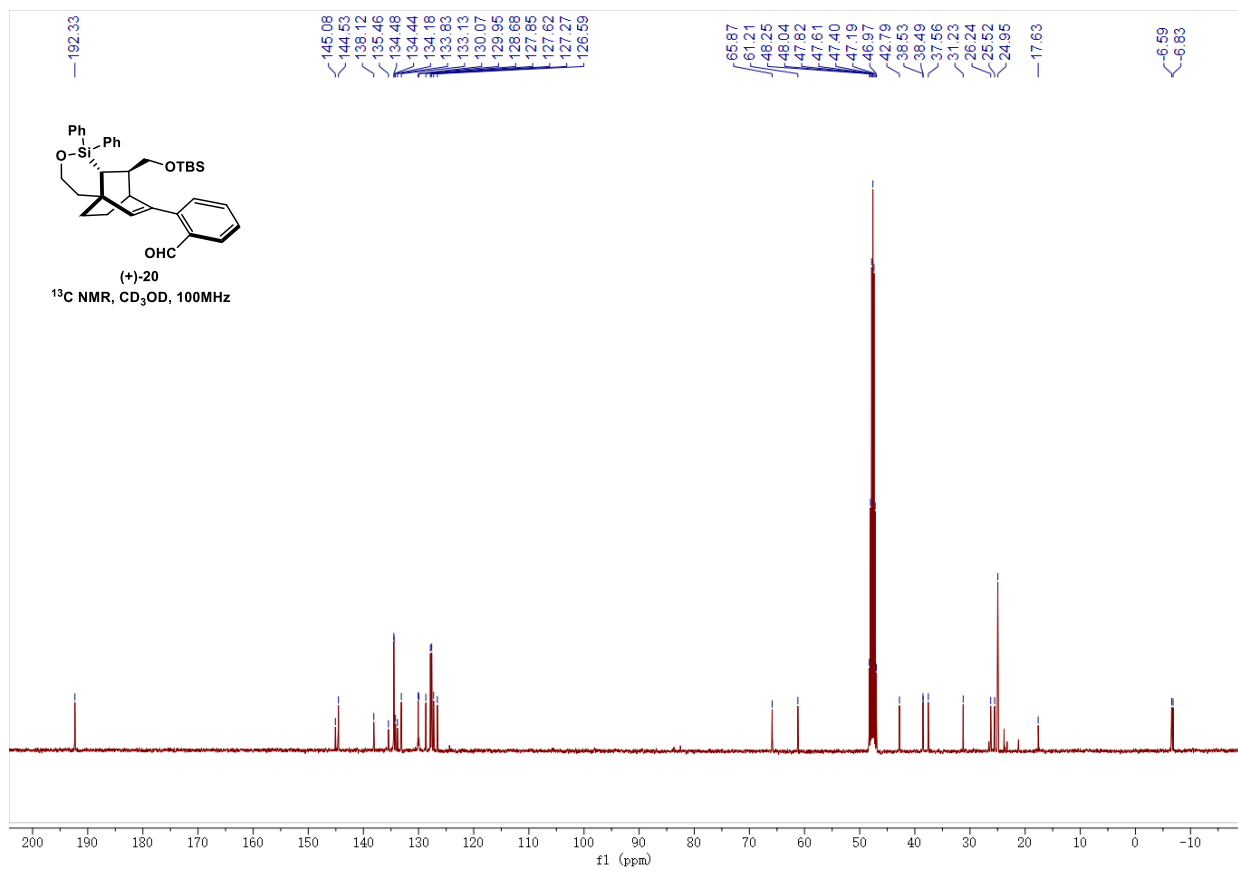

Supplementary Figure 11. NMR spectra of compound (+)-20

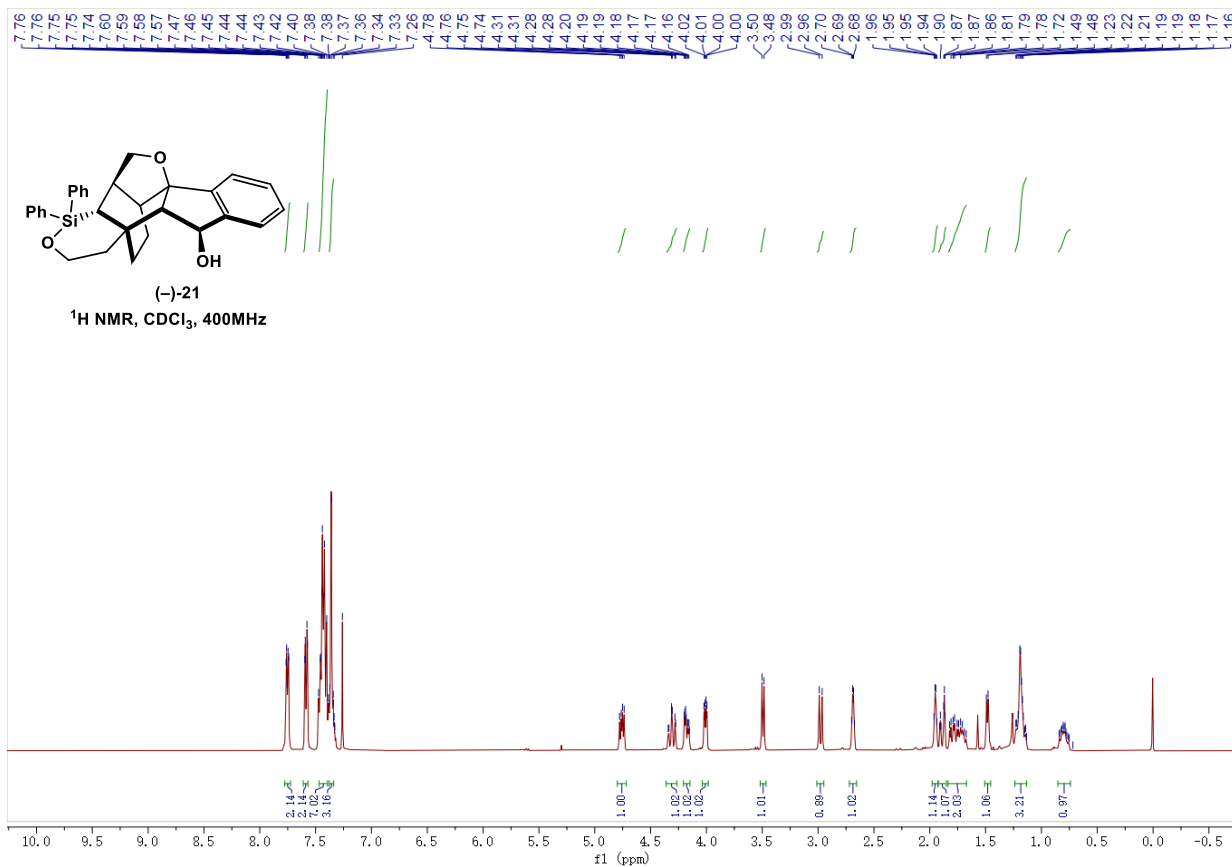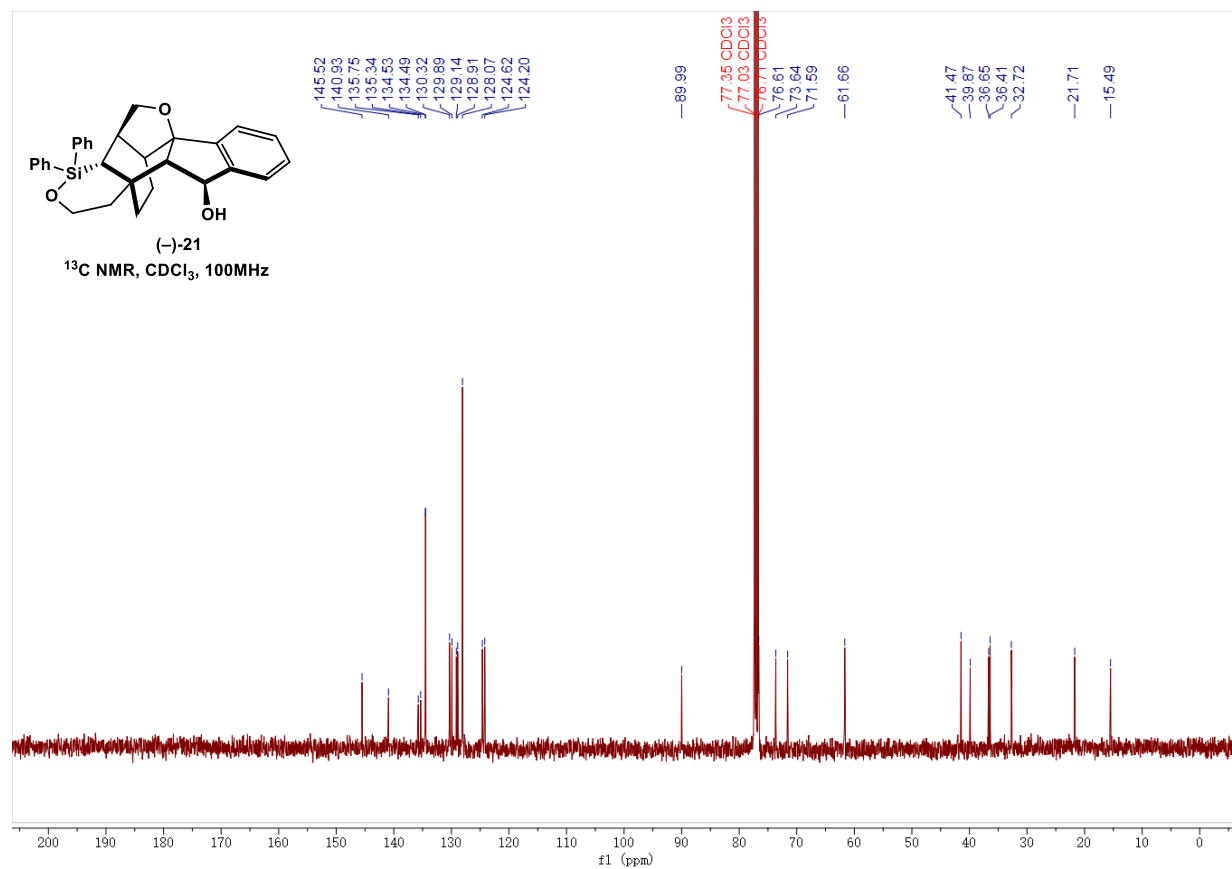

Supplementary Figure 12. NMR spectra of compound (-)-21

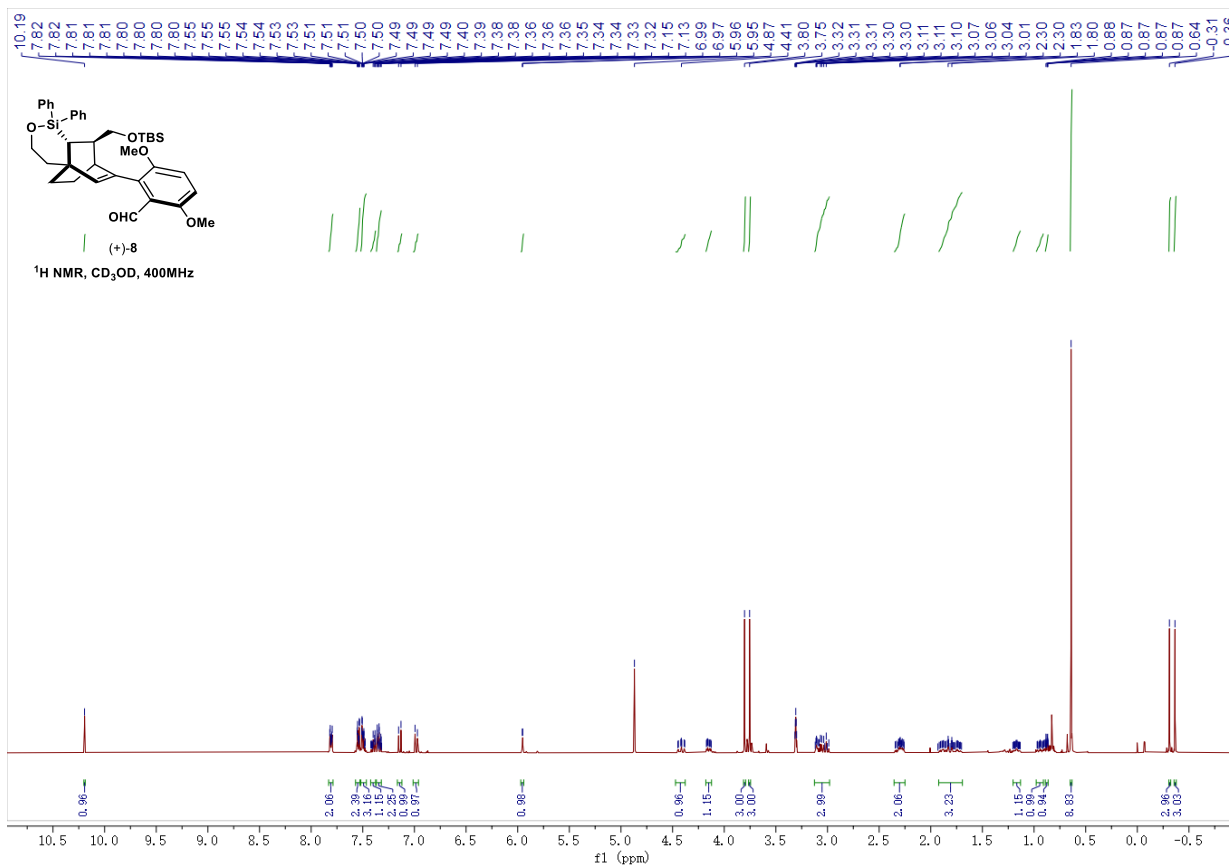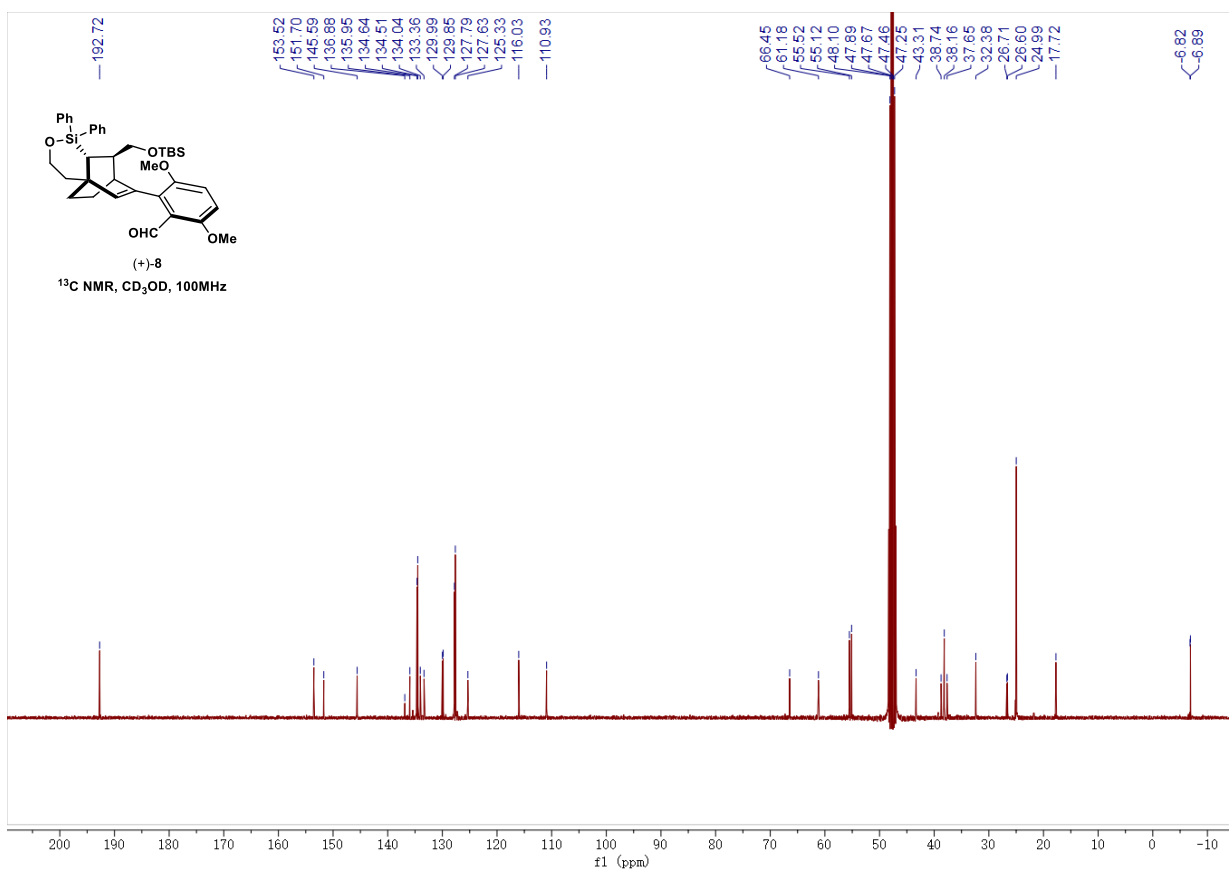

Supplementary Figure 13. NMR spectra of compound (+)-8

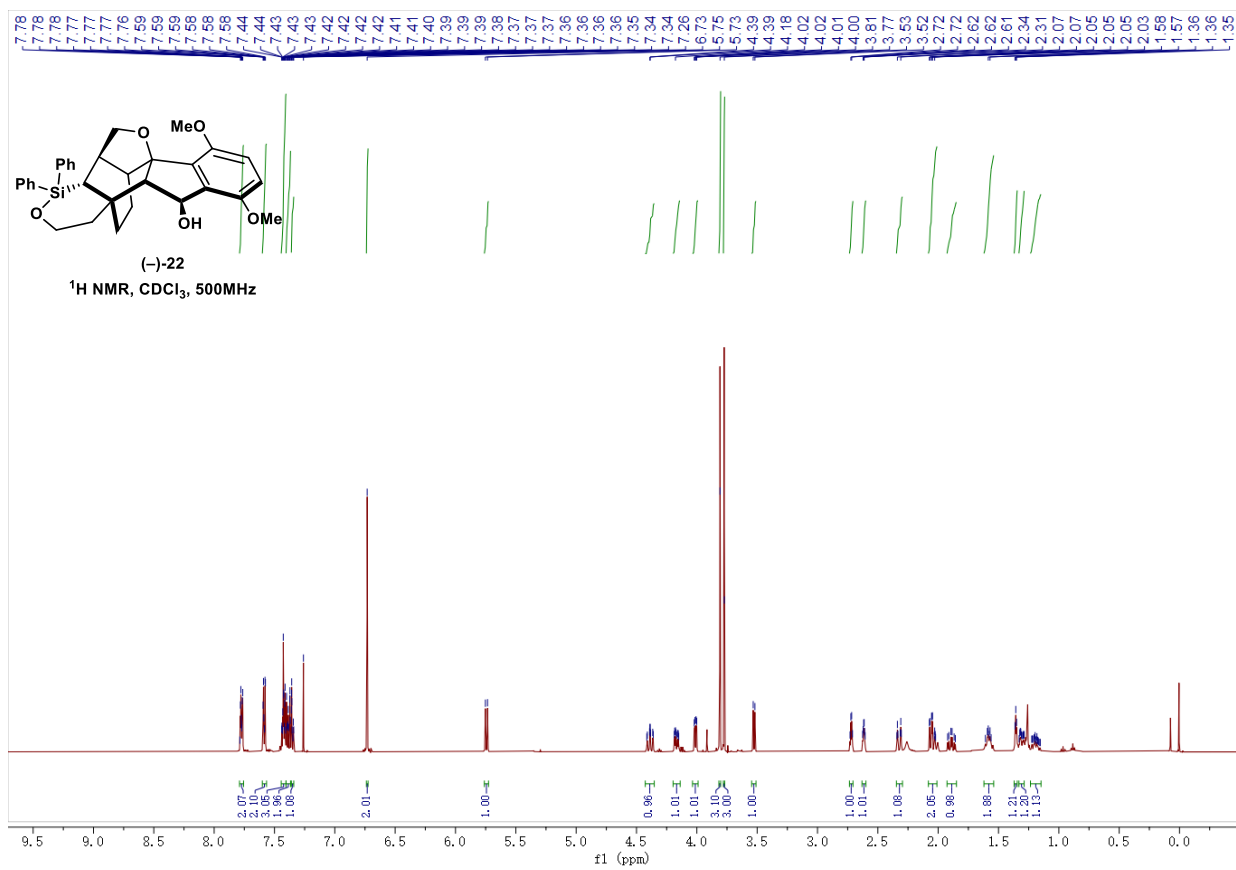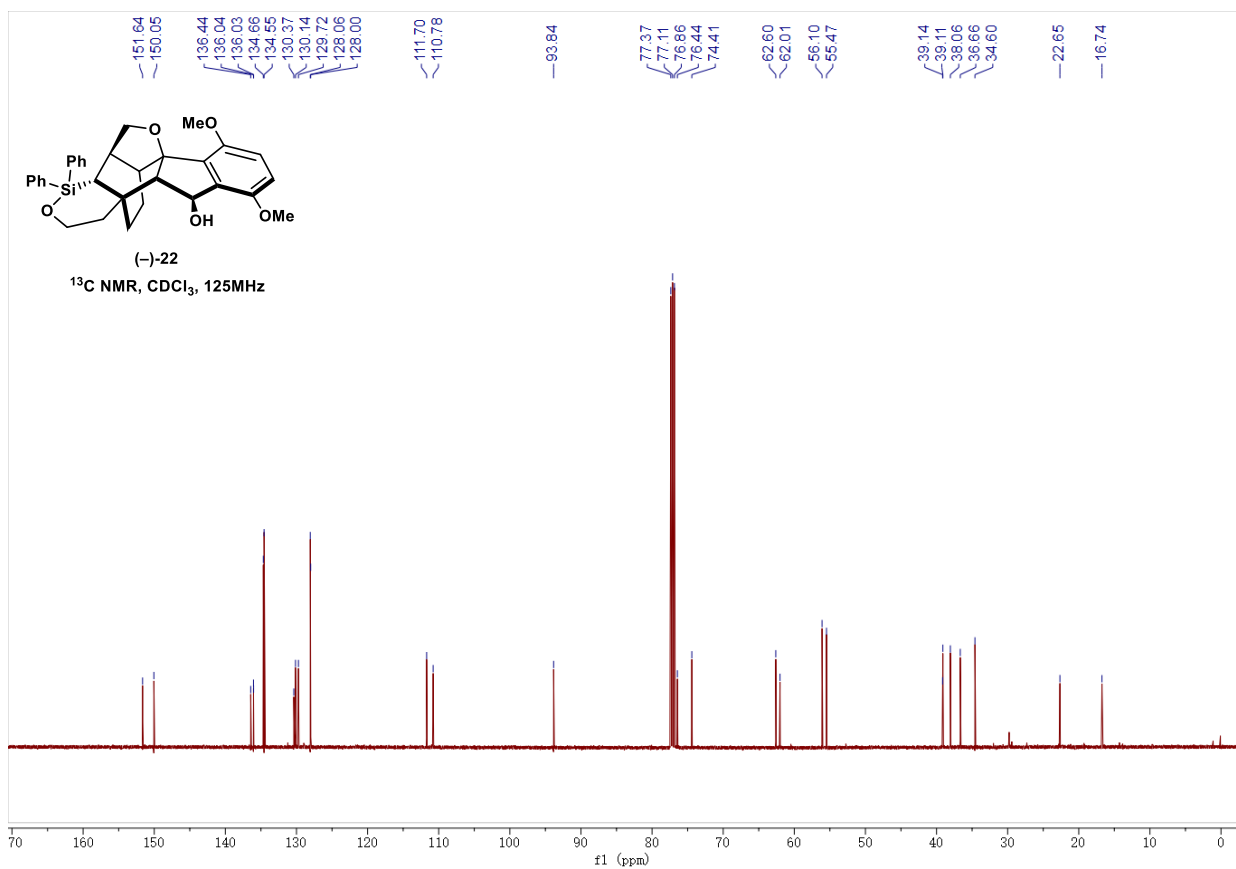

Supplementary Figure 14. NMR spectra of compound (-)-22



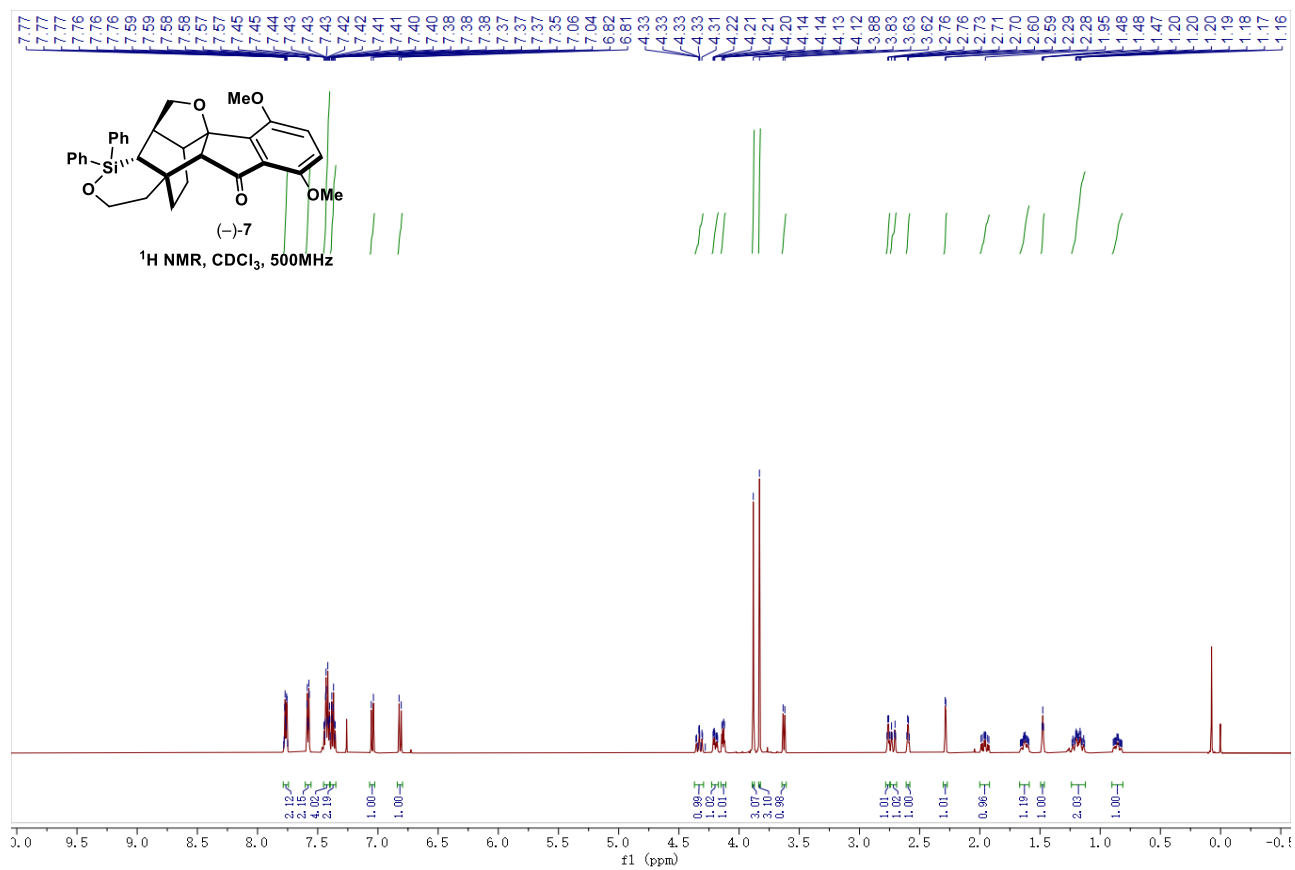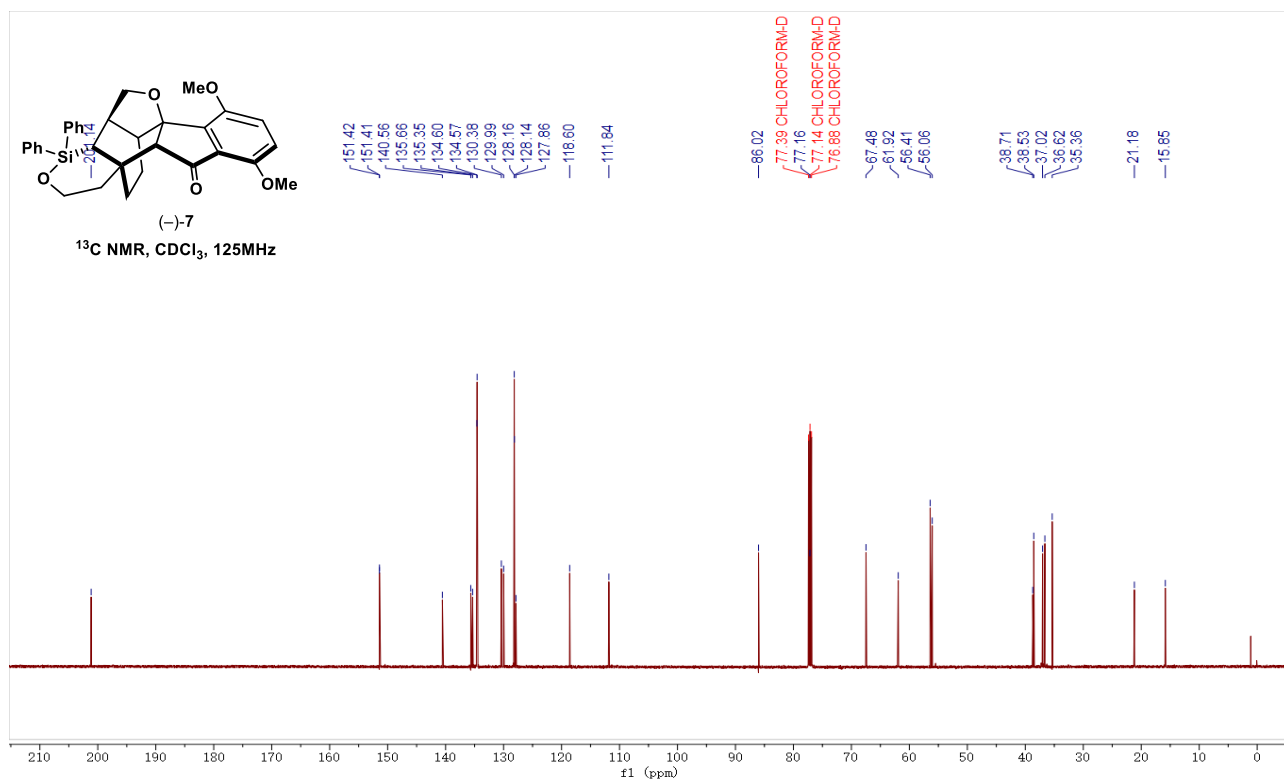

Supplementary Figure 15. NMR spectra of compound (-)-7



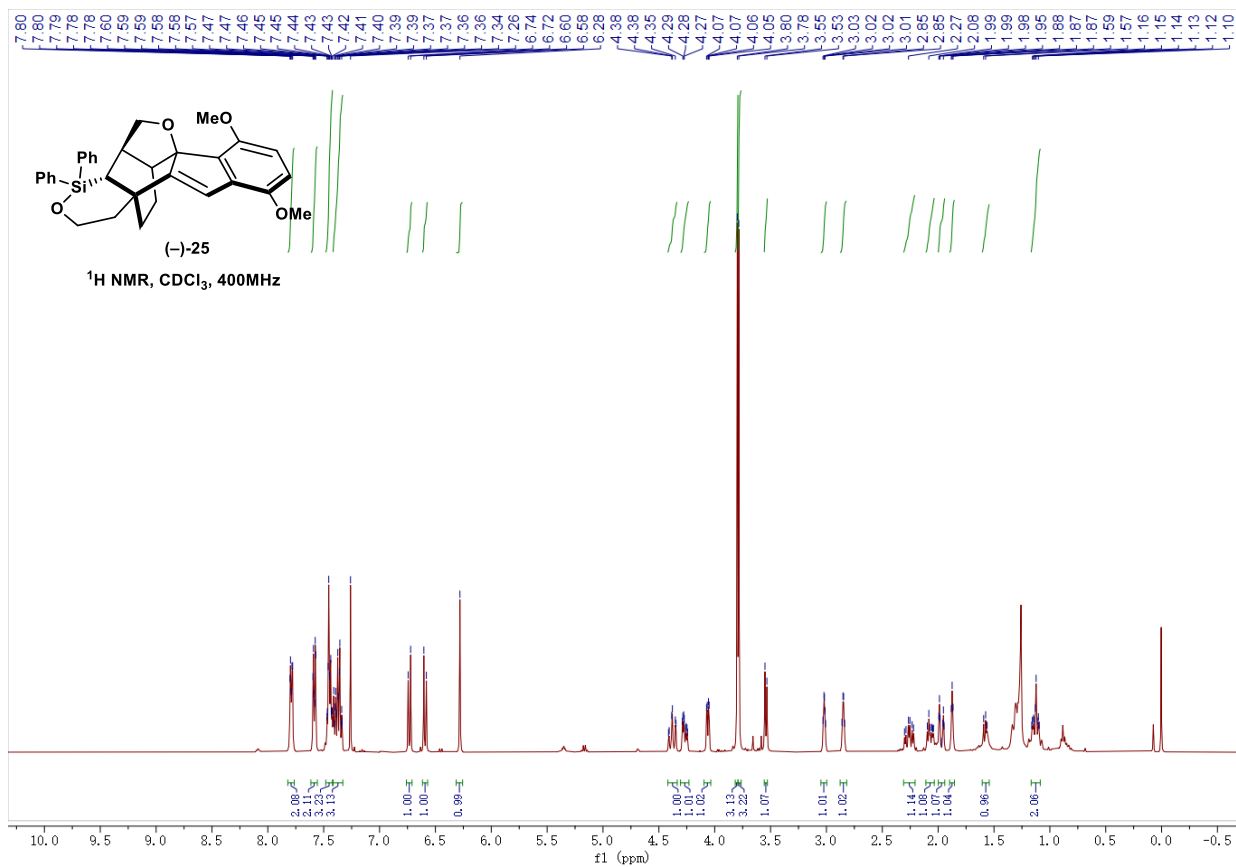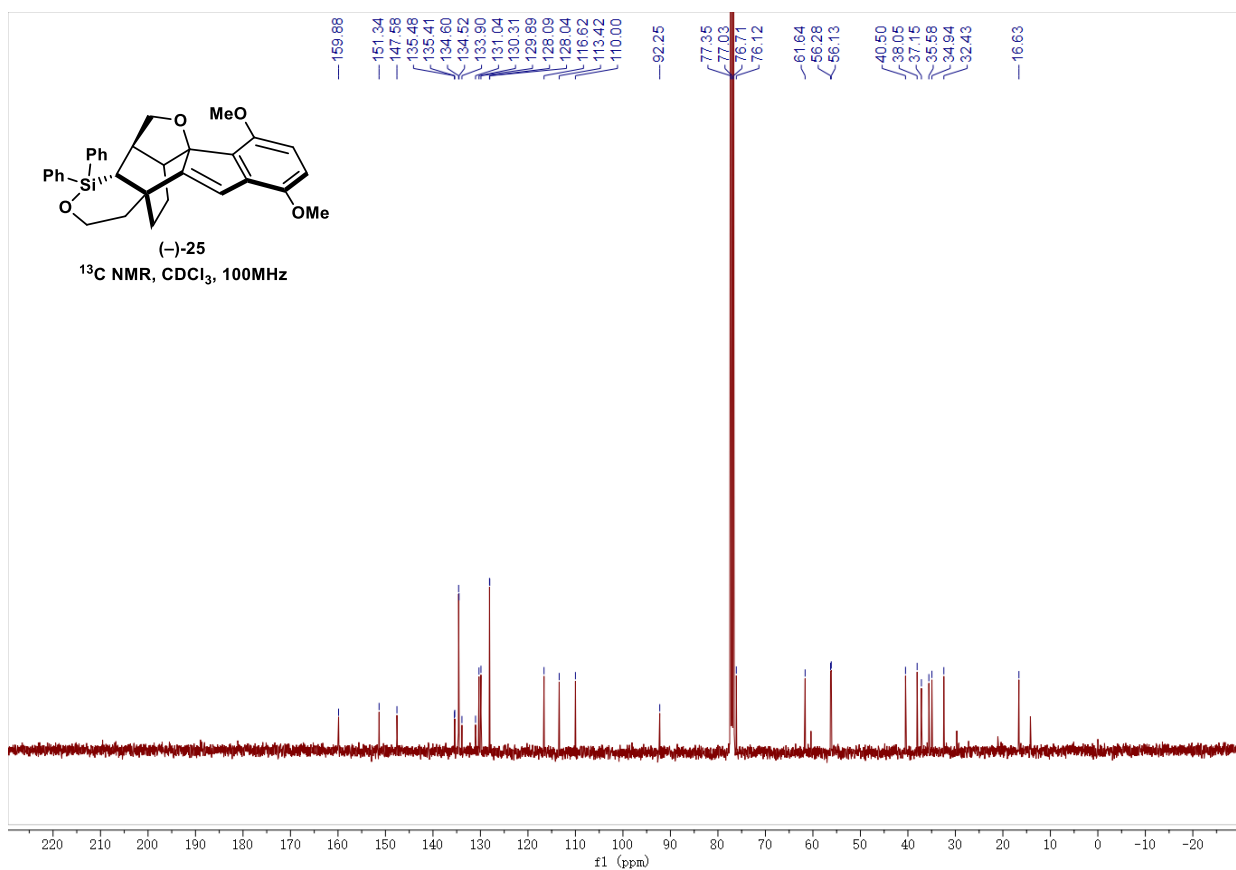

Supplementary Figure 17. NMR spectra of compound (-)-25

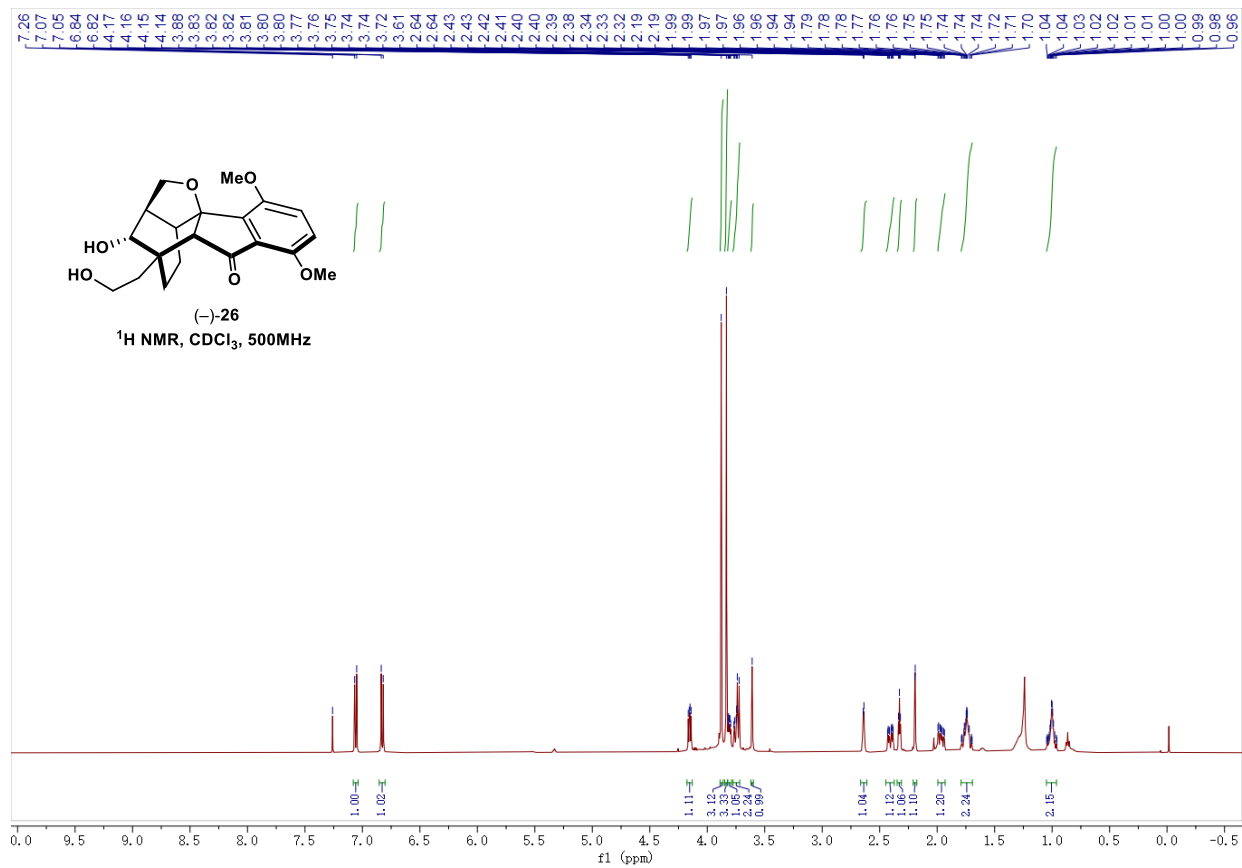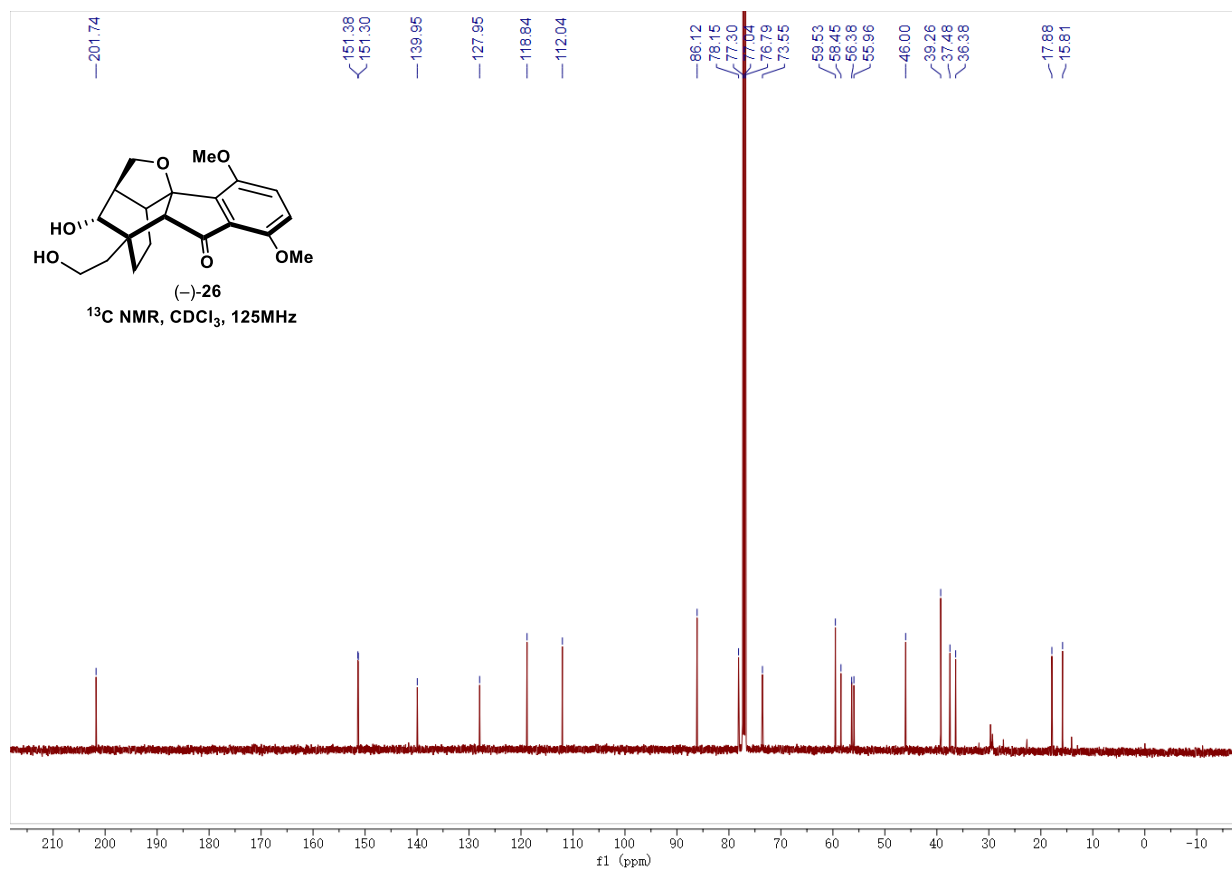

Supplementary Figure 18. NMR spectra of compound (-)-26

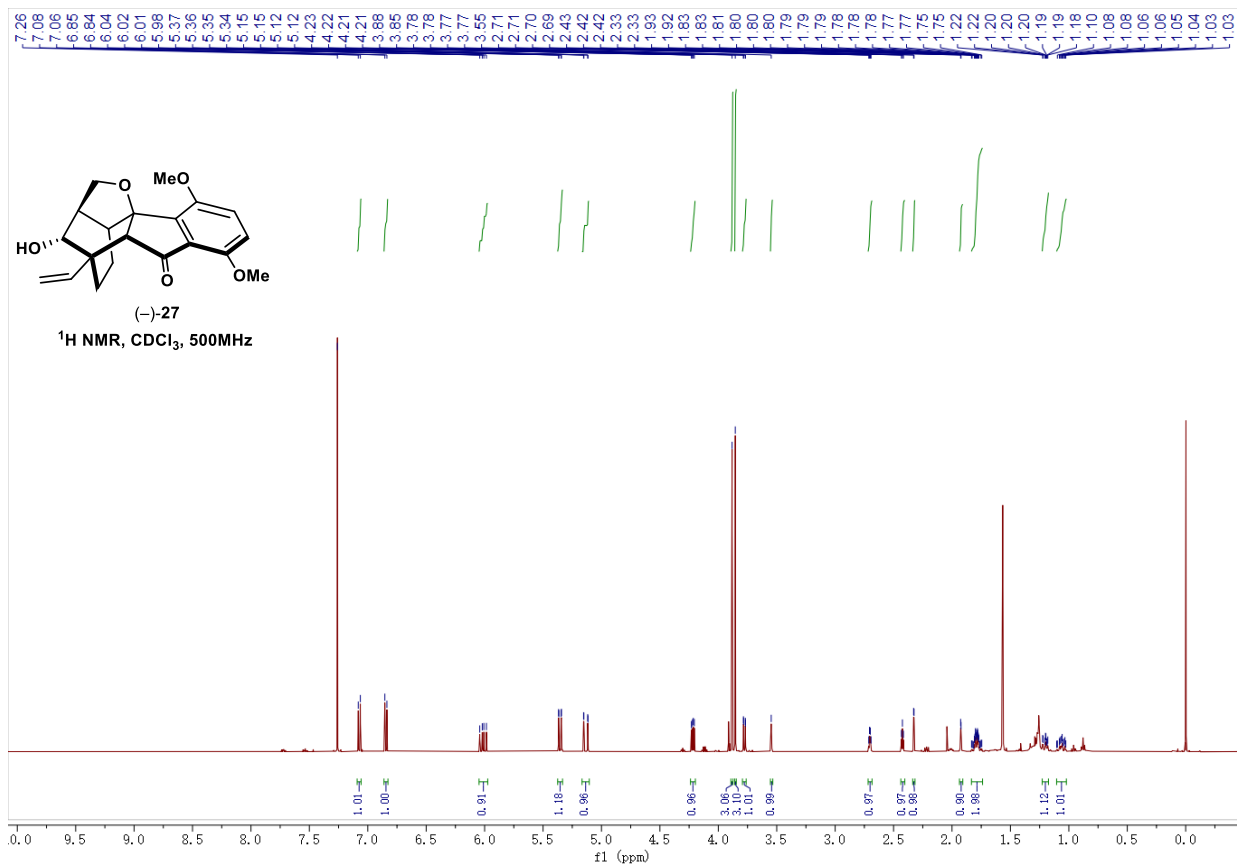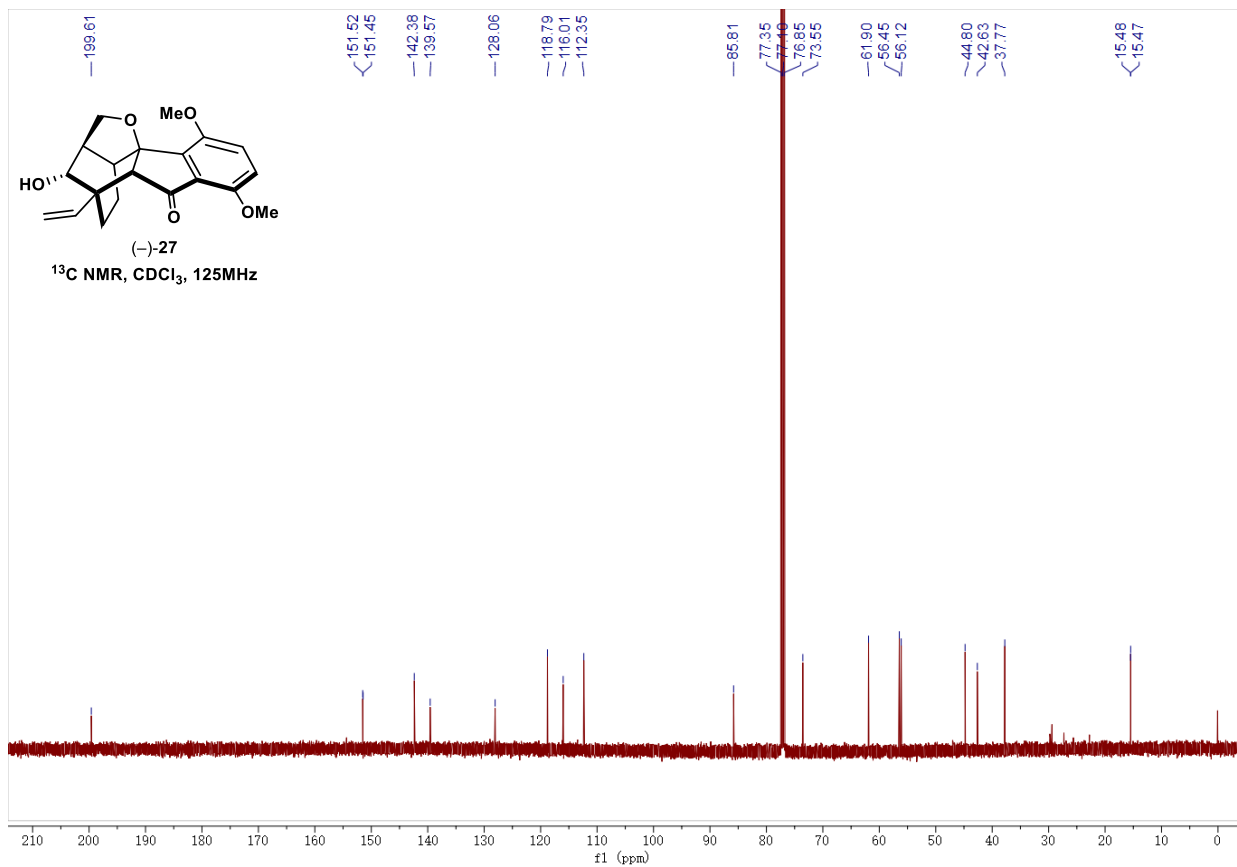

Supplementary Figure 19. NMR spectra of compound (-)-27

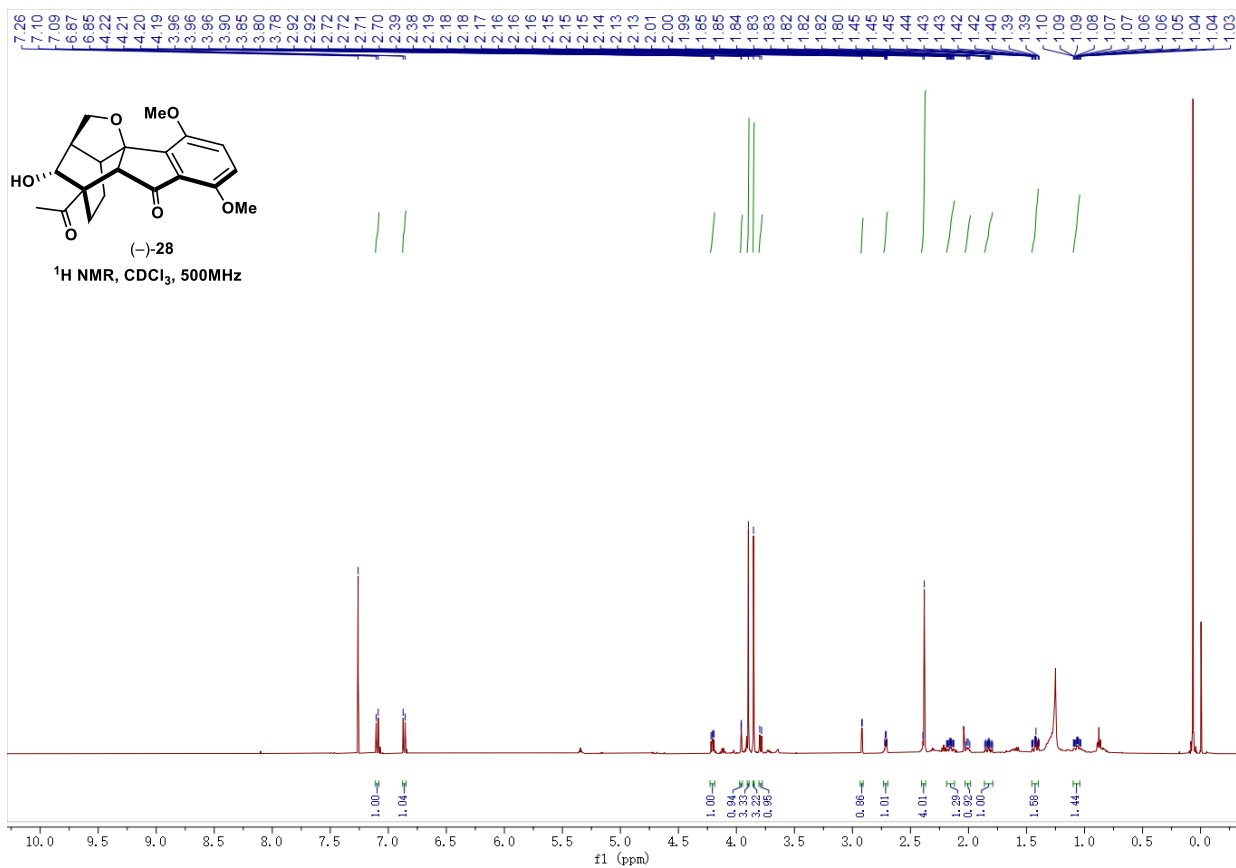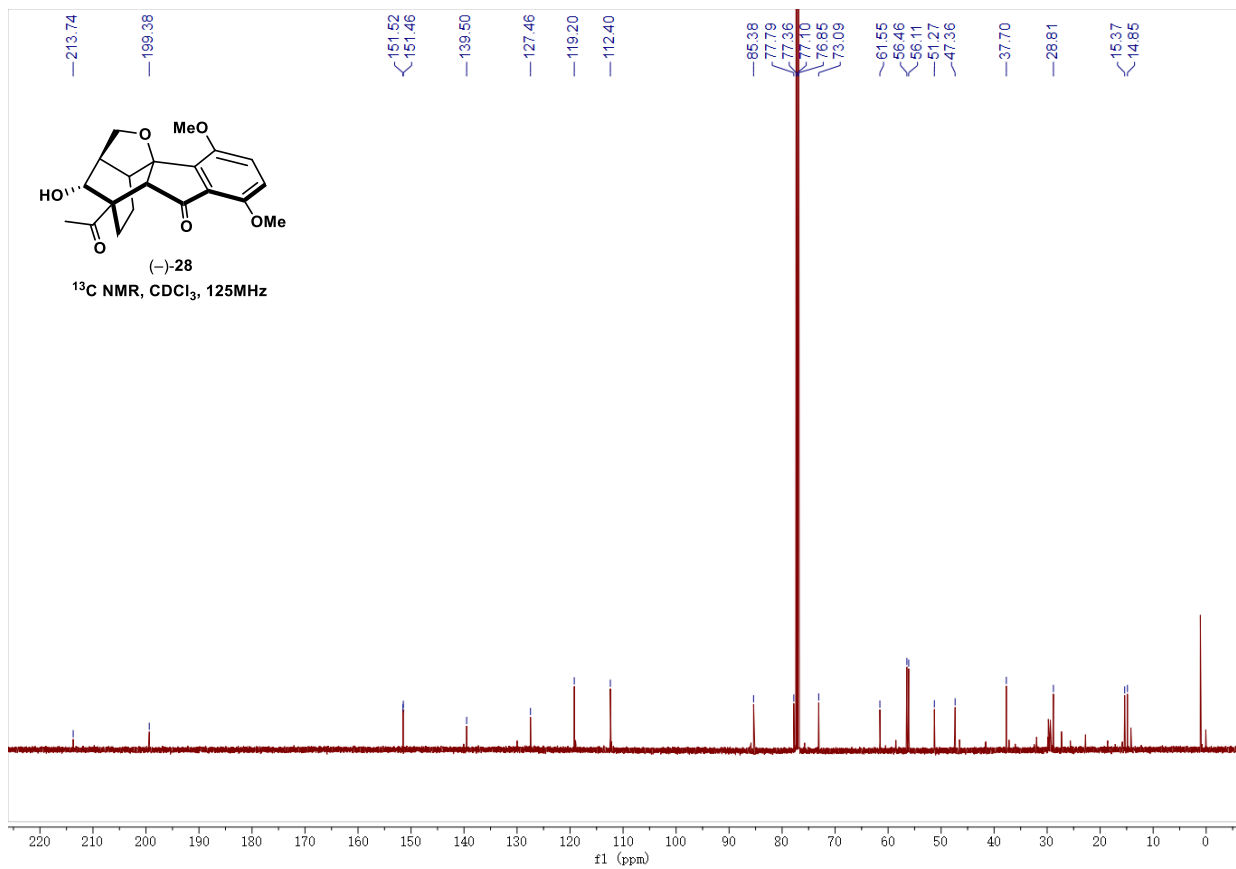

Supplementary Figure 20. NMR spectra of compound (-)-28

## HPLC Data for Compound 11

Chiral HPLC: Chiralpak OD-H, hexane:*i*-PrOH = 80:20, 1.0 mL/min, 210 nm; tR = 11.8 min (minor), 15.9 min (major).

<Chromatogram>

mV

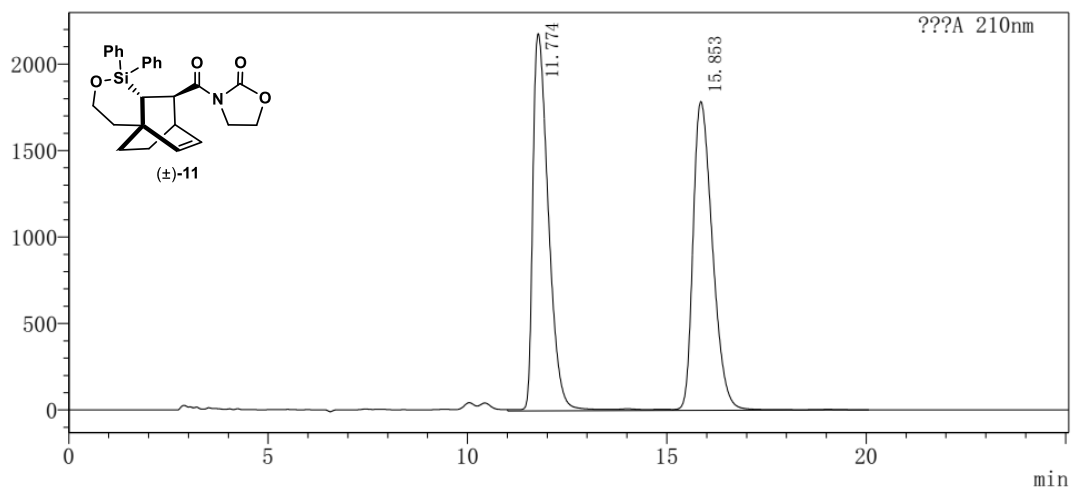

<PEAK>

??A 210nm

| Peak# | Ret. Time | Area      | Height  | Conc.  | unit | Mark | Name |
|-------|-----------|-----------|---------|--------|------|------|------|
| 1     | 11.774    | 59926205  | 2181271 | 49.729 |      | S    |      |
| 2     | 15.853    | 60580038  | 1785287 | 50.271 |      | V    |      |
| Total |           | 120506243 | 3966557 |        |      |      |      |

<Chromatogram>

mV

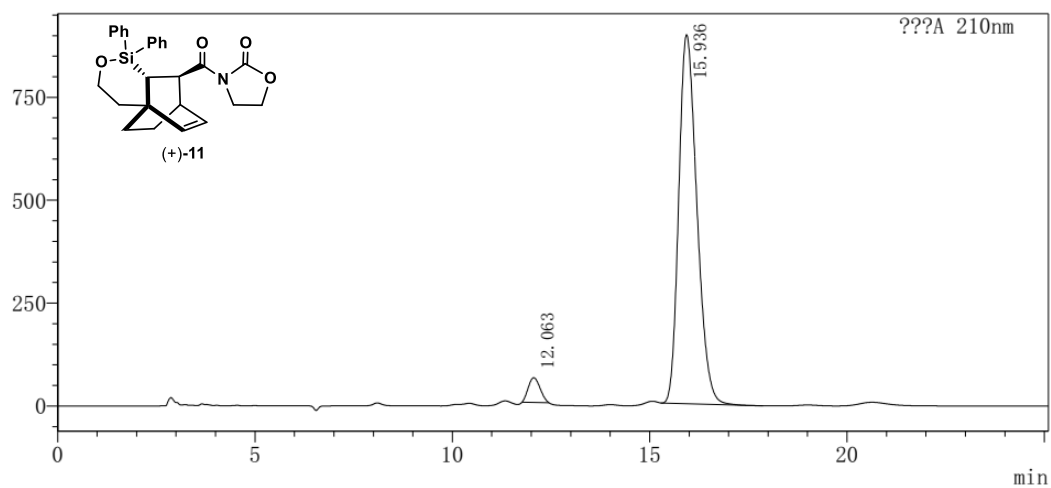

<PEAK>

??A 210nm

| Peak# | Res. Time | Area     | Height | Conc.  | Unit | Mark | Name |
|-------|-----------|----------|--------|--------|------|------|------|
| 1     | 12.063    | 1248994  | 60118  | 4.176  |      | M    |      |
| 2     | 15.936    | 28658805 | 896575 | 95.824 |      | M    |      |
| Total |           | 29907799 | 956694 |        |      |      |      |

Supplementary Figure 21. HPLC spectra of compound 11

### 3.3 Crystallographic information

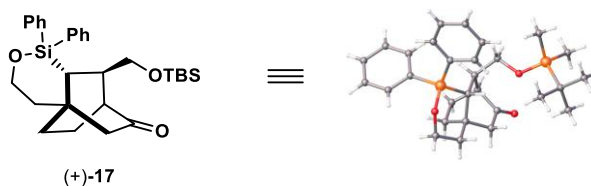

**Supplementary Table 4. Crystal data and structure refinement for compound (+)-17**

X-ray data for compound (+)-17

|                                             |                                                                |
|---------------------------------------------|----------------------------------------------------------------|
| CCDC number                                 | 2271397                                                        |
| Identification code                         | (+) -17                                                        |
| Empirical formula                           | C <sub>29</sub> H <sub>40</sub> O <sub>3</sub> Si <sub>2</sub> |
| Formula weight                              | 492.79                                                         |
| Temperature/K                               | 99.94(18)                                                      |
| Crystal system                              | orthorhombic                                                   |
| Space group                                 | P212121                                                        |
| a/Å                                         | 11.9992(2)                                                     |
| b/Å                                         | 12.1536(2)                                                     |
| c/Å                                         | 37.7267(5)                                                     |
| α/°                                         | 90                                                             |
| β/°                                         | 90                                                             |
| γ/°                                         | 90                                                             |
| Volume/Å <sup>3</sup>                       | 5501.82(16)                                                    |
| Z                                           | 8                                                              |
| ρ <sub>calc</sub> /cm <sup>3</sup>          | 1.190                                                          |
| μ/mm <sup>-1</sup>                          | 1.379                                                          |
| F(000)                                      | 2128.0                                                         |
| Crystal size/mm <sup>3</sup>                | 0.08 × 0.08 × 0.06                                             |
| Radiation                                   | GaKα (λ = 1.54184)                                             |
| 2θ range for data collection/°              | 7.642 to 132.808                                               |
| Index ranges                                | -14 ≤ h ≤ 13, -14 ≤ k ≤ 14, -44 ≤ l ≤ 44                       |
| Reflections collected                       | 105349                                                         |
| Independent reflections                     | 9612 [R <sub>int</sub> = 0.0402, R <sub>sigma</sub> = 0.0188]  |
| Data/restraints/parameters                  | 9612/308/686                                                   |
| Goodness-of-fit on F <sup>2</sup>           | 1.021                                                          |
| Final R indexes [I ≥ 2σ (I)]                | R <sub>1</sub> = 0.0280, wR <sub>2</sub> = 0.0720              |
| Final R indexes [all data]                  | R <sub>1</sub> = 0.0284, wR <sub>2</sub> = 0.0723              |
| Largest diff. peak/hole / e Å <sup>-3</sup> | 0.24/-0.22                                                     |
| Flack parameter                             | 0.000(7)                                                       |



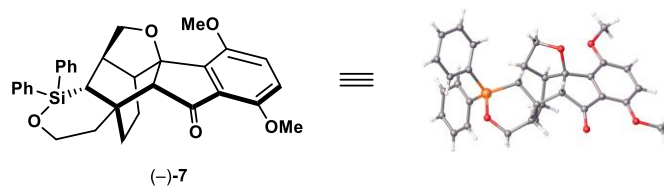

**Supplementary Table 5. Crystal data and structure refinement for compound (-)-7**

X-ray data for compound (-)-7.

|                                             |                                                                        |
|---------------------------------------------|------------------------------------------------------------------------|
| CCDC number                                 | 2277937                                                                |
| Identification code                         | (-)-7                                                                  |
| Empirical formula                           | C <sub>32</sub> H <sub>32</sub> O <sub>5</sub> Si                      |
| Formula weight                              | 542.66                                                                 |
| Temperature/K                               | 300.00(10)                                                             |
| Crystal system                              | tetragonal                                                             |
| Space group                                 | P-41212                                                                |
| a/Å                                         | 11.0291 (2)                                                            |
| b/Å                                         | 11.0291(2)                                                             |
| c/Å                                         | 43.2751(14)                                                            |
| $\alpha$ /°                                 | 90                                                                     |
| $\beta$ /°                                  | 90                                                                     |
| $\gamma$ /°                                 | 90                                                                     |
| Volume/Å <sup>3</sup>                       | 5264.0(3)                                                              |
| Z                                           | 8                                                                      |
| $\rho$ calc/cm <sup>3</sup>                 | 1.324                                                                  |
| $\mu$ /mm <sup>-1</sup>                     | 1.123                                                                  |
| F(000)                                      | 2224.0                                                                 |
| Crystal size/mm <sup>3</sup>                | ? x ? x ?                                                              |
| Radiation                                   | Cu K $\alpha$ ( $\lambda$ = 1.54184)                                   |
| 2 $\theta$ range for data collection/°      | 8.274 to 156.496                                                       |
| Index ranges                                | -11 $\leq$ h $\leq$ 13, -13 $\leq$ k $\leq$ 13, -51 $\leq$ l $\leq$ 54 |
| Reflections collected                       | 37426                                                                  |
| Independent reflections                     | 5523 [Rint = 0.0769, Rsigma = 0.0430]                                  |
| Data/restraints/parameters                  | 5523/0/346                                                             |
| Goodness-of-fit on F <sup>2</sup>           | 1.065                                                                  |
| Final R indexes [ $I \geq 2\sigma(I)$ ]     | R1 = 0.0510, wR2 = 0.1193                                              |
| Final R indexes [all data]                  | R1 = 0.0857, wR2 = 0.1532                                              |
| Largest diff. peak/hole / e Å <sup>-3</sup> | 0.25/-0.20                                                             |
| Flack parameter                             | 0.03(2)                                                                |

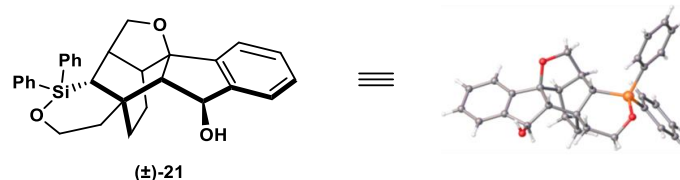

**Supplementary Table 6. Crystal data and structure refinement for compound (±)-21**

X-ray data for compound (±)-21

|                                             |                                                               |
|---------------------------------------------|---------------------------------------------------------------|
| CCDC number                                 | 2312931                                                       |
| Identification code                         | (±)-21                                                        |
| Empirical formula                           | C <sub>30</sub> H <sub>30</sub> O <sub>3</sub> Si             |
| Formula weight                              | 466.63                                                        |
| Temperature/K                               | 100.00(10)                                                    |
| Crystal system                              | triclinic                                                     |
| Space group                                 | P-1                                                           |
| a/Å                                         | 8.85330(10)                                                   |
| b/Å                                         | 10.96160(10)                                                  |
| c/Å                                         | 12.95210(10)                                                  |
| α/°                                         | 104.9690(10)                                                  |
| β/°                                         | 93.0220(10)                                                   |
| γ/°                                         | 93.4100(10)                                                   |
| Volume/Å <sup>3</sup>                       | 1209.13(2)                                                    |
| Z                                           | 2                                                             |
| ρ <sub>calc</sub> /cm <sup>3</sup>          | 1.282                                                         |
| μ/mm <sup>-1</sup>                          | 1.091                                                         |
| F(000)                                      | 496.0                                                         |
| Crystal size/mm <sup>3</sup>                | 0.42 × 0.25 × 0.2                                             |
| Radiation                                   | Cu Kα (λ = 1.54184)                                           |
| 2θ range for data collection/°              | 7.082 to 153.416                                              |
| Index ranges                                | -11 ≤ h ≤ 8, -13 ≤ k ≤ 13, -16 ≤ l ≤ 16                       |
| Reflections collected                       | 20605                                                         |
| Independent reflections                     | 4873 [R <sub>int</sub> = 0.0215, R <sub>sigma</sub> = 0.0128] |
| Data/restraints/parameters                  | 4873/0/308                                                    |
| Goodness-of-fit on F <sup>2</sup>           | 1.056                                                         |
| Final R indexes [I ≥ 2σ (I)]                | R <sub>1</sub> = 0.0362, wR <sub>2</sub> = 0.0938             |
| Final R indexes [all data]                  | R <sub>1</sub> = 0.0368, wR <sub>2</sub> = 0.0943             |
| Largest diff. peak/hole / e Å <sup>-3</sup> | 0.25/-0.43                                                    |

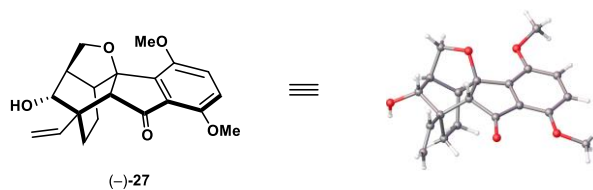

### Supplementary Table 7. Crystal data and structure refinement for compound (-)-27

X-ray data for compound (-)-27

|                                             |                                                |
|---------------------------------------------|------------------------------------------------|
| CCDC number                                 | 2284054                                        |
| Identification code                         | (-)-27                                         |
| Empirical formula                           | C <sub>20</sub> H <sub>22</sub> O <sub>5</sub> |
| Formula weight                              | 342.37                                         |
| Temperature/K                               | 100.01(10)                                     |
| Crystal system                              | orthorhombic                                   |
| Space group                                 | P-212121                                       |
| a/Å                                         | 6.75558(5)                                     |
| b/Å                                         | 12.42947(9)                                    |
| c/Å                                         | 19.93730(14)                                   |
| α/°                                         | 90                                             |
| β/°                                         | 90                                             |
| γ/°                                         | 90                                             |
| Volume/Å <sup>3</sup>                       | 1674.10(2)                                     |
| Z                                           | 4                                              |
| ρ <sub>calc</sub> /cm <sup>3</sup>          | 1.358                                          |
| μ/mm <sup>-1</sup>                          | 0.796                                          |
| F(000)                                      | 728.0                                          |
| Crystal size/mm <sup>3</sup>                | 0.3 × 0.25 × 0.22                              |
| Radiation                                   | Cu Kα (λ = 1.54184)                            |
| 2θ range for data collection/°              | 8.382 to 152.738                               |
| Index ranges                                | -8 ≤ h ≤ 8, -15 ≤ k ≤ 13, -25 ≤ l ≤ 25         |
| Reflections collected                       | 14137                                          |
| Independent reflections                     | 3366 [Rint = 0.0157, Rsigma = 0.0108]          |
| Data/restraints/parameters                  | 3366/0/230                                     |
| Goodness-of-fit on F <sup>2</sup>           | 1.024                                          |
| Final R indexes [I ≥ 2σ (I)]                | R1 = 0.0241, wR2 = 0.0625                      |
| Final R indexes [all data]                  | R1 = 0.0243, wR2 = 0.0626                      |
| Largest diff. peak/hole / e Å <sup>-3</sup> | 0.19/-0.14                                     |
| Flack parameter                             | 0.02(3)                                        |

#### 4. Supplementary References

- [1] Takeshita, T., Seki, Y., Kawamoto, K., Murai, S. & Sonoda, N. The catalyzed reaction of .alpha.,.beta.-unsaturated esters with various hydrosilanes. *J. Org. Chem.* **52**, 4864-4868 (1987)
- [2] Shvartsbart, A. & Smith III, A. B. Total Synthesis of (-)-Calyciphylline N. *J. Am. Chem. Soc.* **136**, 870–873 (2014).
- [3] Sieburth, S. M. & Lang, J. A practical synthesis of difunctional organosilane reagents and their application to the Diels–Alder reaction. *J. Org. Chem.* **64**, 1780–1781 (1999).
